# Supplementary material for: 3-O-Carbamoyl-5,7,20-O-trimethylsilybins: Synthesis and Preliminary Antiproliferative Evaluation
Source: MDPI journal article supplement (doi:10.3390/molecules26216421), 2021-10-24
Supplement: s1 [file s1]

## Electronic Supplementary Information

### **3-*O*-Carbamoyl-5,7,20-*O*-trimethylsilybins: Synthesis and preliminary antiproliferative evaluation**

Sitong Wu<sup>a</sup>, Guanglin Chen<sup>a</sup>, Qiang Zhang<sup>b,c</sup>, Guangdi Wang<sup>b,c</sup>, and Qiao-Hong Chen<sup>\*a</sup>

<sup>a</sup>Department of Chemistry and Biochemistry, California State University, Fresno, 2555 E. San Ramon Avenue, M/S SB70, Fresno, CA 93740, USA

<sup>b</sup>Department of Chemistry and <sup>c</sup>RCMI Cancer Research Center, Xavier University of Louisiana, 1 Drexel Drive, New Orleans, LA 70125, USA

#### **List of Contents:**

|                                                                                        |     |
|----------------------------------------------------------------------------------------|-----|
| <b>Figure S1:</b> <sup>1</sup> H NMR spectrum of <b>5</b> in CDCl <sub>3</sub> .....   | S3  |
| <b>Figure S2:</b> <sup>13</sup> C NMR spectrum of <b>5</b> in CDCl <sub>3</sub> .....  | S4  |
| <b>Figure S3:</b> COSY spectrum of <b>5</b> in CDCl <sub>3</sub> .....                 | S5  |
| <b>Figure S4:</b> HSQC spectrum of <b>5</b> in CDCl <sub>3</sub> .....                 | S6  |
| <b>Figure S5:</b> HMBC spectrum of <b>5</b> in CDCl <sub>3</sub> .....                 | S7  |
| <b>Figure S6:</b> High resolution mass spectrum of <b>5</b> .....                      | S8  |
| <b>Figure S7:</b> HPLC chromatogram of <b>5</b> .....                                  | S9  |
| <b>Figure S8:</b> <sup>1</sup> H NMR spectrum of <b>4</b> in CDCl <sub>3</sub> .....   | S10 |
| <b>Figure S9:</b> <sup>13</sup> C NMR spectrum of <b>4</b> in CDCl <sub>3</sub> .....  | S11 |
| <b>Figure S10:</b> High resolution mass spectrum of <b>4</b> .....                     | S12 |
| <b>Figure S11:</b> HPLC chromatogram of <b>4</b> .....                                 | S13 |
| <b>Figure S12:</b> <sup>1</sup> H NMR spectrum of <b>6</b> in CDCl <sub>3</sub> .....  | S14 |
| <b>Figure S13:</b> <sup>13</sup> C NMR spectrum of <b>6</b> in CDCl <sub>3</sub> ..... | S15 |
| <b>Figure S14:</b> High resolution mass spectrum of <b>6</b> .....                     | S16 |
| <b>Figure S15:</b> HPLC chromatogram of <b>6</b> .....                                 | S17 |
| <b>Figure S16:</b> <sup>1</sup> H NMR spectrum of <b>7</b> in CDCl <sub>3</sub> .....  | S18 |
| <b>Figure S17:</b> <sup>13</sup> C NMR spectrum of <b>7</b> in CDCl <sub>3</sub> ..... | S19 |
| <b>Figure S18:</b> High resolution mass spectrum of <b>7</b> .....                     | S20 |
| <b>Figure S19:</b> HPLC chromatogram of <b>7</b> .....                                 | S21 |
| <b>Figure S20:</b> <sup>1</sup> H NMR spectrum of <b>8</b> in CDCl <sub>3</sub> .....  | S22 |
| <b>Figure S21:</b> <sup>13</sup> C NMR spectrum of <b>8</b> in CDCl <sub>3</sub> ..... | S23 |

|                                                                                       |          |
|---------------------------------------------------------------------------------------|----------|
| <b>Figure S22:</b> High resolution mass spectrum of <b>8</b> .....                    | S24      |
| <b>Figure S23:</b> HPLC chromatogram of <b>8</b> .....                                | S25      |
| <b>Figure S24:</b> $^1\text{H}$ NMR spectrum of <b>9</b> in $\text{CDCl}_3$ .....     | S26      |
| <b>Figure S25:</b> $^{13}\text{C}$ NMR spectrum of <b>9</b> in $\text{CDCl}_3$ .....  | S27      |
| <b>Figure S26:</b> High resolution mass spectrum of <b>9</b> .....                    | S28      |
| <b>Figure S27:</b> HPLC chromatogram of <b>9</b> .....                                | S29      |
| <b>Figure S28:</b> $^1\text{H}$ NMR spectrum of <b>10</b> in $\text{CDCl}_3$ .....    | S30      |
| <b>Figure S29:</b> $^{13}\text{C}$ NMR spectrum of <b>10</b> in $\text{CDCl}_3$ ..... | S31      |
| <b>Figure S30:</b> High resolution mass spectrum of <b>10</b> .....                   | S32      |
| <b>Figure S31:</b> $^1\text{H}$ NMR spectrum of <b>11</b> in $\text{CDCl}_3$ .....    | S33      |
| <b>Figure S32:</b> $^{13}\text{C}$ NMR spectrum of <b>11</b> in $\text{CDCl}_3$ ..... | S34      |
| <b>Figure S33:</b> High resolution mass spectrum of <b>11</b> .....                   | S35      |
| <b>Figure S33:</b> HPLC chromatogram of <b>11</b> .....                               | S36      |
| <b>Figure S34:</b> $^1\text{H}$ NMR spectrum of <b>12</b> in $\text{CDCl}_3$ .....    | S37      |
| <b>Figure S35:</b> $^{13}\text{C}$ NMR spectrum of <b>12</b> in $\text{CDCl}_3$ ..... | S38      |
| <b>Figure S36:</b> High resolution mass spectrum of <b>12</b> .....                   | S39      |
| <b>Figure S37:</b> HPLC chromatogram of <b>12</b> .....                               | S40      |
| <b>Figure S38:</b> $^1\text{H}$ NMR spectrum of <b>13</b> in $\text{CDCl}_3$ .....    | S41      |
| <b>Figure S39:</b> $^{13}\text{C}$ NMR spectrum of <b>13</b> in $\text{CDCl}_3$ ..... | S42      |
| <b>Figure S40:</b> High resolution mass spectrum of <b>13</b> .....                   | S43      |
| <b>Figure S41:</b> HPLC chromatogram of <b>13</b> .....                               | S44      |
| <b>Figure S42:</b> $^1\text{H}$ NMR spectrum of <b>14</b> in $\text{CDCl}_3$ .....    | S45      |
| <b>Figure S43:</b> $^{13}\text{C}$ NMR spectrum of <b>14</b> in $\text{CDCl}_3$ ..... | S46      |
| <b>Figure S44:</b> High resolution mass spectrum of <b>14</b> .....                   | S47      |
| <b>Figure S45:</b> $^1\text{H}$ NMR spectrum of <b>15</b> in $\text{CDCl}_3$ .....    | S48      |
| <b>Figure S46:</b> $^{13}\text{C}$ NMR spectrum of <b>15</b> in $\text{CDCl}_3$ ..... | S49      |
| <b>Figure S47:</b> High resolution mass spectrum of <b>15</b> .....                   | S50      |
| <b>Figure S48:</b> $^1\text{H}$ NMR spectrum of <b>16</b> in $\text{CDCl}_3$ .....    | S51      |
| <b>Figure S49:</b> $^{13}\text{C}$ NMR spectrum of <b>16</b> in $\text{CDCl}_3$ ..... | S52      |
| <b>Figure S50:</b> High resolution mass spectrum of <b>16</b> .....                   | S53      |
| <b>Figure S51:</b> $^1\text{H}$ NMR spectrum of <b>17</b> in $\text{CDCl}_3$ .....    | S54      |
| <b>Figure S52:</b> $^{13}\text{C}$ NMR spectrum of <b>17</b> in $\text{CDCl}_3$ ..... | S55      |
| <b>Figure S53:</b> High resolution mass spectrum of <b>17</b> .....                   | S56      |
| <b>Figure S54:</b> The concentration-effect curves .....                              | S57-S101 |



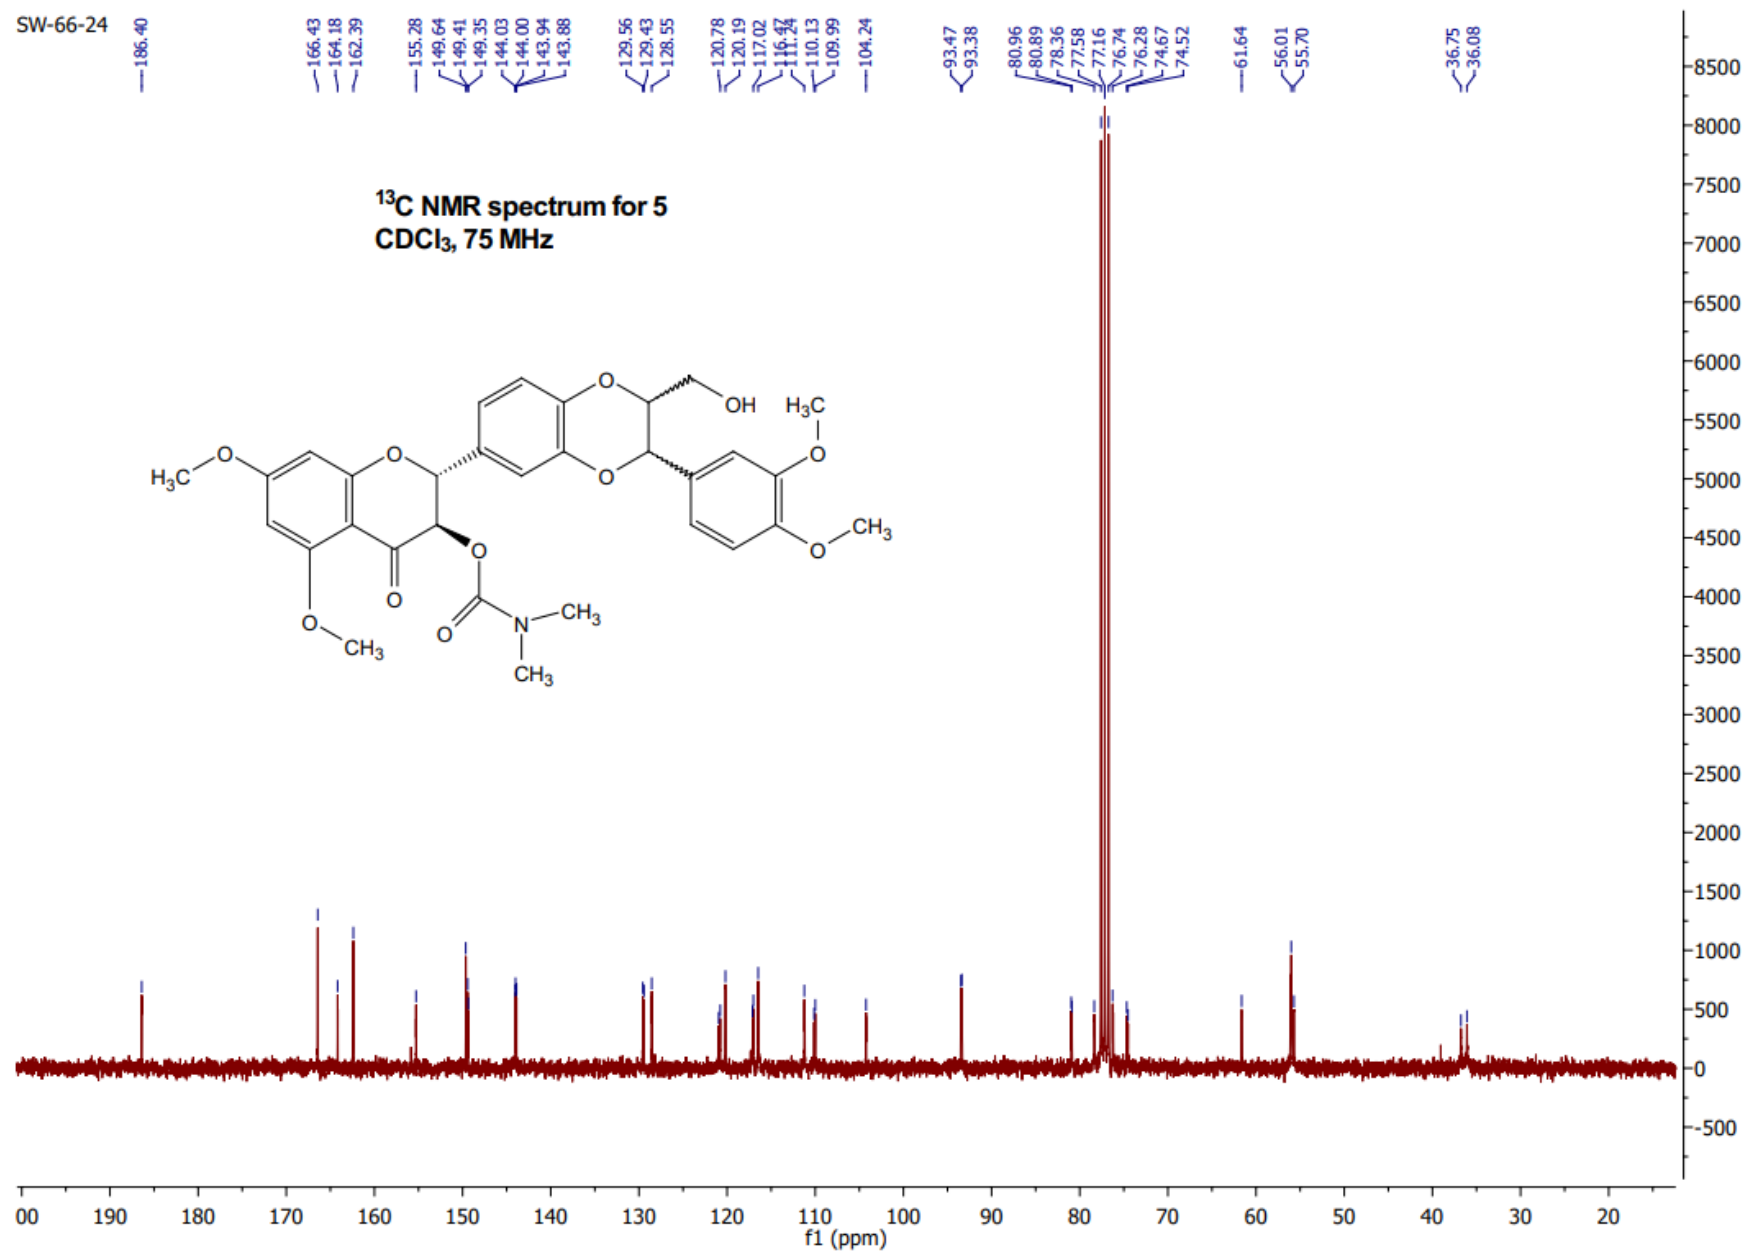

Figure S2:  $^{13}\text{C}$  NMR spectrum of **5** in  $\text{CDCl}_3$



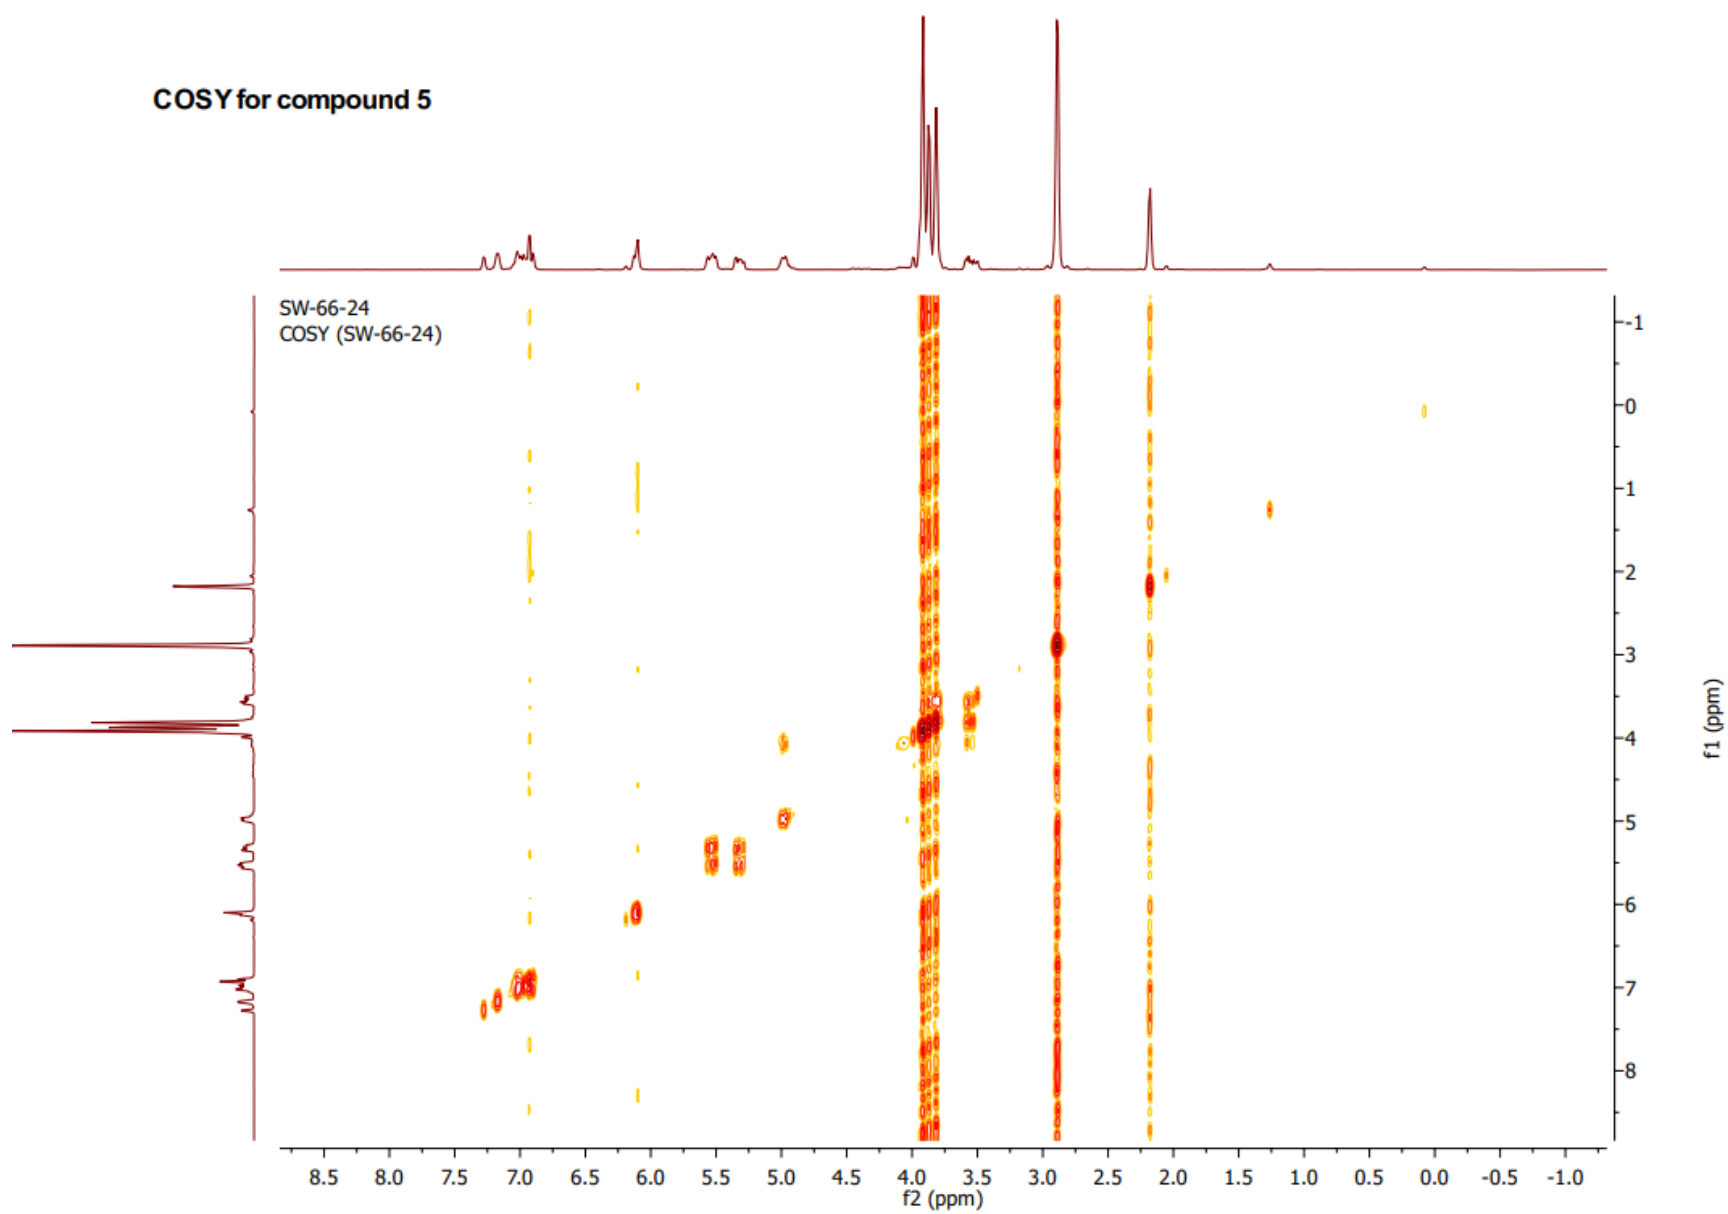

**Figure S3:** COSY spectrum of **5** in  $\text{CDCl}_3$

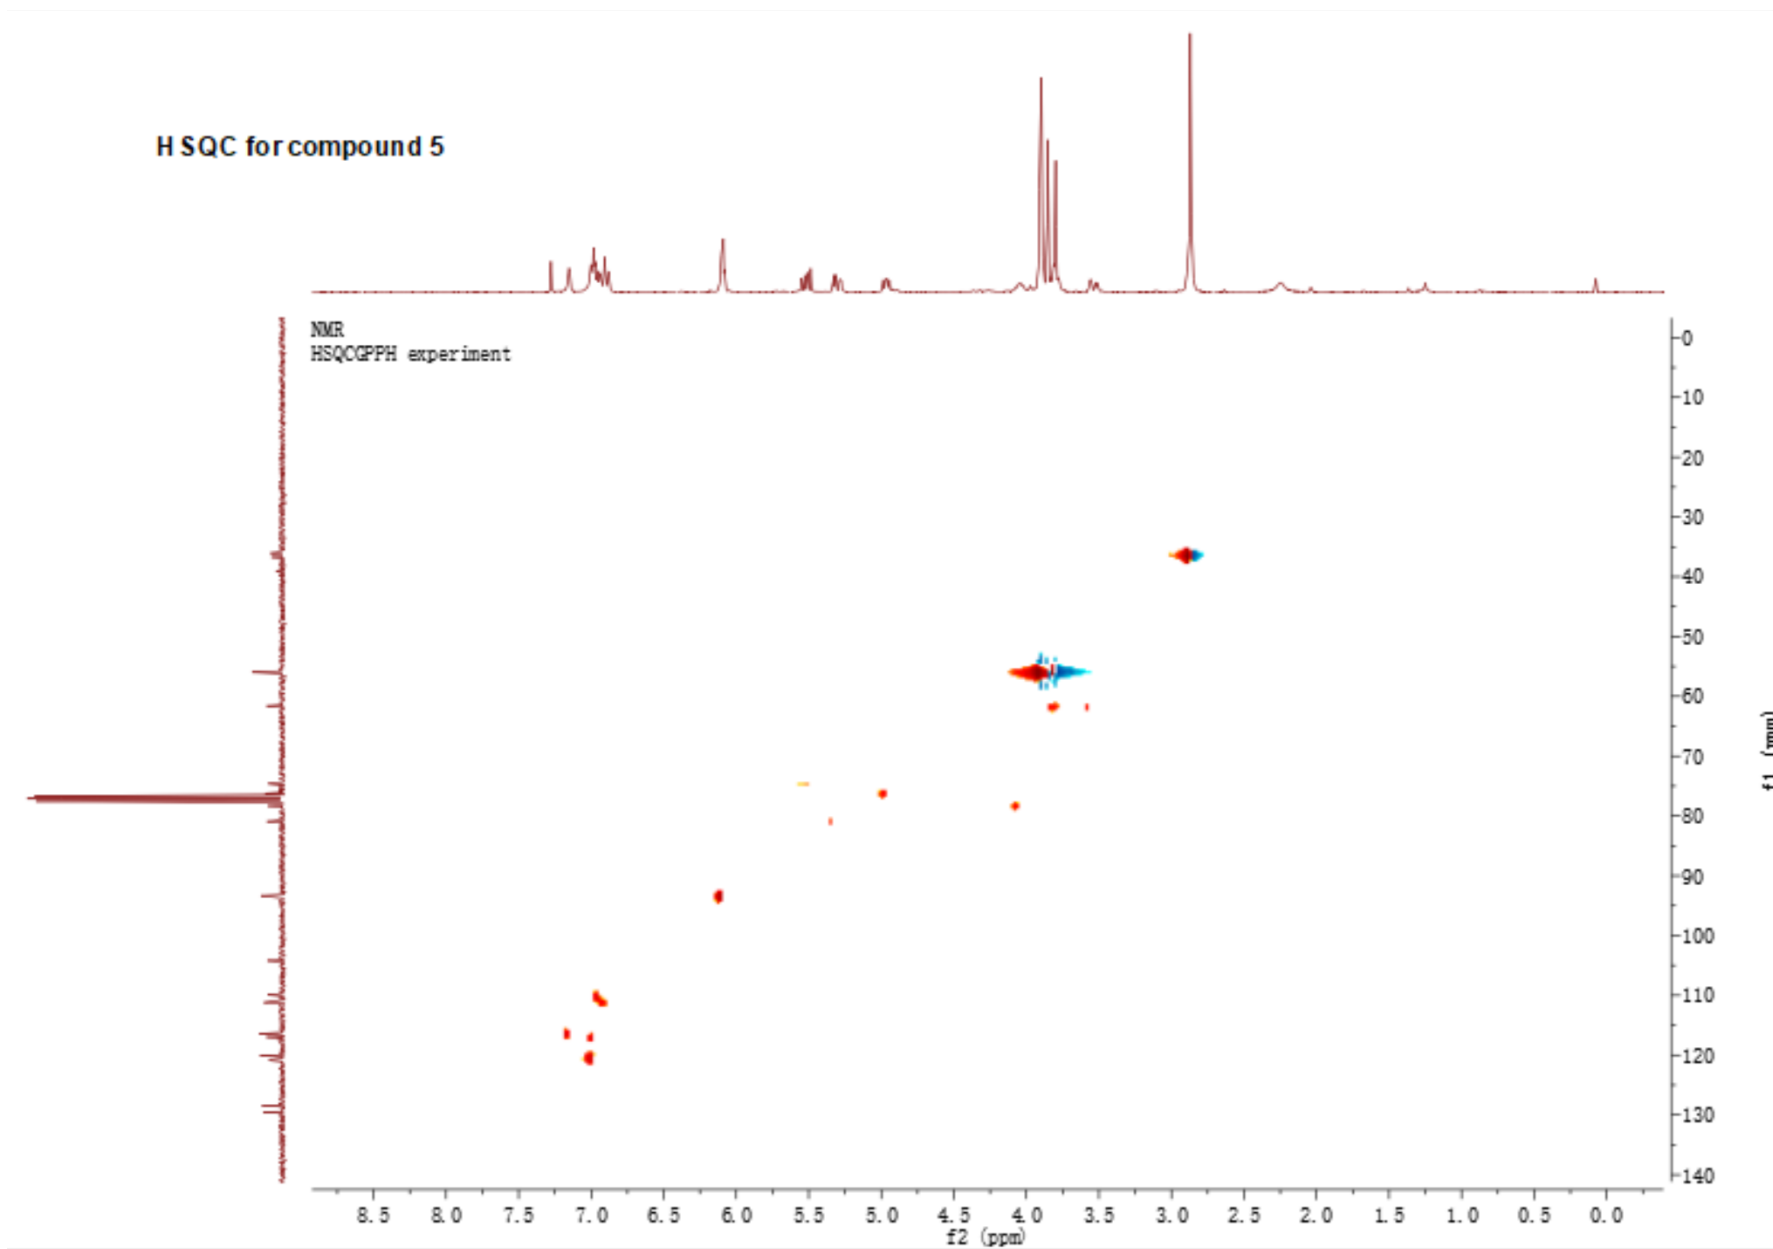

**Figure S4:** HSQC spectrum of **5** in  $\text{CDCl}_3$

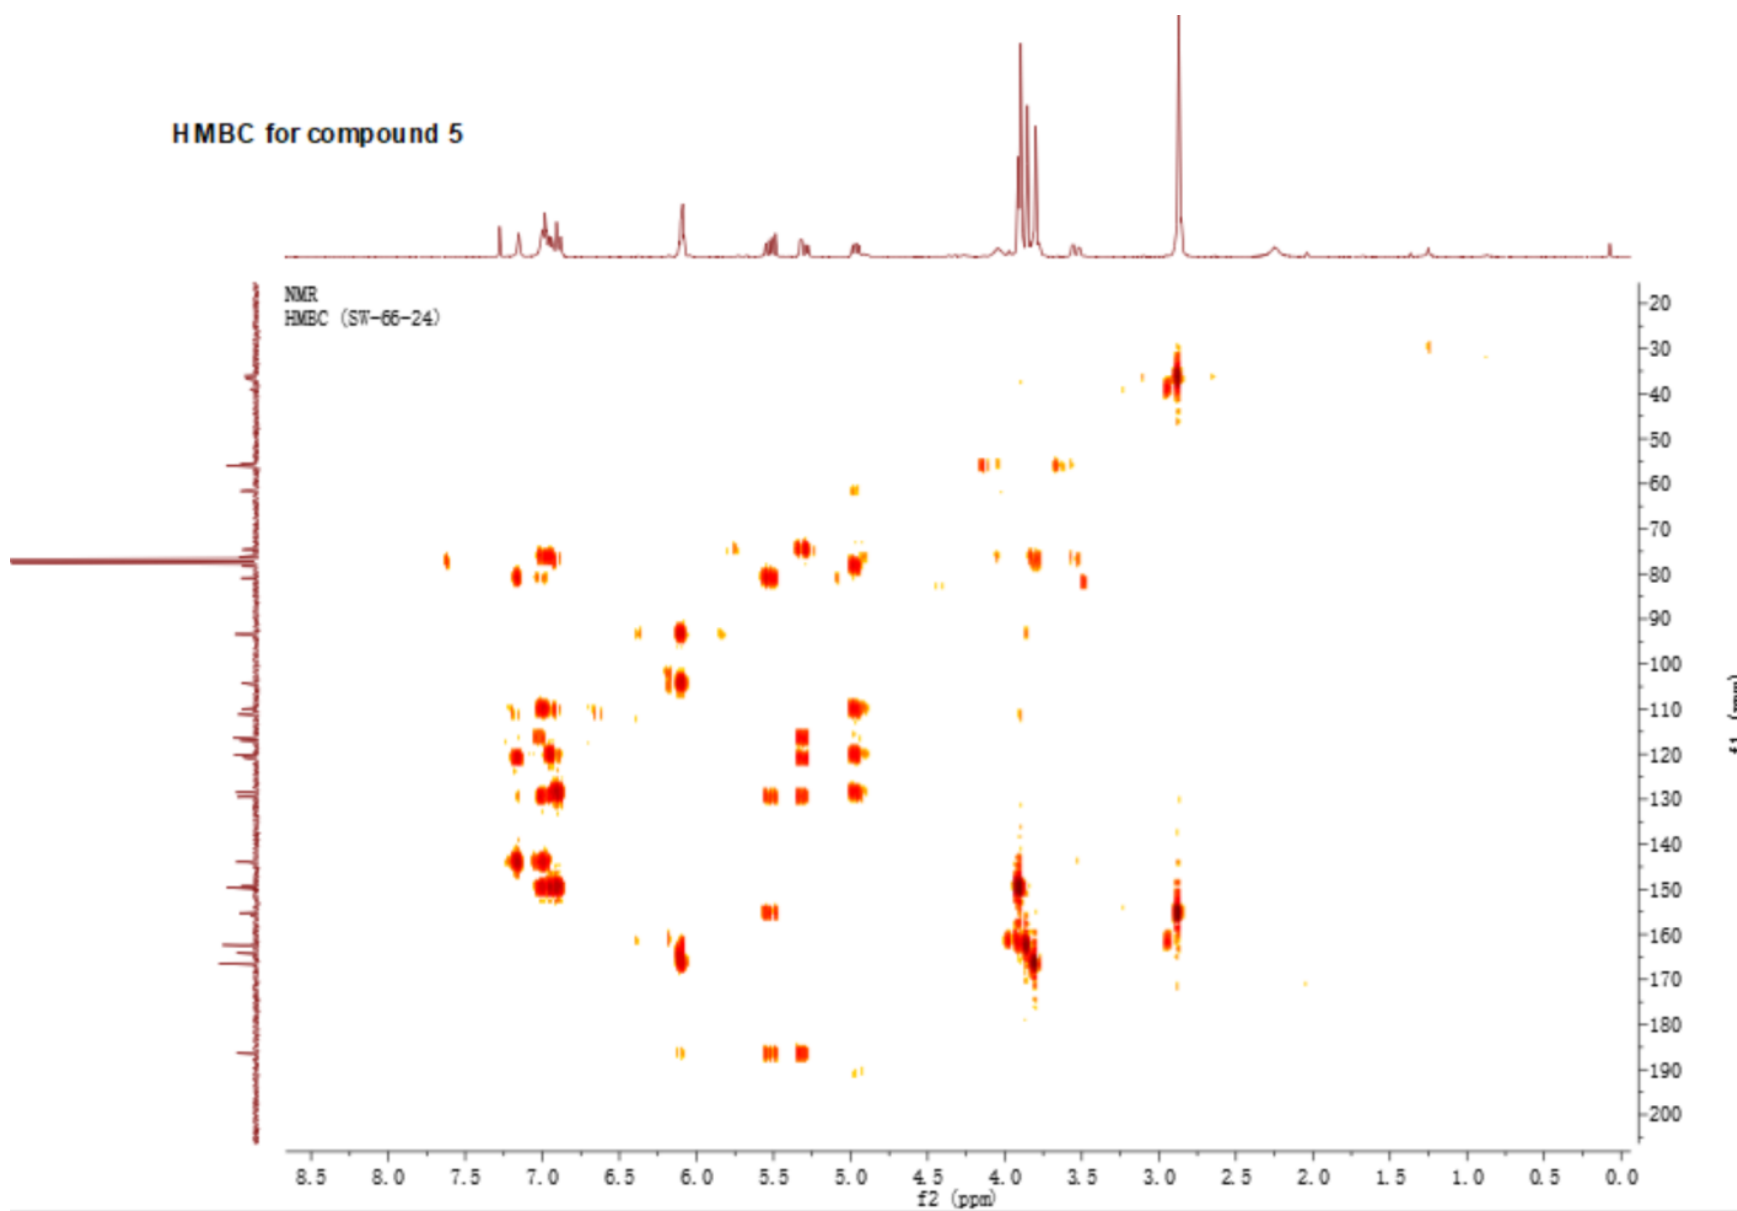

**Figure S5:** HMBC spectrum of **5** in  $\text{CDCl}_3$

| compds     | Mol. Formula                                     | Exact Mass | M+H      | Observed | delta   | ppm   |
|------------|--------------------------------------------------|------------|----------|----------|---------|-------|
| QGC-68-136 | C <sub>31</sub> H <sub>33</sub> NO <sub>11</sub> | 595.2054   | 596.2132 | 596.2128 | -0.0004 | -0.69 |

qgc-68-136 #2178-3544 RT: 12.82-19.90 AV: 1367 NL: 3.63E8  
T: FTMS + c NSI Full ms [150.0000-1000.0000]

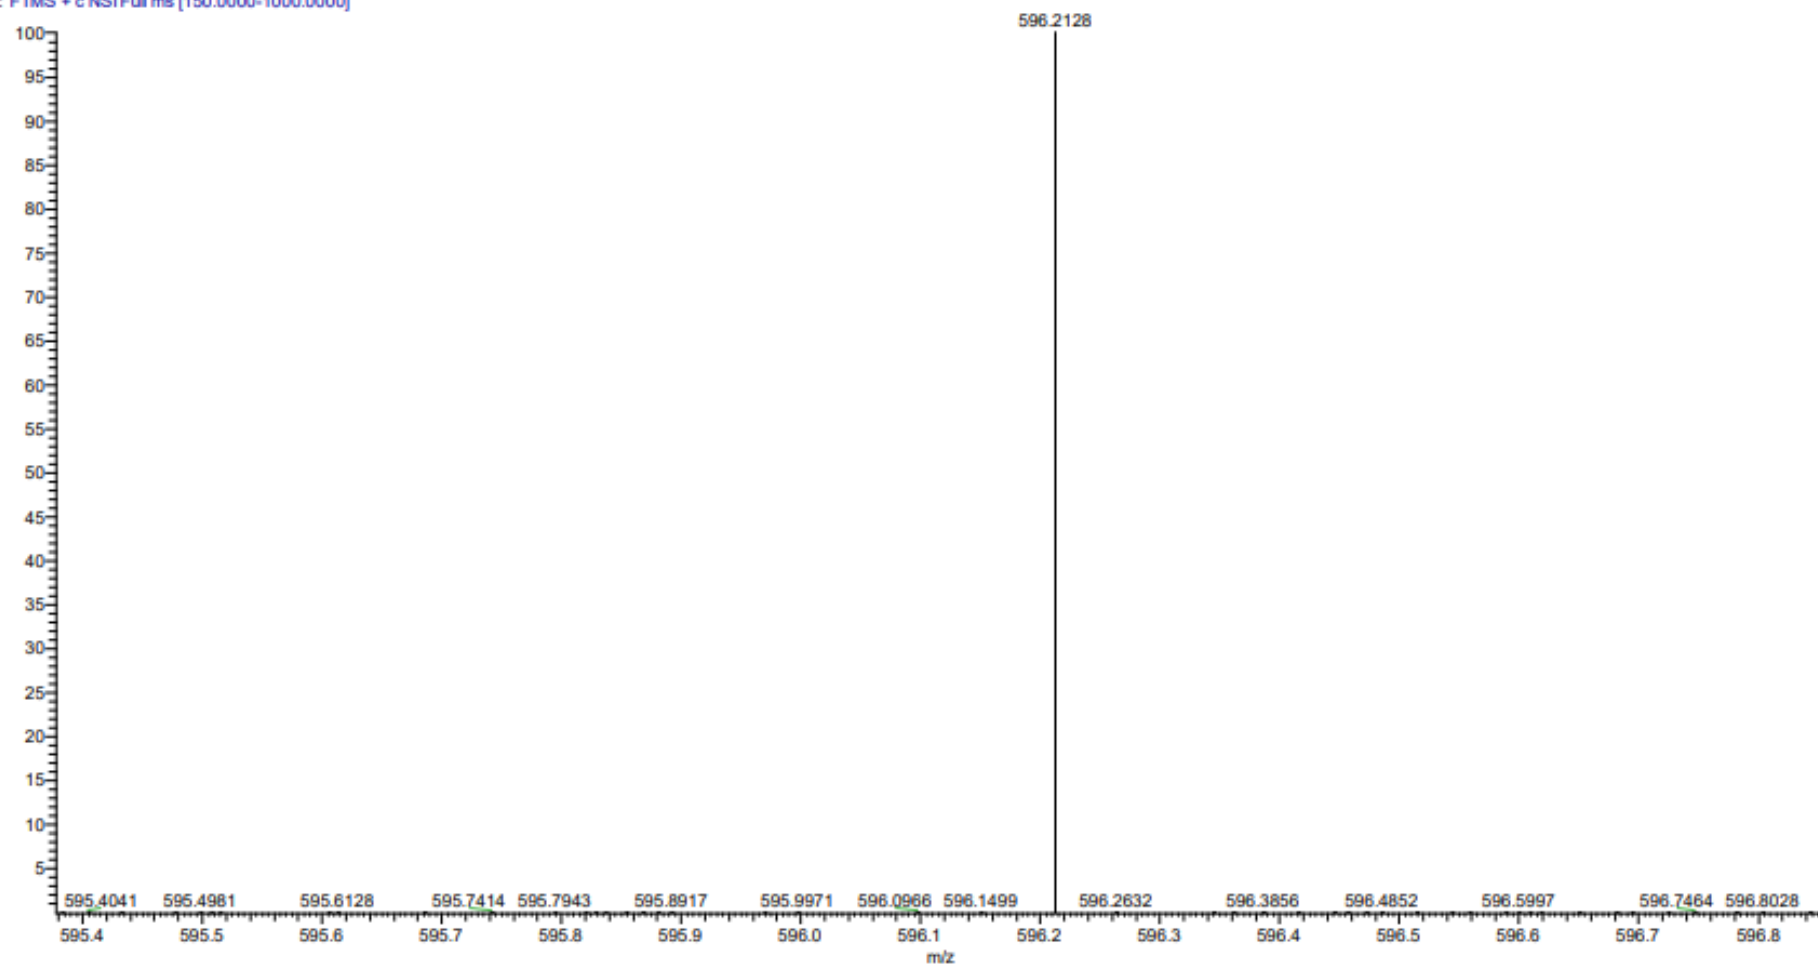

**Figure S6:** High resolution mass spectrum of **5**

=====

|                |                                 |                   |
|----------------|---------------------------------|-------------------|
| Injection Date | : 9/17/2021 4:49:32 PM          |                   |
| Sample Name    | : SW-66-24                      | Location : Vial 1 |
| Acq. Operator  | :                               |                   |
| Method         | : C:\HPCHEM\1\METHODS\JNP2015.M |                   |
| Last changed   | : 9/17/2021 4:42:01 PM          |                   |
|                | (modified after loading)        |                   |

=====

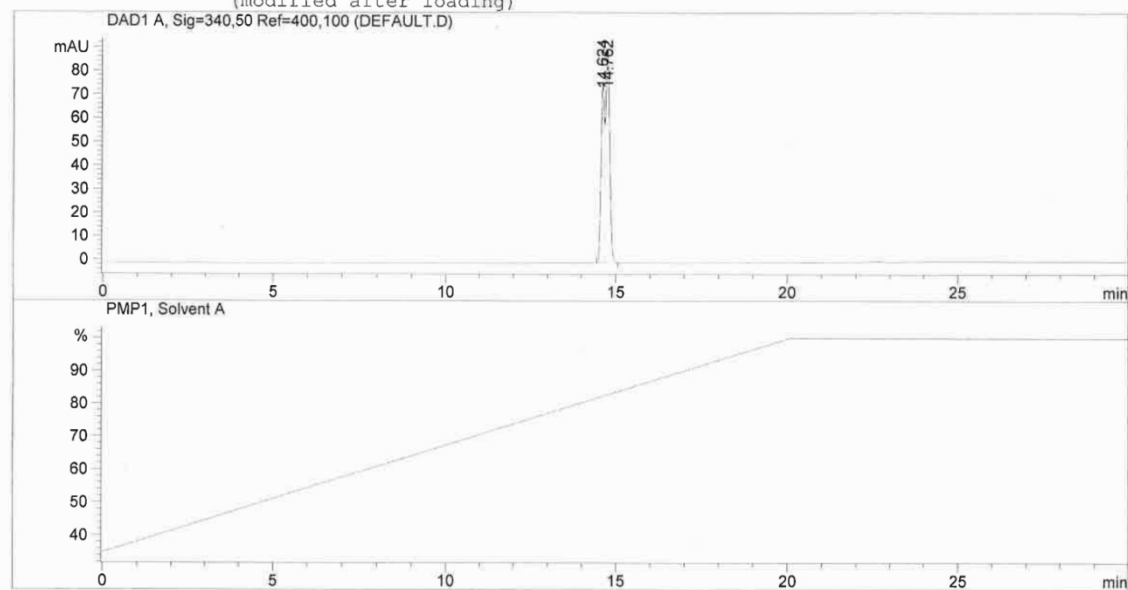

=====  
Area Percent Report  
=====

Sorted By : Signal  
Multiplier : 1.0000  
Dilution : 1.0000

Signal 1: DAD1 A, Sig=340,50 Ref=400,100

| Peak # | RetTime [min] | Type | Width [min] | Area [mAU*s] | Height [mAU] | Area %  |
|--------|---------------|------|-------------|--------------|--------------|---------|
| 1      | 14.624        | BV   | 0.1086      | 539.64001    | 76.22746     | 42.6786 |
| 2      | 14.762        | VB   | 0.1216      | 724.78864    | 90.29533     | 57.3214 |

Totals : 1264.42865 166.52280

Results obtained with enhanced integrator!

=====  
\*\*\* End of Report \*\*\*

Figure S7: HPLC chromatogram of 5

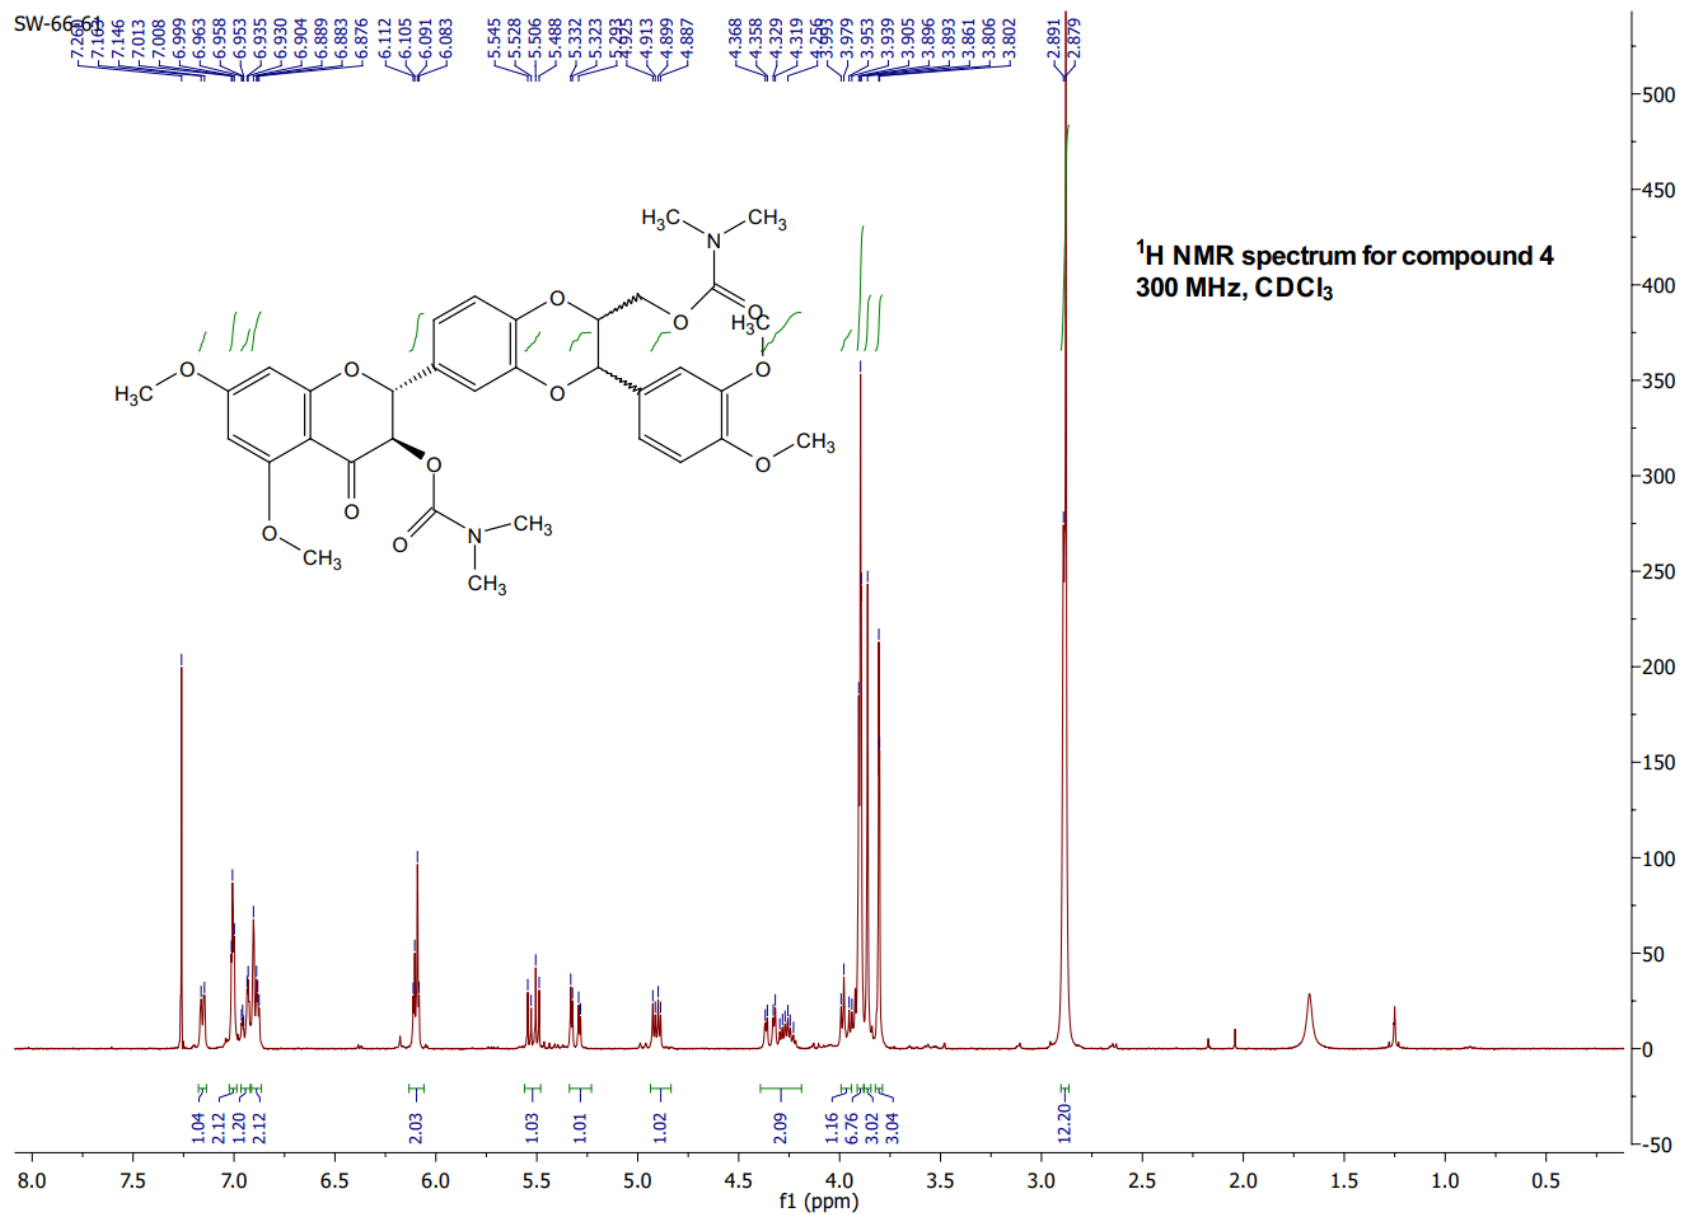

**Figure S8:** <sup>1</sup>H NMR spectrum of **4** in CDCl<sub>3</sub>

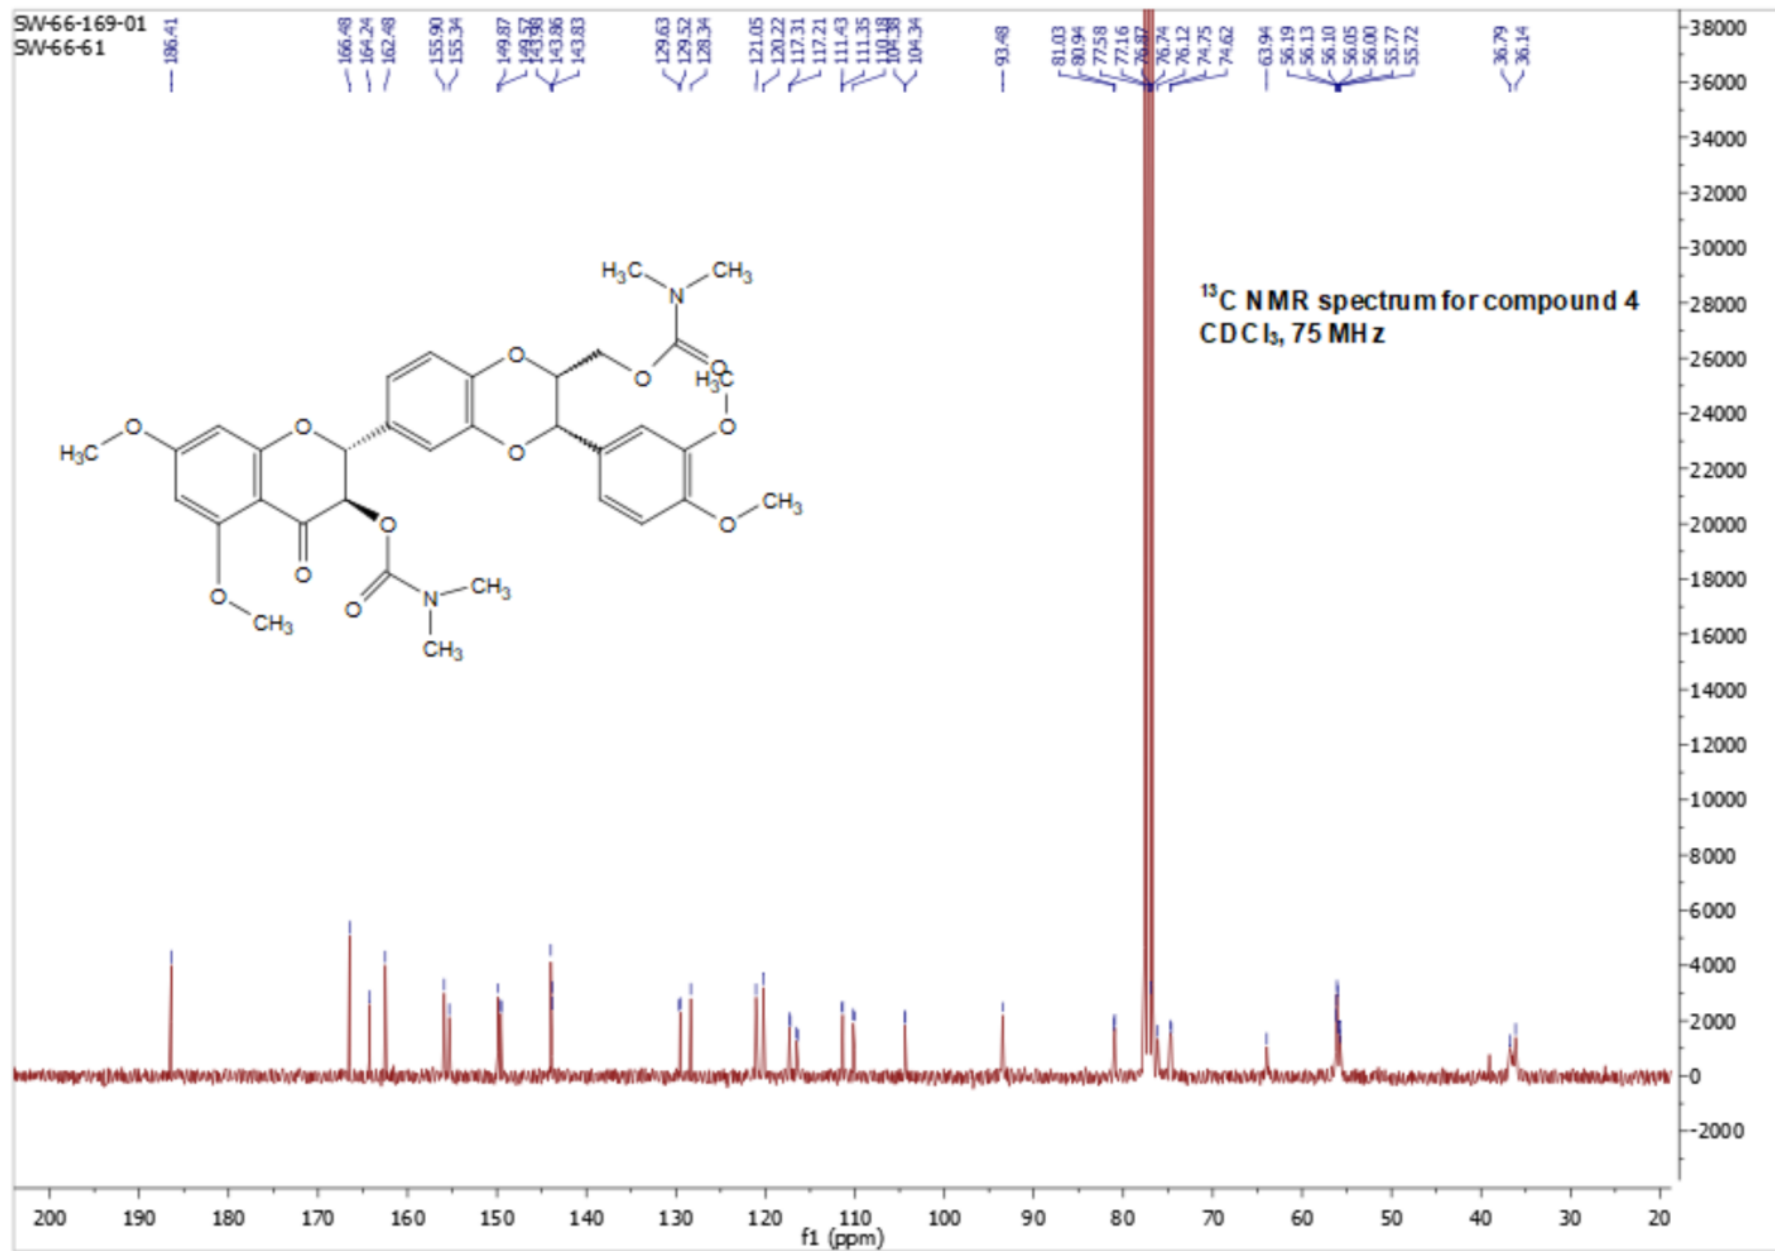

Figure S9: <sup>13</sup>C NMR spectrum of 4 in CDCl<sub>3</sub>

| compds   | Mol. Formula                                                   | Exact<br>Mass | M+H      | Observed        | delta   | ppm   |
|----------|----------------------------------------------------------------|---------------|----------|-----------------|---------|-------|
| SW-66-61 | C <sub>34</sub> H <sub>38</sub> N <sub>2</sub> O <sub>12</sub> | 666.2425      | 667.2503 | <b>667.2498</b> | -0.0005 | -0.81 |

SW-66-61 #2203-2839 RT: 11.59-14.92 AV: 637 NL: 2.36E8  
T: FTMS + c NSI Full ms [150.0000-1000.0000]

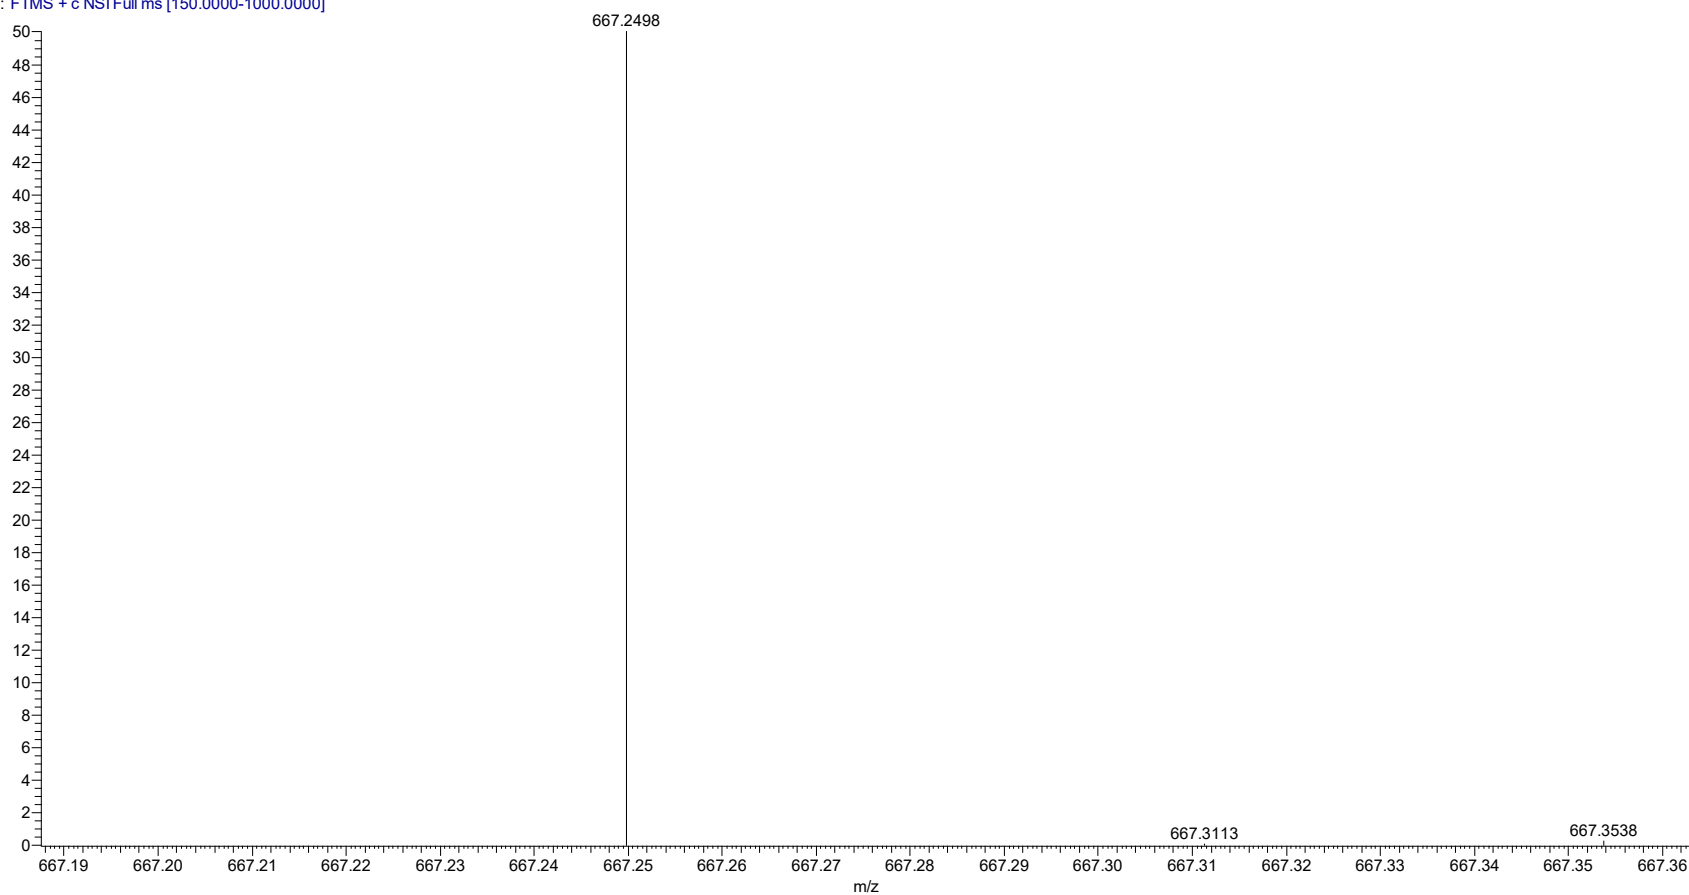

**Figure S10:** High resolution mass spectrum of **4**



```
=====
Injection Date   : 9/16/2021 2:21:42 PM
Sample Name      : SW-66-61                Location : Vial 1
Acq. Operator    :
Method           : C:\HPCHEM\1\METHODS\JNP2015.M
Last changed     : 9/16/2021 2:14:33 PM
                  (modified after loading)
=====
```

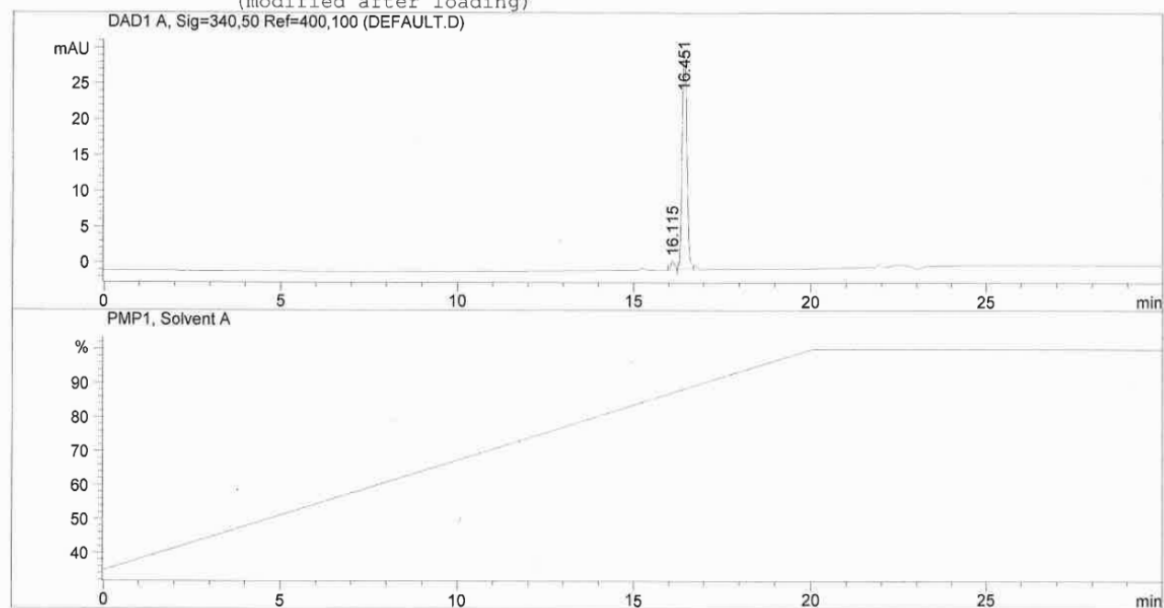

```
=====
Area Percent Report
=====
```

```
Sorted By      :      Signal
Multiplier     :      1.0000
Dilution       :      1.0000
```

Signal 1: DAD1 A, Sig=340,50 Ref=400,100

| Peak # | RetTime [min] | Type | Width [min] | Area [mAU*s] | Height [mAU] | Area %  |
|--------|---------------|------|-------------|--------------|--------------|---------|
| 1      | 16.115        | PV   | 0.1108      | 9.05094      | 1.27589      | 3.0535  |
| 2      | 16.451        | VB   | 0.1501      | 287.36374    | 30.44066     | 96.9465 |

```
Totals :                296.41468  31.71655
```

Results obtained with enhanced integrator!

```
=====
*** End of Report ***
=====
```

Figure S11: HPLC chromatogram of 4

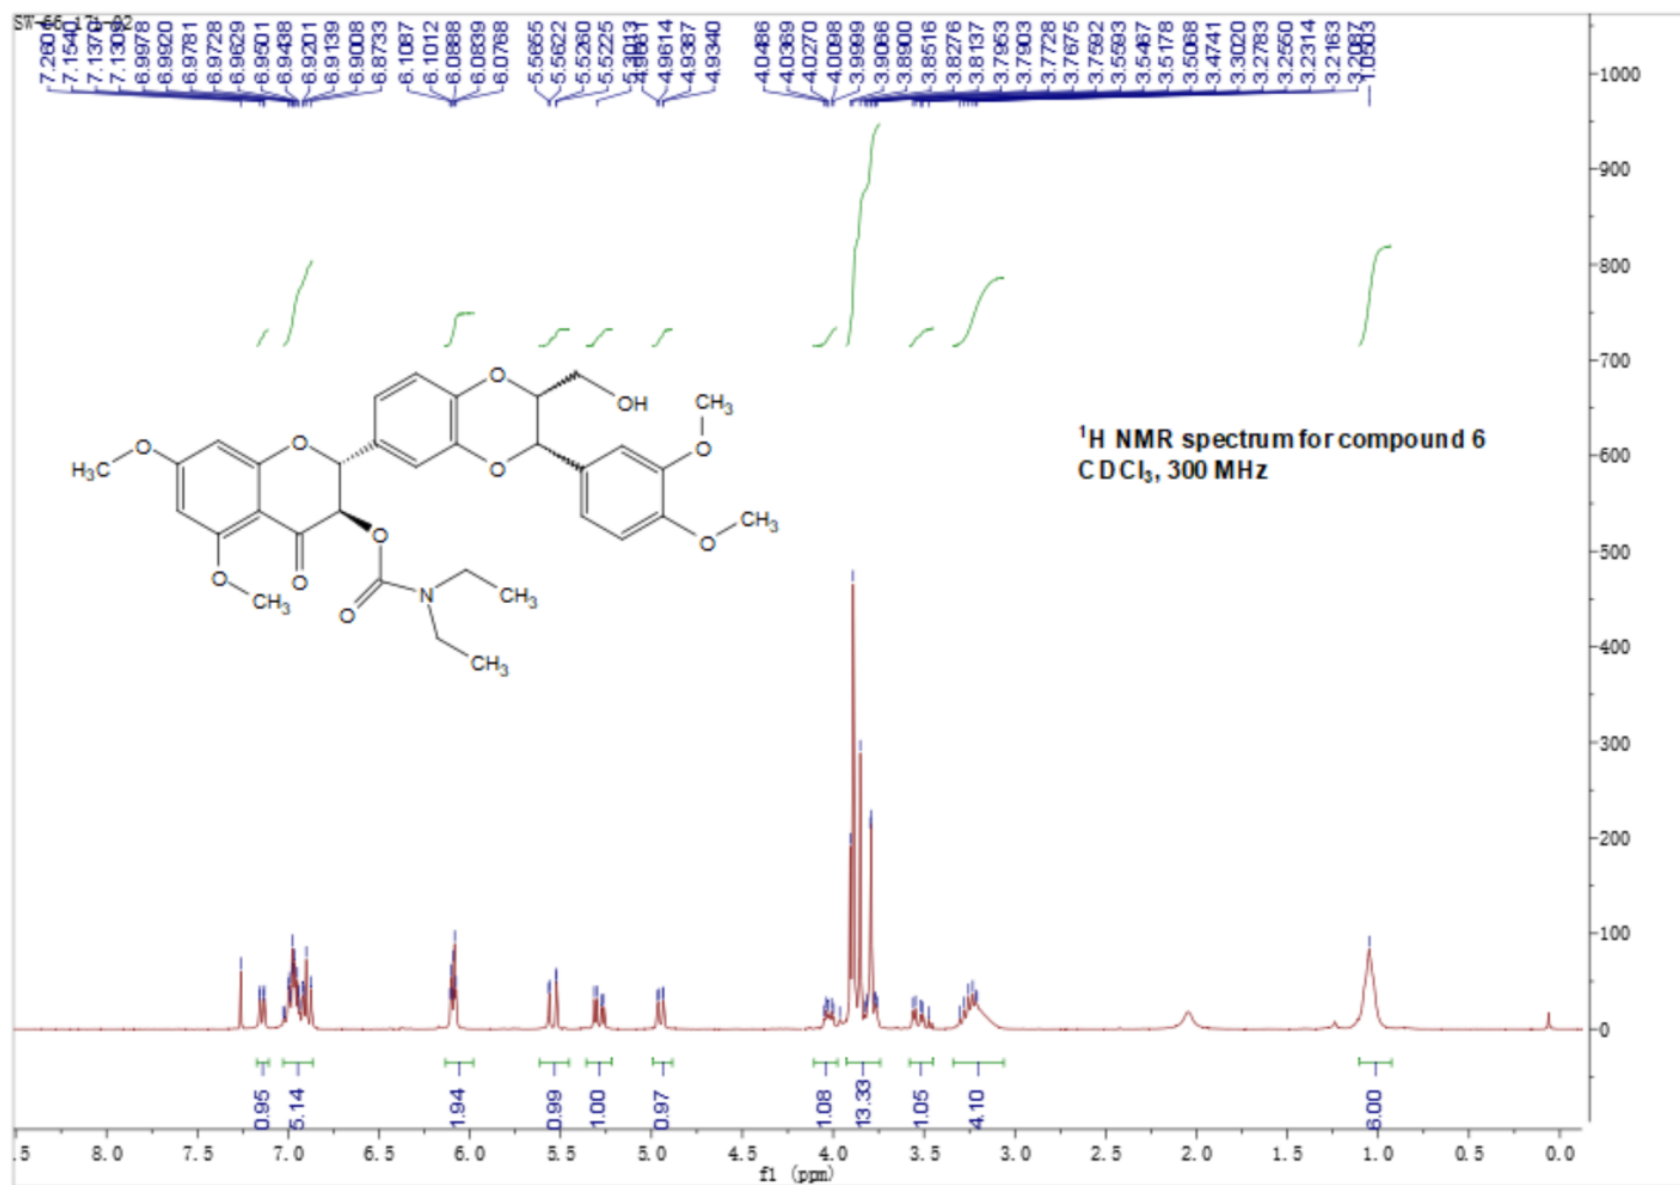

**Figure S12:** <sup>1</sup>H NMR spectrum of **6** in CDCl<sub>3</sub>

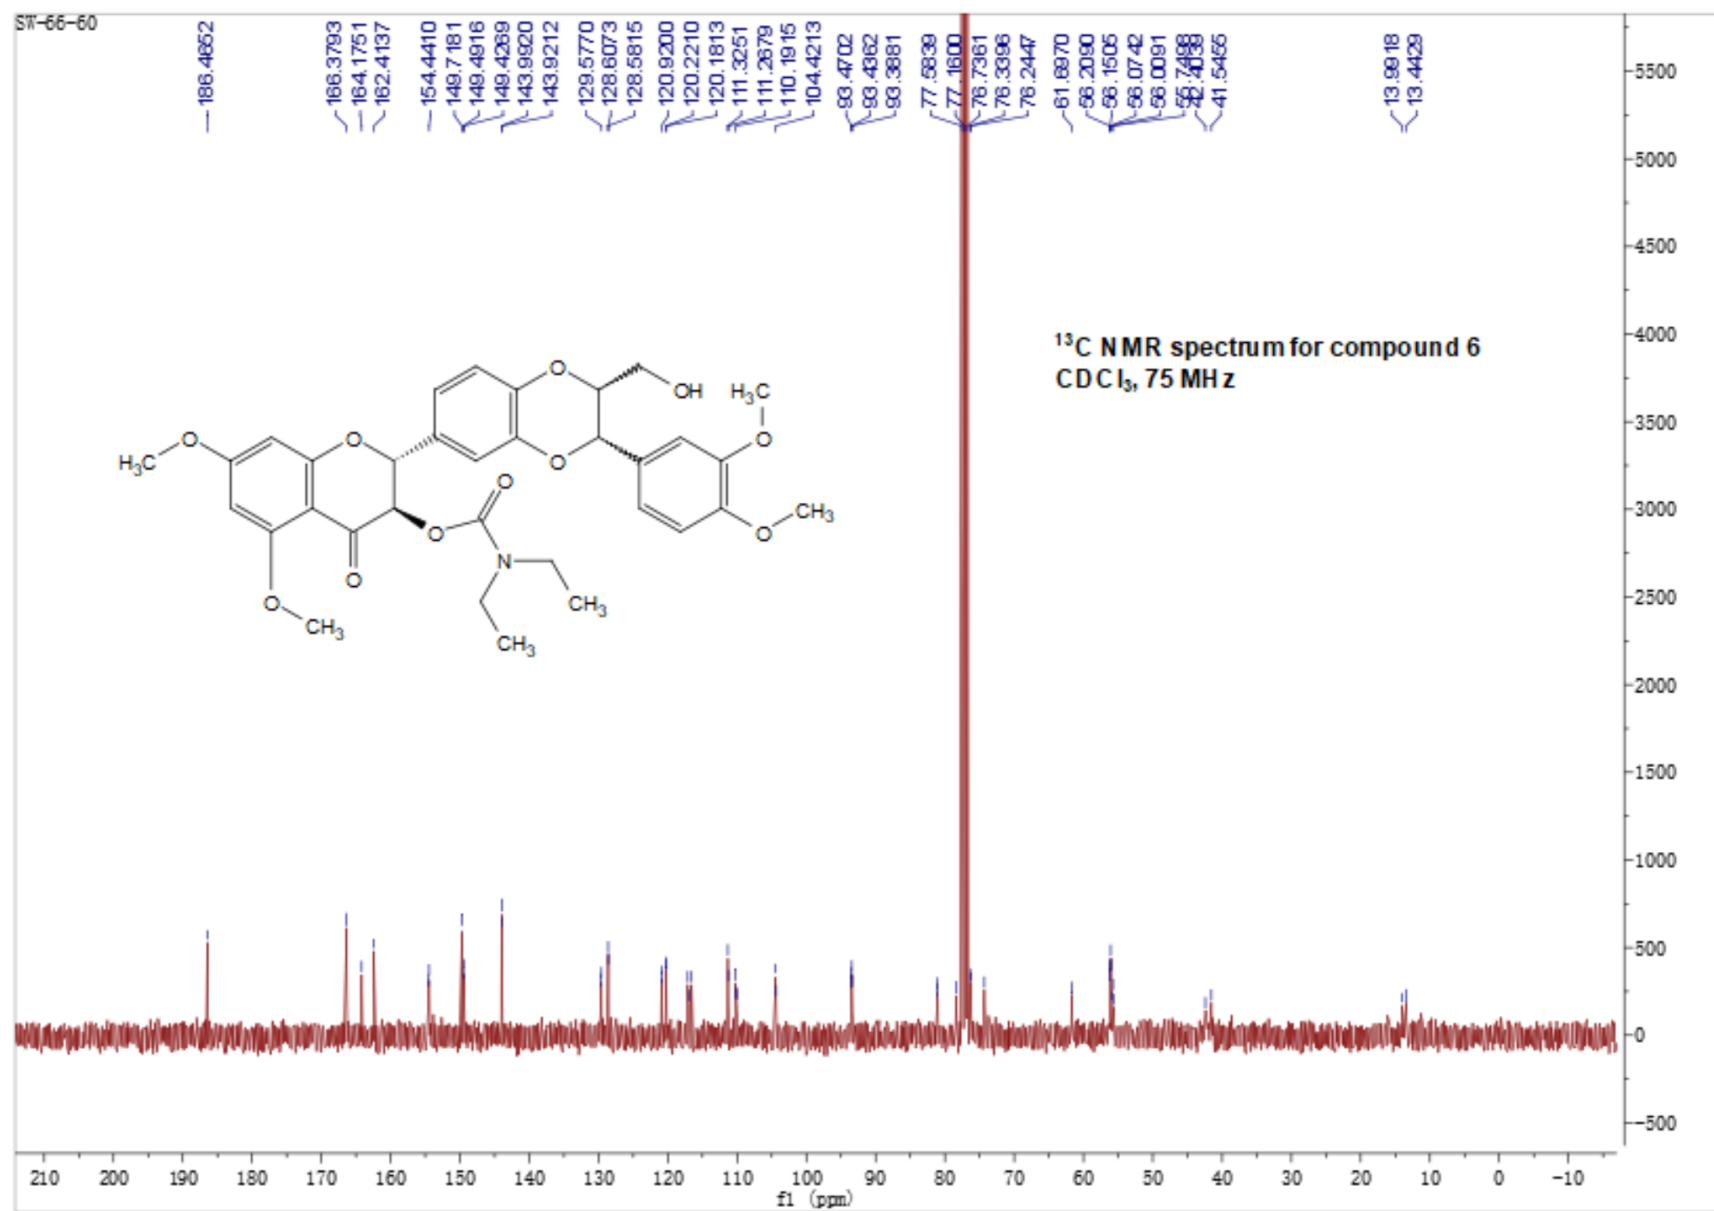

Figure S13: <sup>13</sup>C NMR spectrum of 6 in CDCl<sub>3</sub>

| compds   | Mol. Formula | Exact Mass | M+H      | Observed        | delta   | ppm   |
|----------|--------------|------------|----------|-----------------|---------|-------|
| SW-66-60 | C33H37NO11   | 623.2367   | 624.2445 | <b>624.2443</b> | -0.0002 | -0.34 |

SW-66-60 #2101-2856 RT: 11.05-15.01 AV: 756 NL: 2.46E8  
T: FTMS + c NSI Full ms [150.0000-1000.0000]

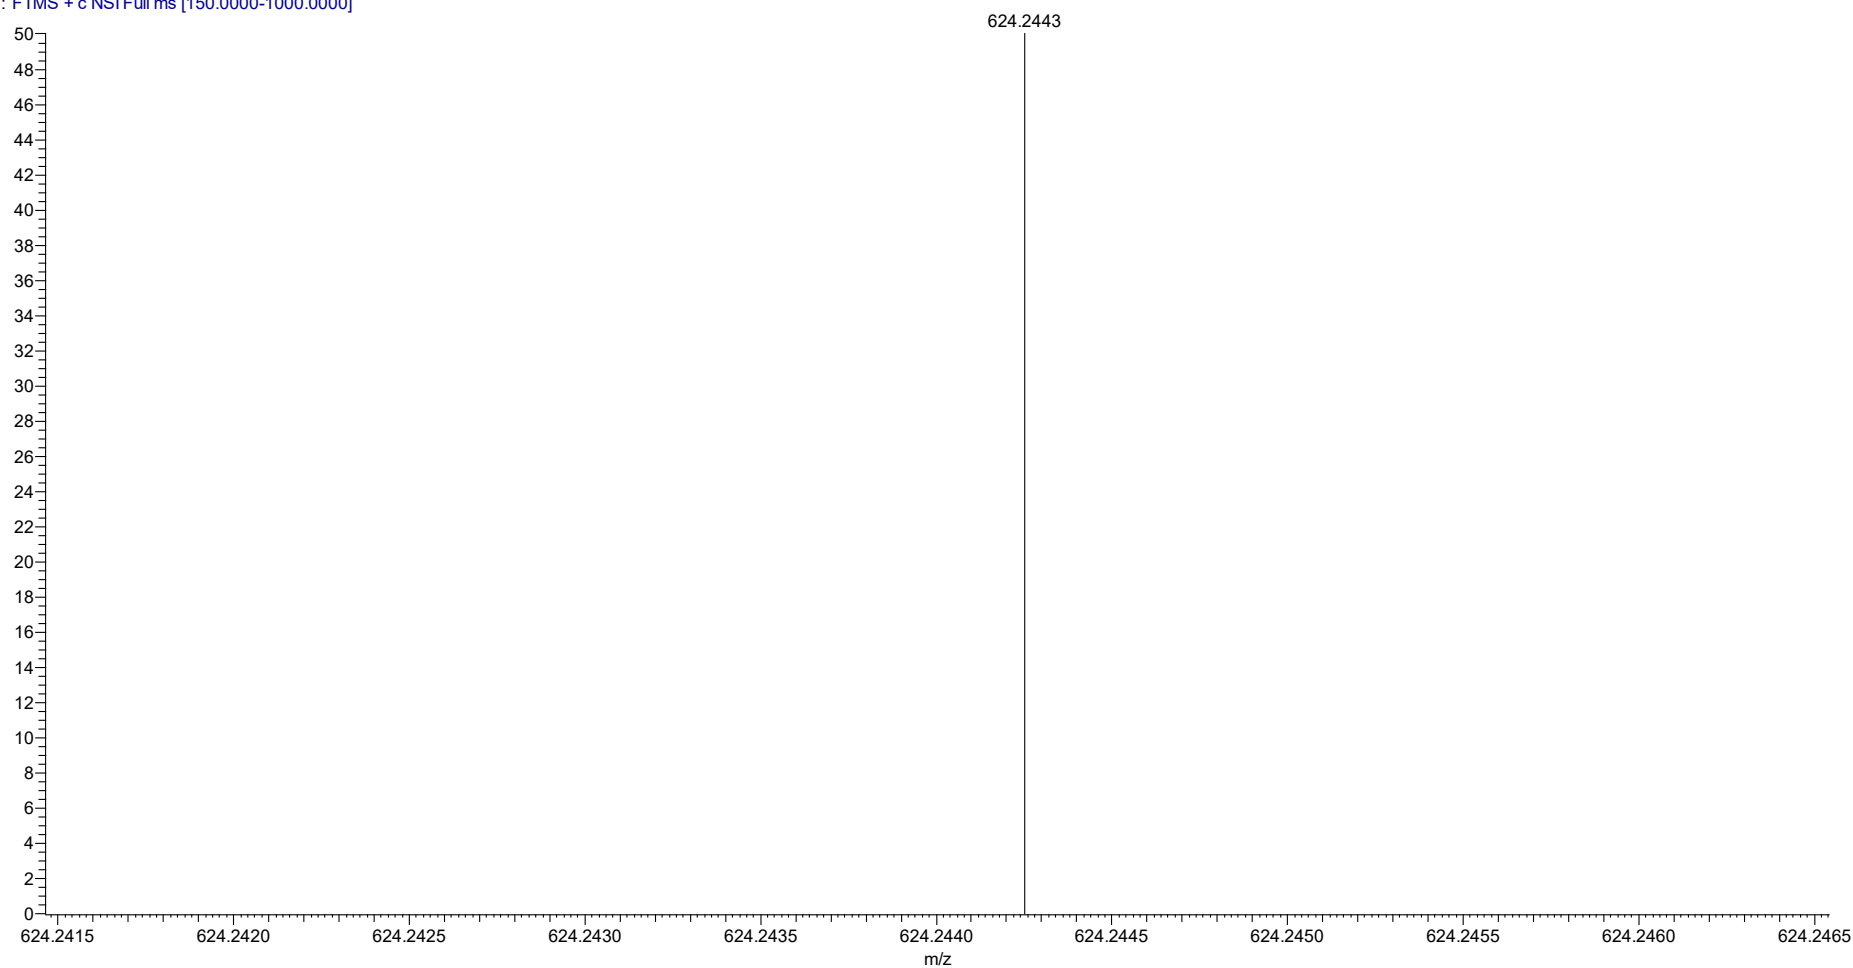

**Figure S14:** High resolution mass spectrum of **6**

=====  
Injection Date : 9/16/2021 3:34:17 PM  
Sample Name : SW-66-60 Location : Vial 1  
Acq. Operator :  
Method : C:\HPCHEM\1\METHODS\JNP2015.M  
Last changed : 9/16/2021 3:26:08 PM  
(modified after loading)  
=====

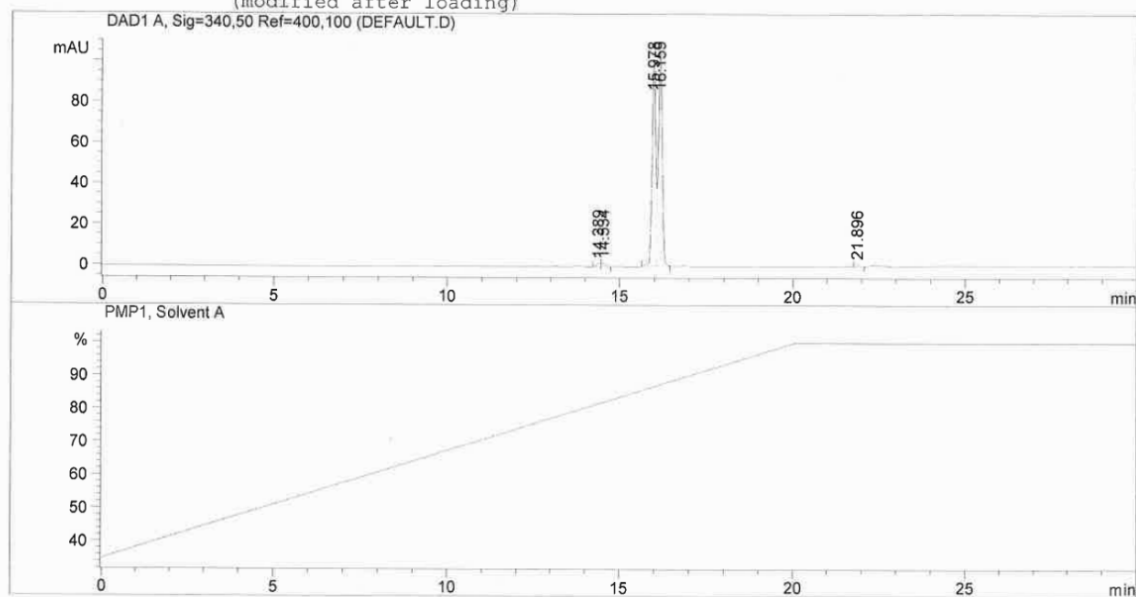

=====  
Area Percent Report  
=====

Sorted By : Signal  
Multiplier : 1.0000  
Dilution : 1.0000

Signal 1: DAD1 A, Sig=340,50 Ref=400,100

| Peak # | RetTime [min] | Type | Width [min] | Area [mAU*s] | Height [mAU] | Area %  |
|--------|---------------|------|-------------|--------------|--------------|---------|
| 1      | 14.389        | PV   | 0.1156      | 12.35465     | 1.64579      | 0.7808  |
| 2      | 14.534        | VB   | 0.1193      | 13.75756     | 1.72044      | 0.8695  |
| 3      | 15.978        | BV   | 0.1128      | 744.94830    | 100.14996    | 47.0812 |
| 4      | 16.159        | VB   | 0.1149      | 802.74286    | 105.38542    | 50.7339 |
| 5      | 21.896        | BP   | 0.0996      | 8.45884      | 1.34011      | 0.5346  |

Totals : 1582.26220 210.24171

Results obtained with enhanced integrator!

=====  
\*\*\* End of Report \*\*\*

Figure S15: HPLC chromatogram of 6

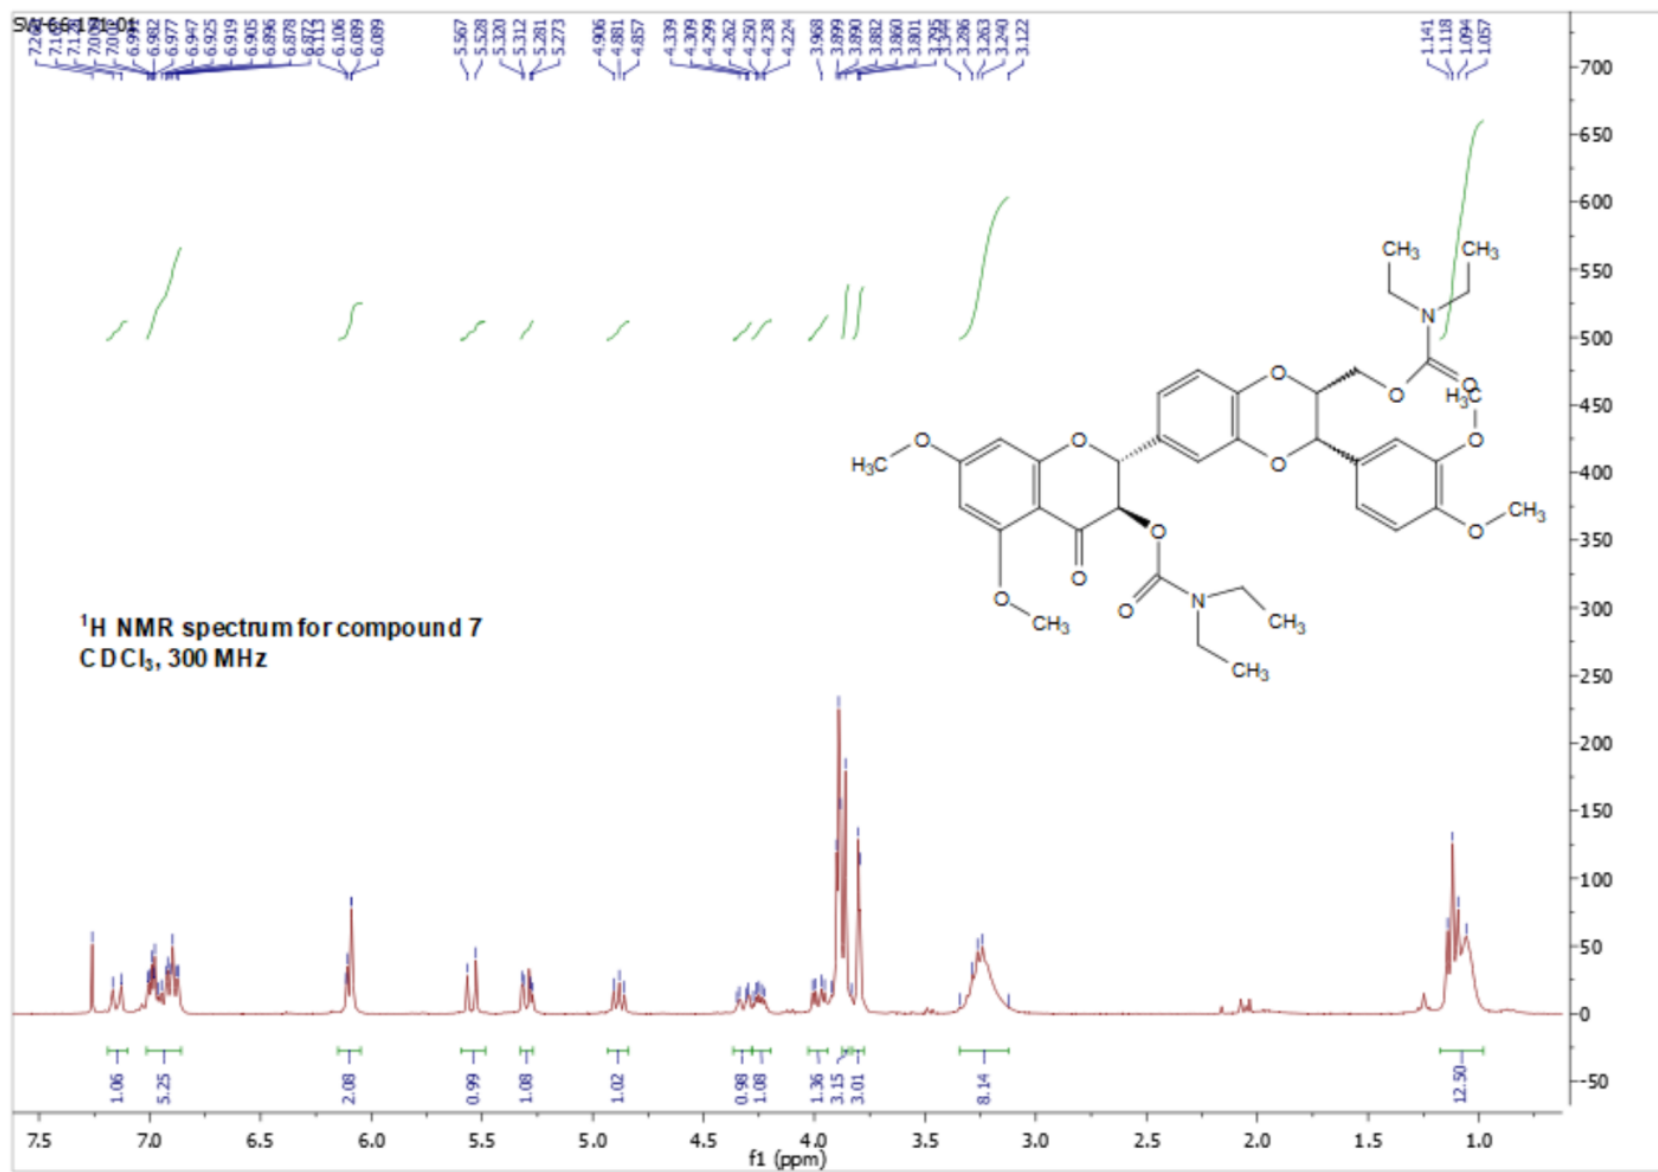

Figure S16: <sup>1</sup>H NMR spectrum of 7 in CDCl<sub>3</sub>

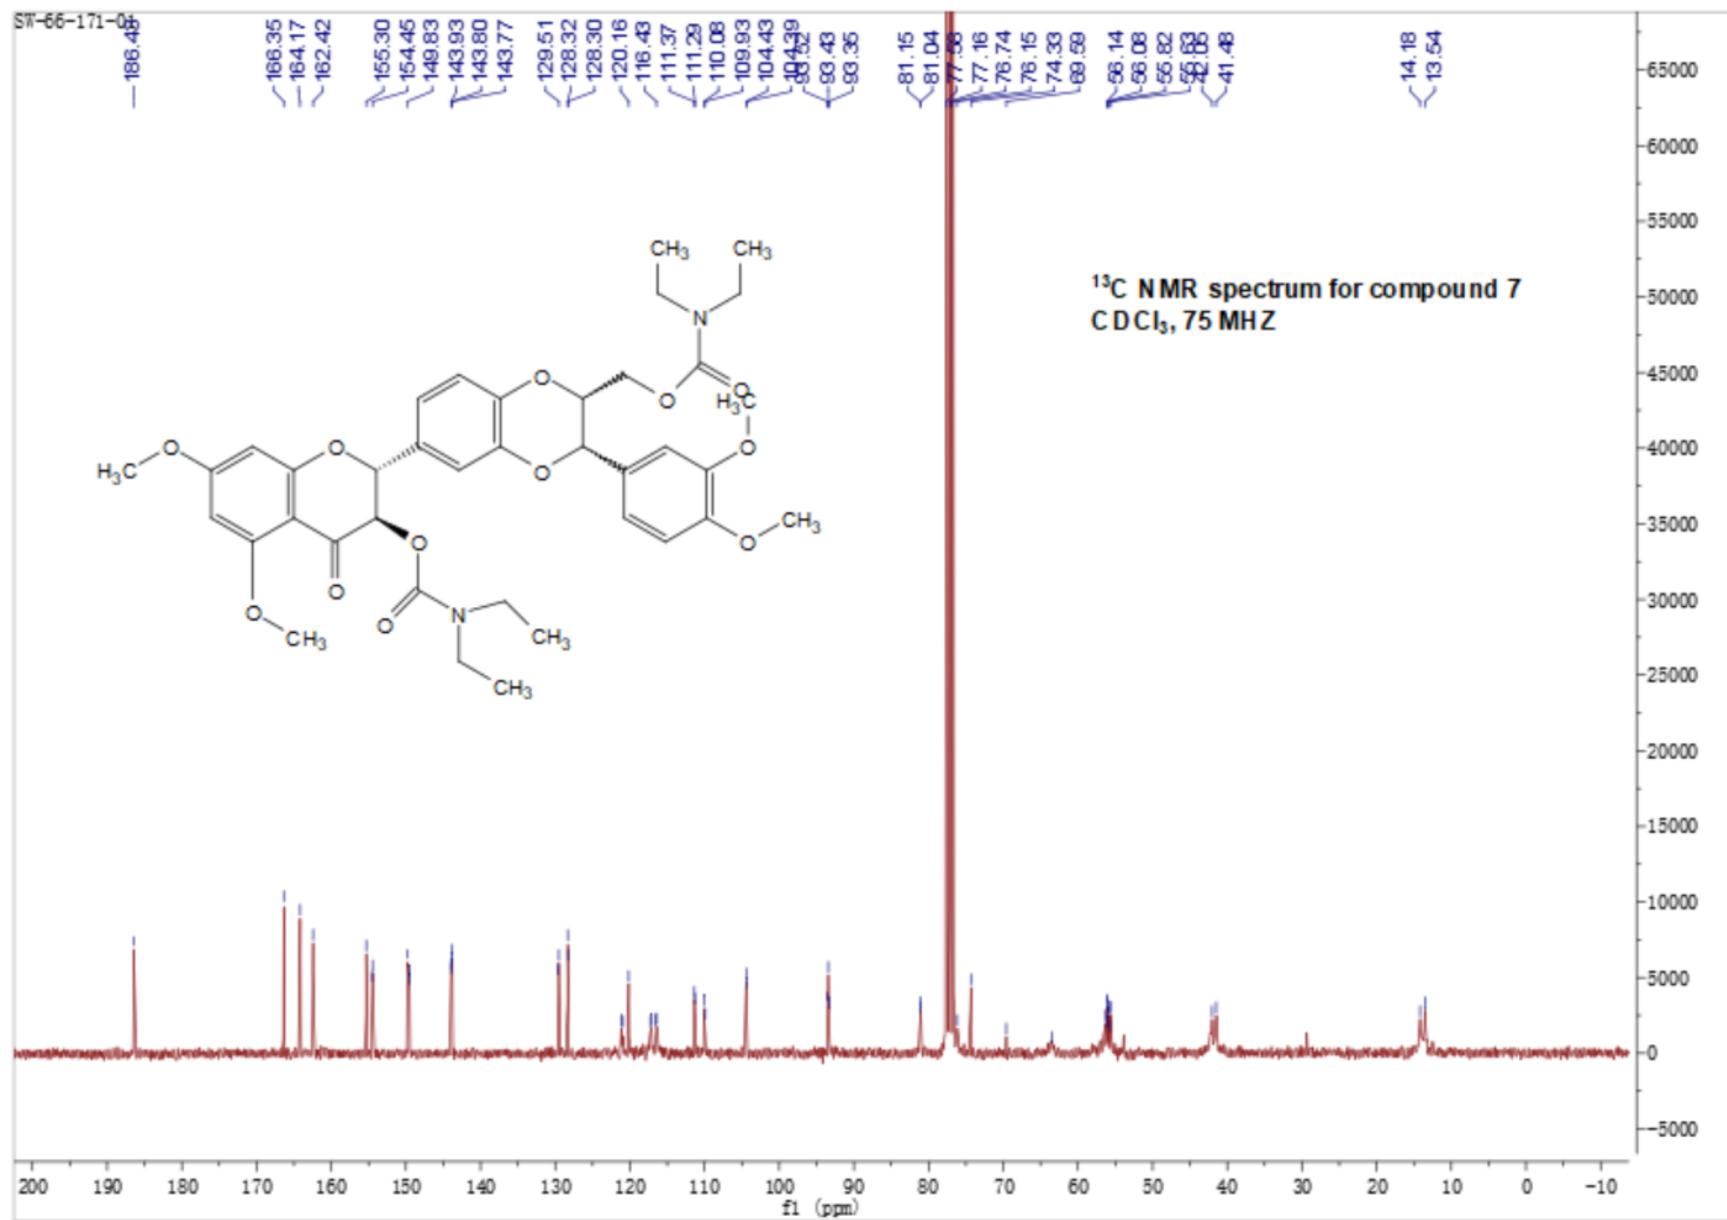

Figure S17: <sup>13</sup>C NMR spectrum of 7 in CDCl<sub>3</sub>

| Sample Name  | Mol Fomula  | MW       | M+H      | observed | delta  | ppm  |
|--------------|-------------|----------|----------|----------|--------|------|
| SW-66-171-01 | C38H46N2O12 | 722.3051 | 723.3129 | 723.3129 | 0.0000 | 0.00 |

SW-66-171-01 #2474-2537 RT: 13.37-13.69 AV: 64 NL: 1.28E8  
T: FTMS + c NSI Full ms [300.0000-1000.0000]

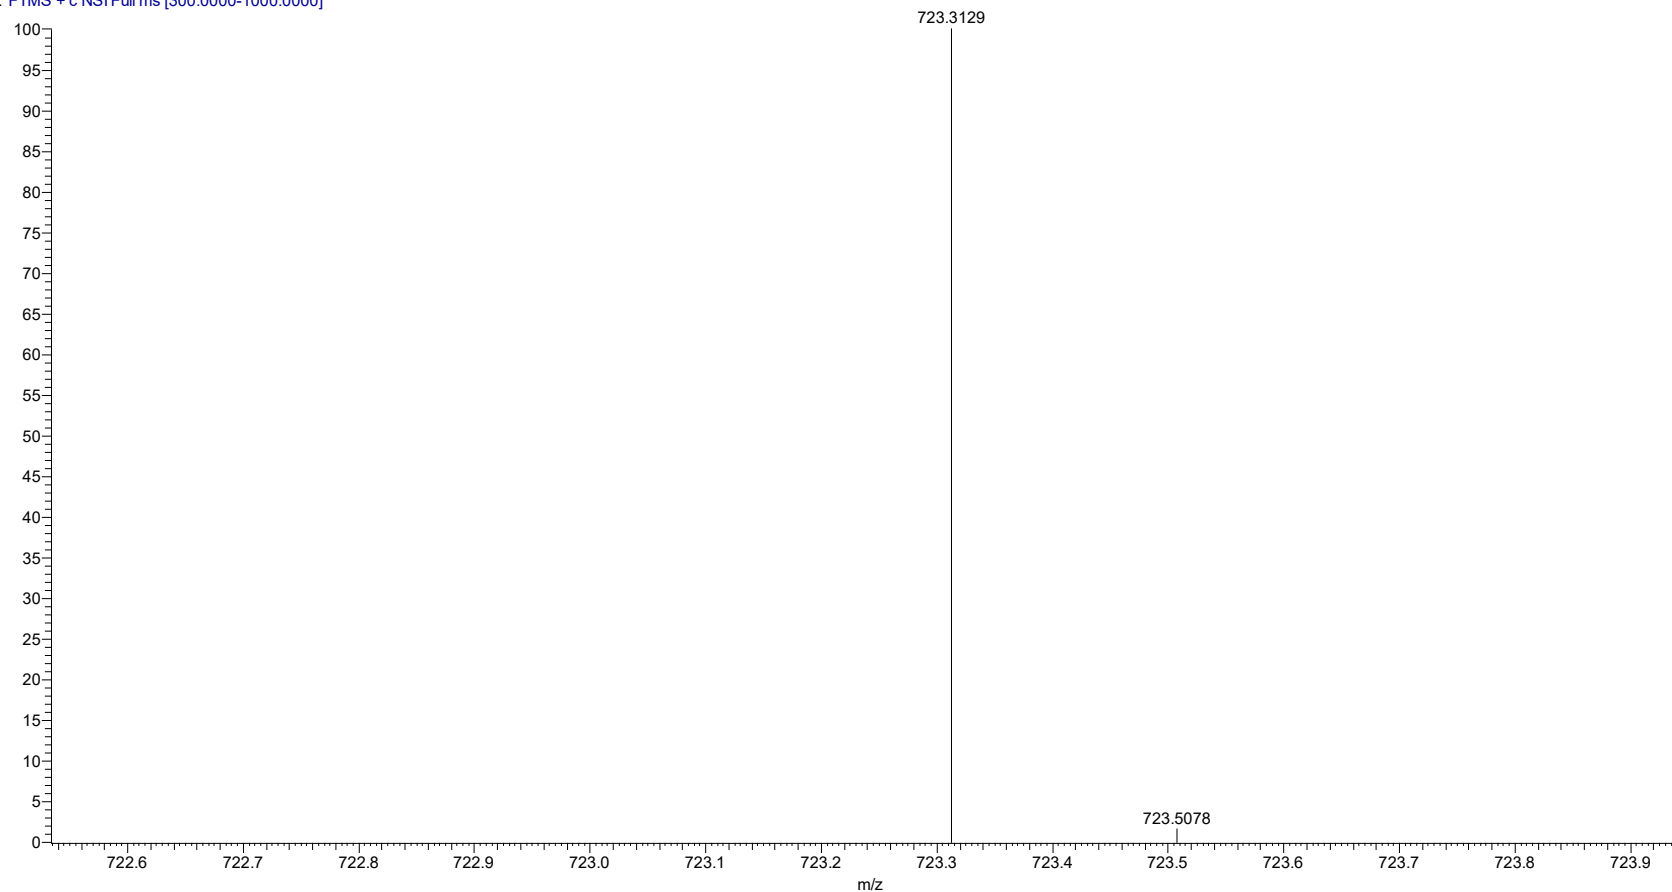

**Figure S18:** High resolution mass spectrum of **7**



```
=====
Injection Date   : 9/20/2021 2:44:39 PM
Sample Name      : SW-66-171                Location : Vial 1
Acq. Operator    :
Method           : C:\HPCHEM\1\METHODS\JNP2015.M
Last changed     : 9/20/2021 1:10:34 PM
                  (modified after loading)
=====
```

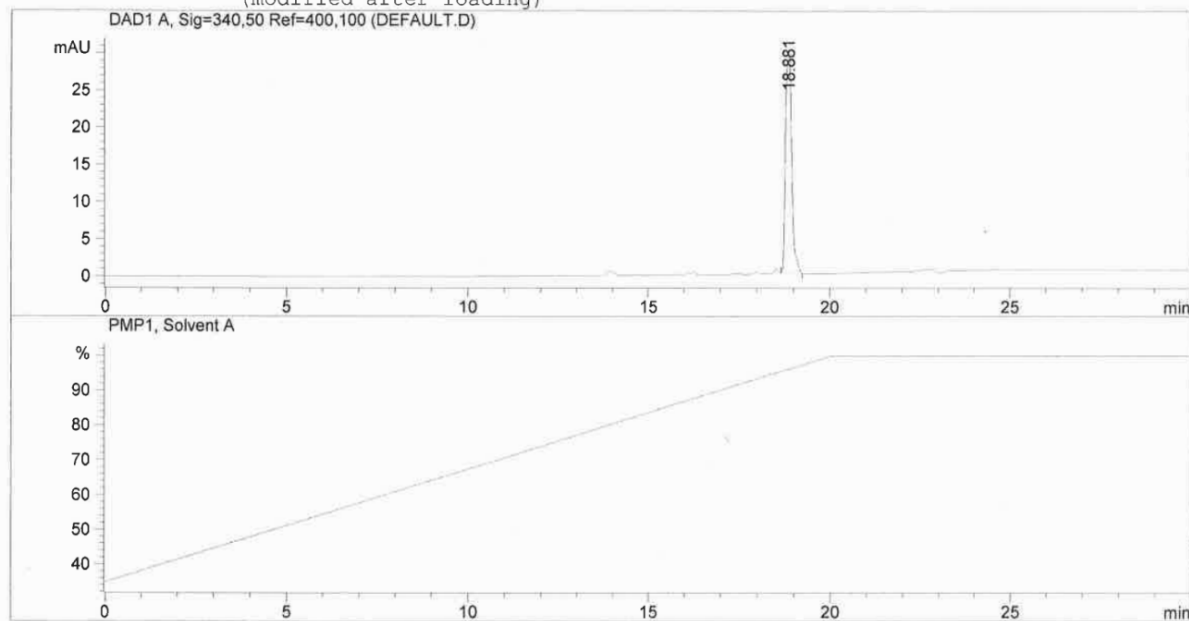

```
=====
Area Percent Report
=====
```

```
Sorted By       : Signal
Multiplier      : 1.0000
Dilution        : 1.0000
```

Signal 1: DAD1 A, Sig=340,50 Ref=400,100

| Peak # | RetTime [min] | Type | Width [min] | Area [mAU*s] | Height [mAU] | Area %   |
|--------|---------------|------|-------------|--------------|--------------|----------|
| 1      | 18.881        | VB   | 0.1887      | 352.03210    | 30.04979     | 100.0000 |

Totals : 352.03210 30.04979

Results obtained with enhanced integrator!

```
=====
*** End of Report ***
=====
```

Figure S19: HPLC chromatogram of 7

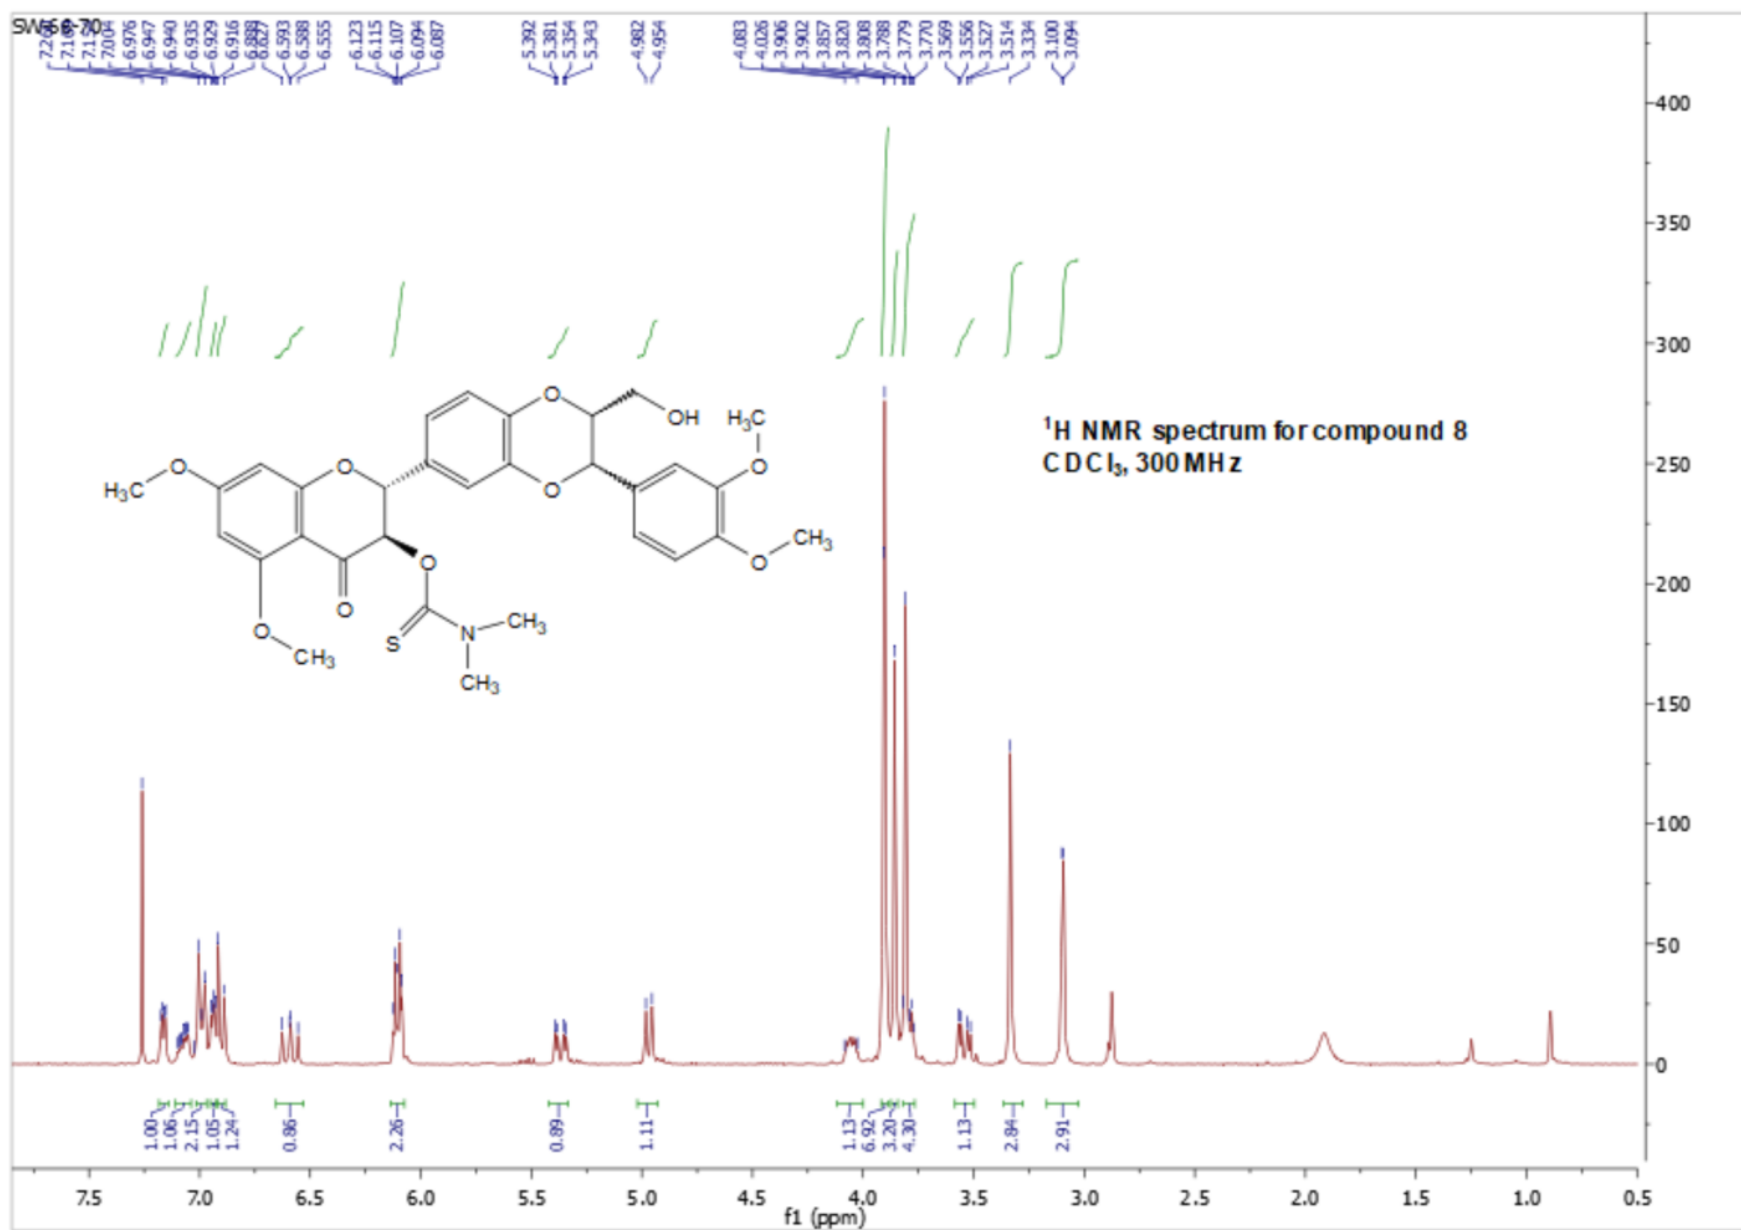

**Figure S20:** <sup>1</sup>H NMR spectrum of **8** in CDCl<sub>3</sub>

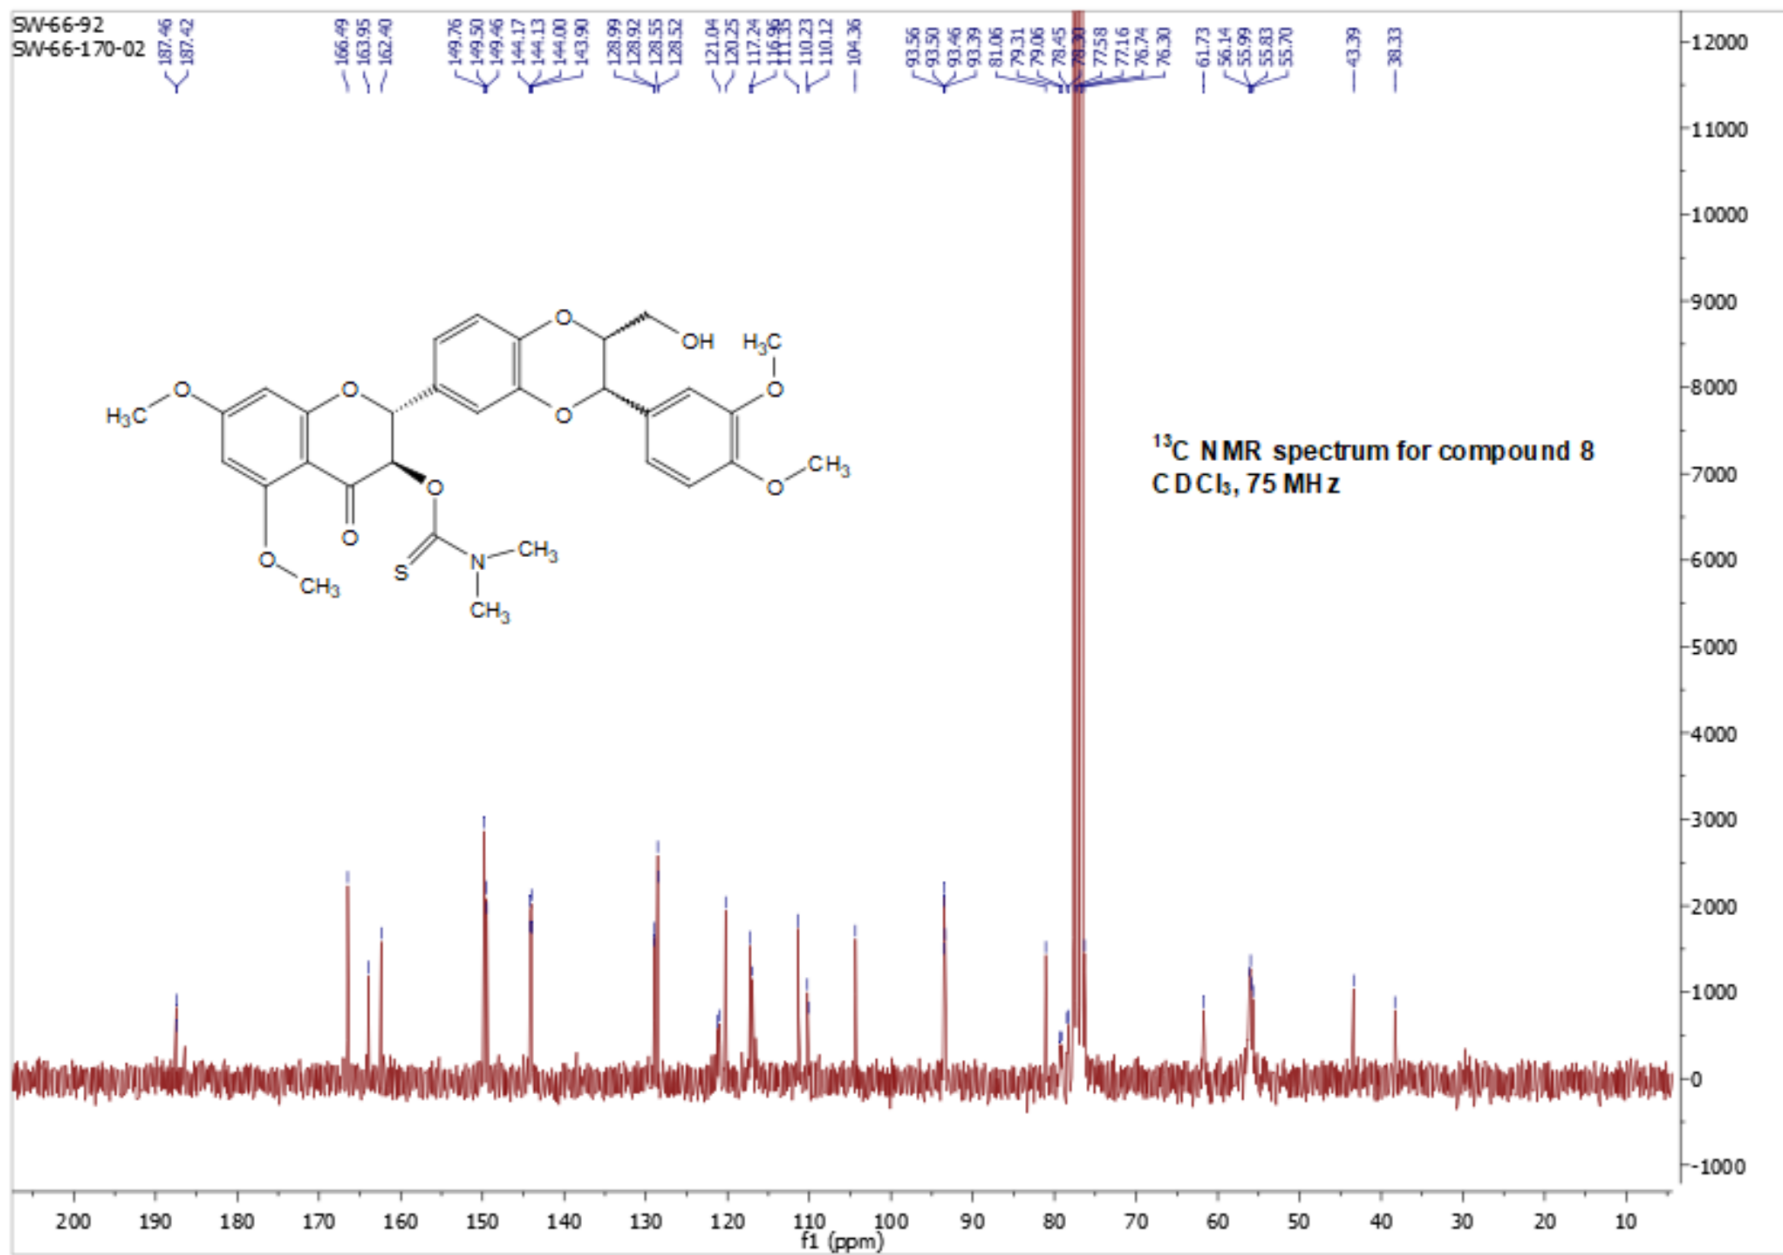

Figure S21: <sup>13</sup>C NMR spectrum of **8** in CDCl<sub>3</sub>

| compds   | Mol. Formula | Exact Mass | M+H      | Observed        | delta  | ppm  |
|----------|--------------|------------|----------|-----------------|--------|------|
| SW-66-70 | C31H33NO10S  | 611.1826   | 612.1904 | <b>612.1920</b> | 0.0016 | 2.68 |

SW-66-70 #4861-4923 RT: 26.28-26.61 AV: 63 NL: 3.26E8  
T: FTMS + c NSI Full ms [150.0000-1000.0000]

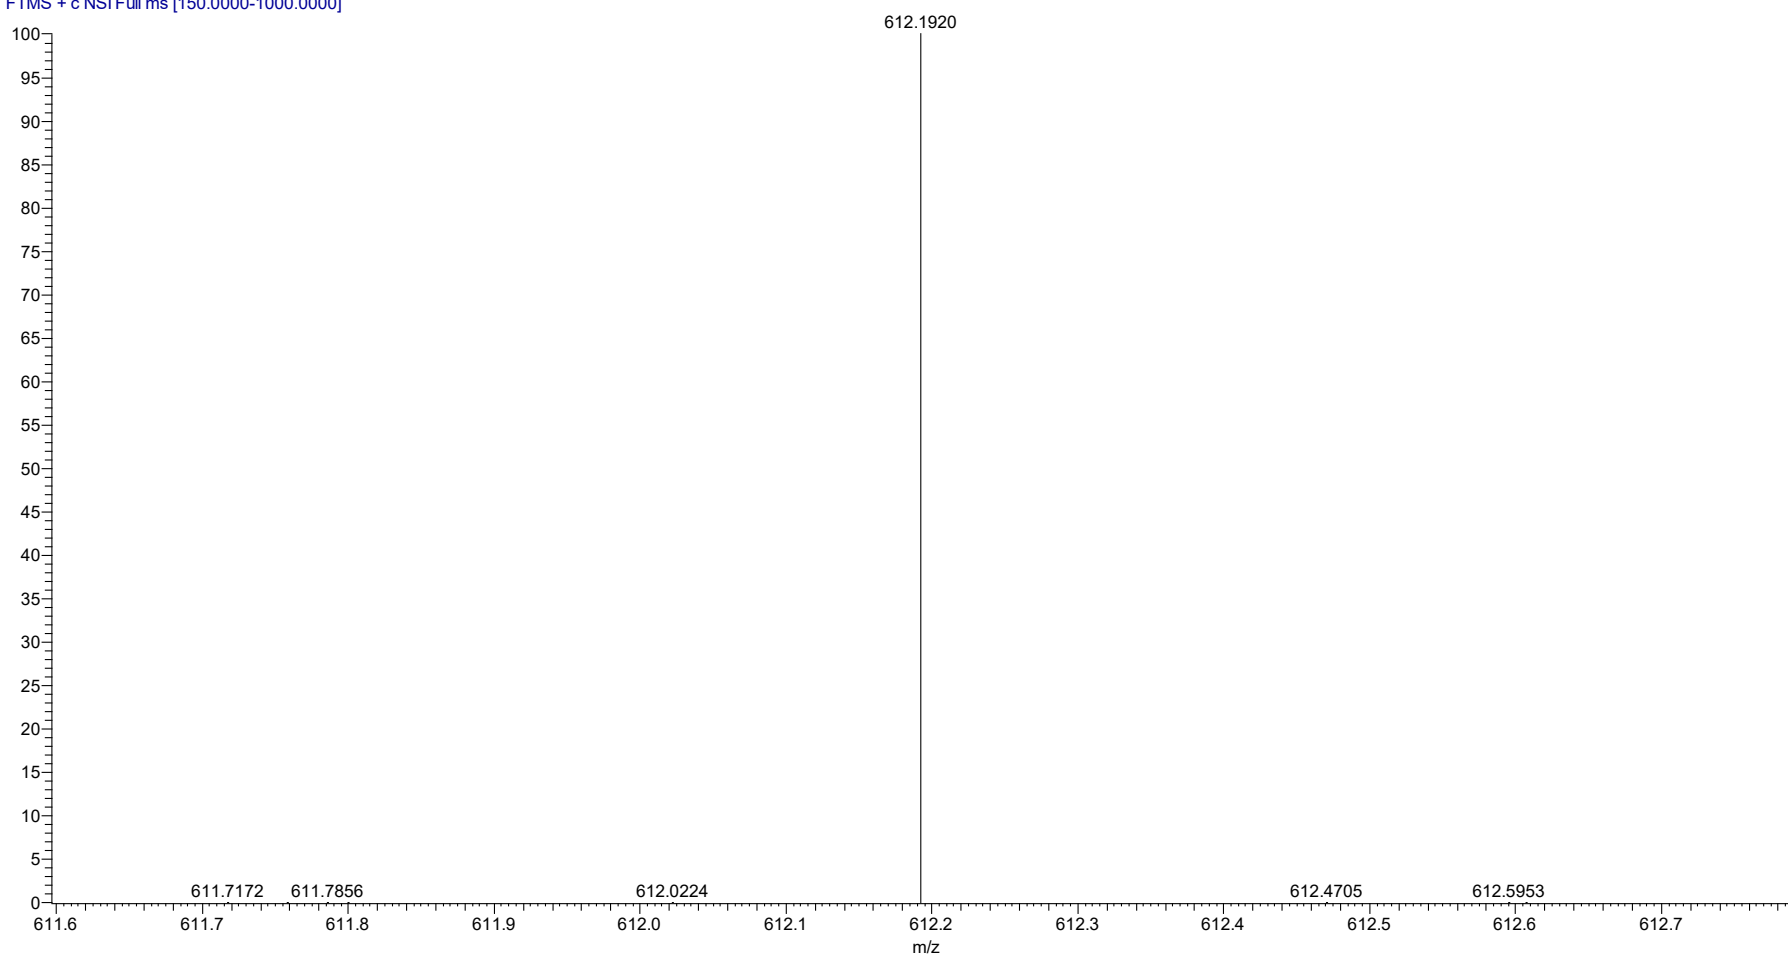

**Figure S22:** High resolution mass spectrum of **8**

```
=====
Injection Date   : 9/17/2021 10:18:16 AM
Sample Name      : SW-66-70                      Location : Vial 1
Acq. Operator    :
Method           : C:\HPCHEM\1\METHODS\JNP2015.M
Last changed     : 9/17/2021 10:10:55 AM
                  (modified after loading)
=====
```

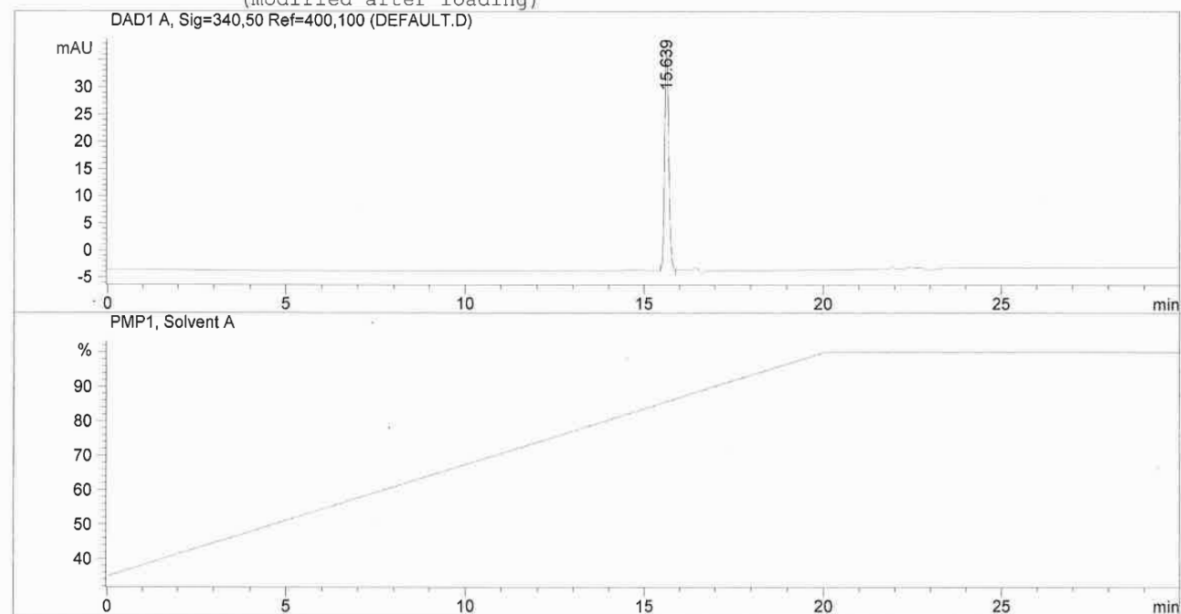

```
=====
                          Area Percent Report
=====
```

```
Sorted By      :      Signal
Multiplier     :      1.0000
Dilution       :      1.0000
```

Signal 1: DAD1 A, Sig=340,50 Ref=400,100

| Peak # | RetTime [min] | Type | Width [min] | Area [mAU*s] | Height [mAU] | Area %   |
|--------|---------------|------|-------------|--------------|--------------|----------|
| 1      | 15.639        | BB   | 0.1241      | 326.80460    | 40.52058     | 100.0000 |

Totals : 326.80460 40.52058

Results obtained with enhanced integrator!

```
=====
*** End of Report ***
=====
```

Figure S23: HPLC chromatogram of 8

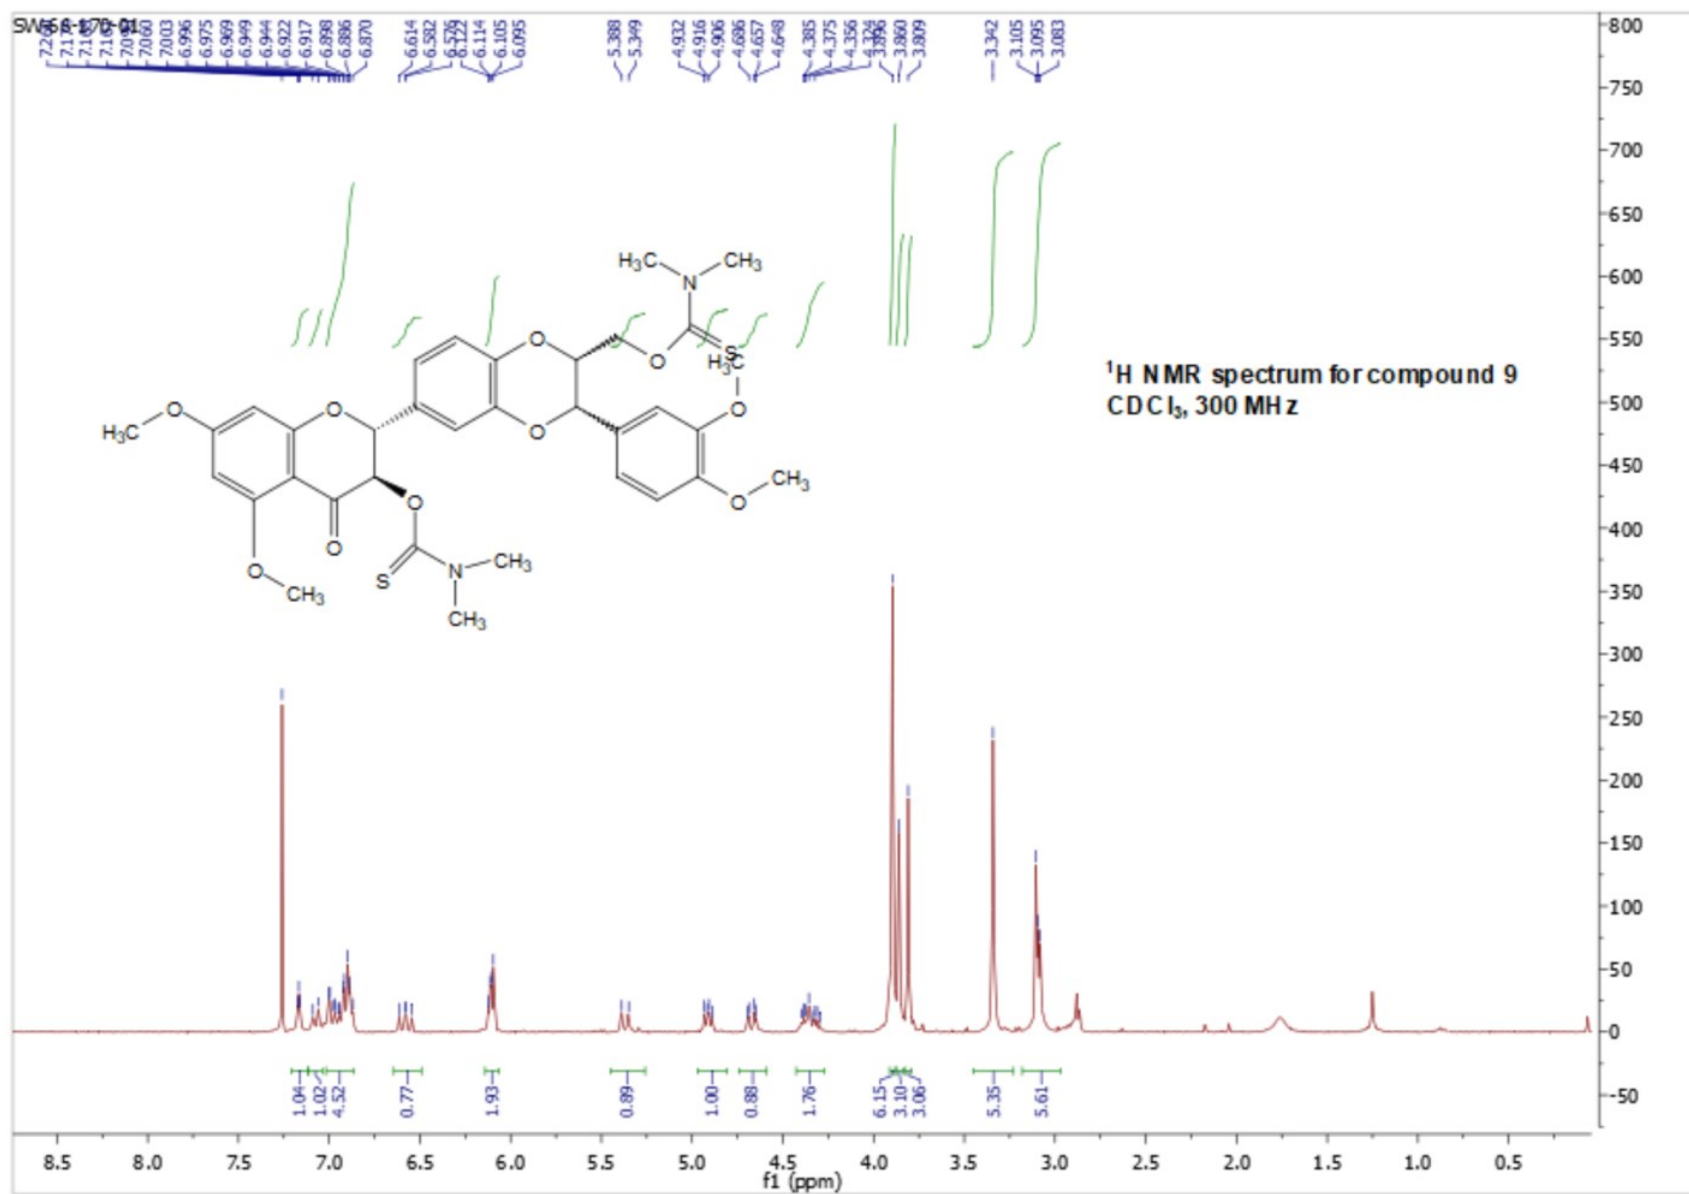

Figure S24: <sup>1</sup>H NMR spectrum of **9** in CDCl<sub>3</sub>

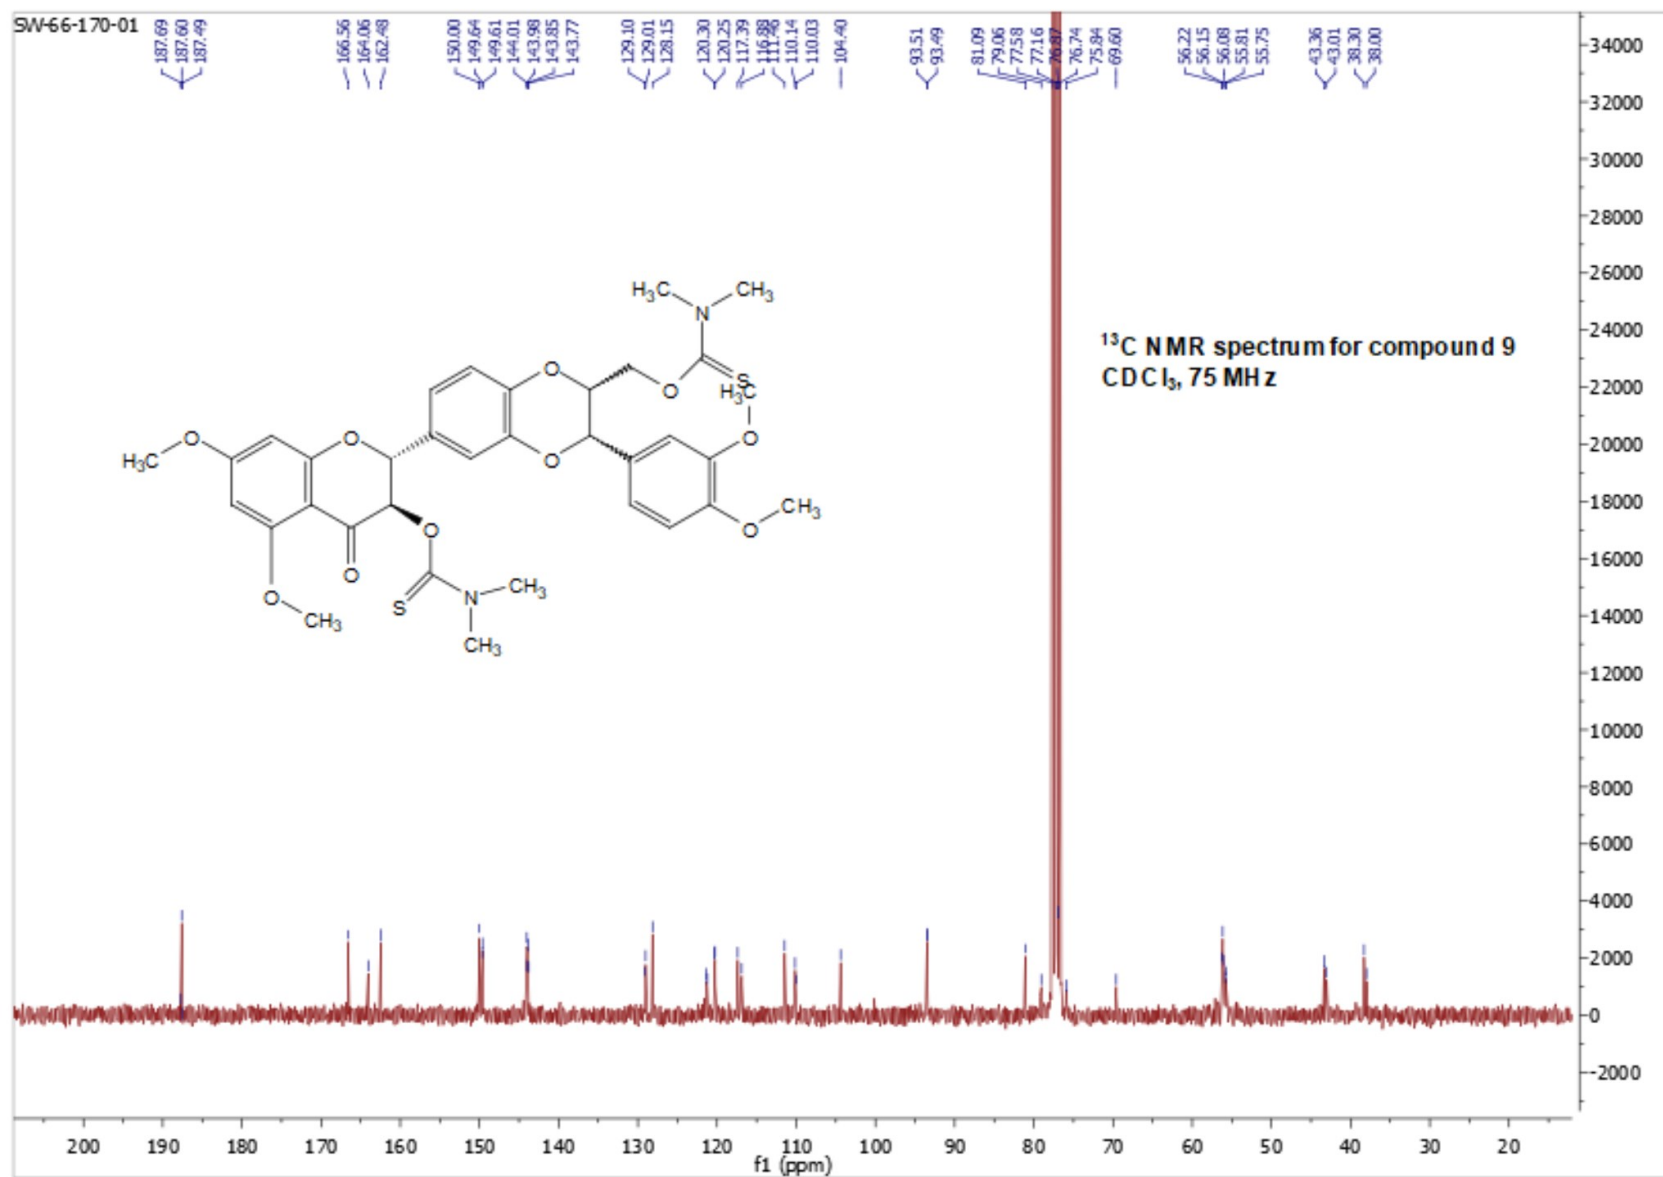

Figure S25: <sup>13</sup>C NMR spectrum of **9** in CDCl<sub>3</sub>

| Sample Name  | Mol Fomula    | MW       | M+H      | observed | delta  | ppm  |
|--------------|---------------|----------|----------|----------|--------|------|
| SW-66-170-01 | C34H38N2O10S2 | 698.1968 | 699.2046 | 699.2050 | 0.0004 | 0.51 |

SW-66-170-01 #2436-2464 RT: 13.17-13.32 AV: 29 NL: 2.05E8  
T: FTMS + c NSI Full ms [300.0000-1000.0000]

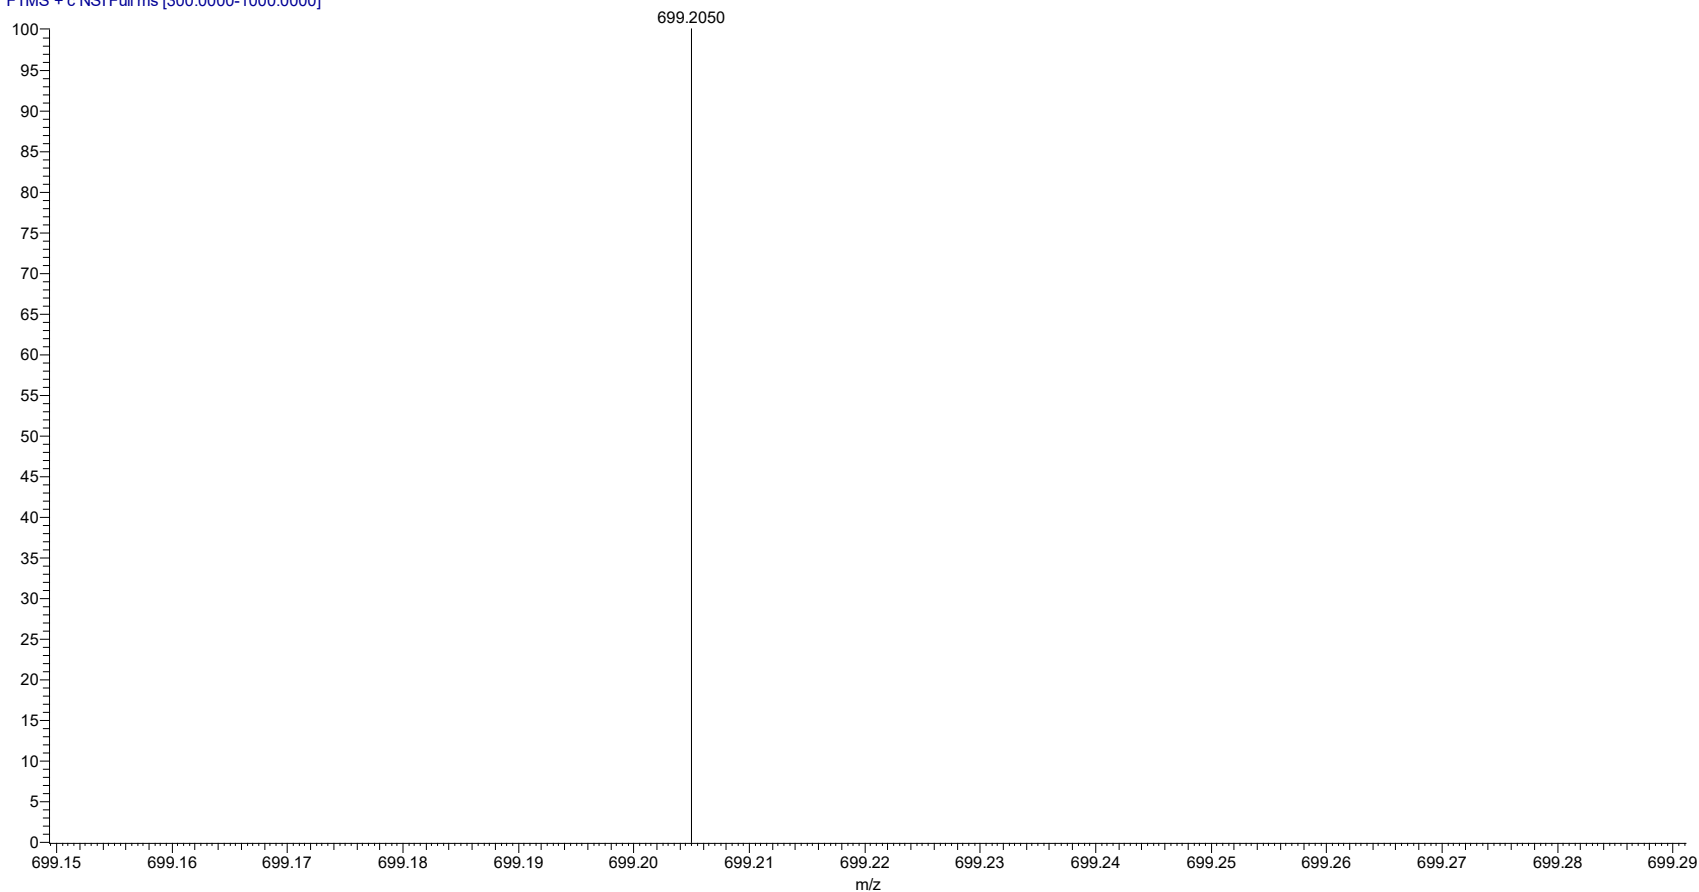

**Figure S26:** High resolution mass spectrum of **9**



```
=====
Injection Date   : 9/18/2021 11:40:15 AM
Sample Name      : SW-66-170                Location : Vial 1
Acq. Operator    :
Method           : C:\HPCHEM\1\METHODS\JNP2015.M
Last changed     : 9/18/2021 9:26:55 AM
                  (modified after loading)
=====
```

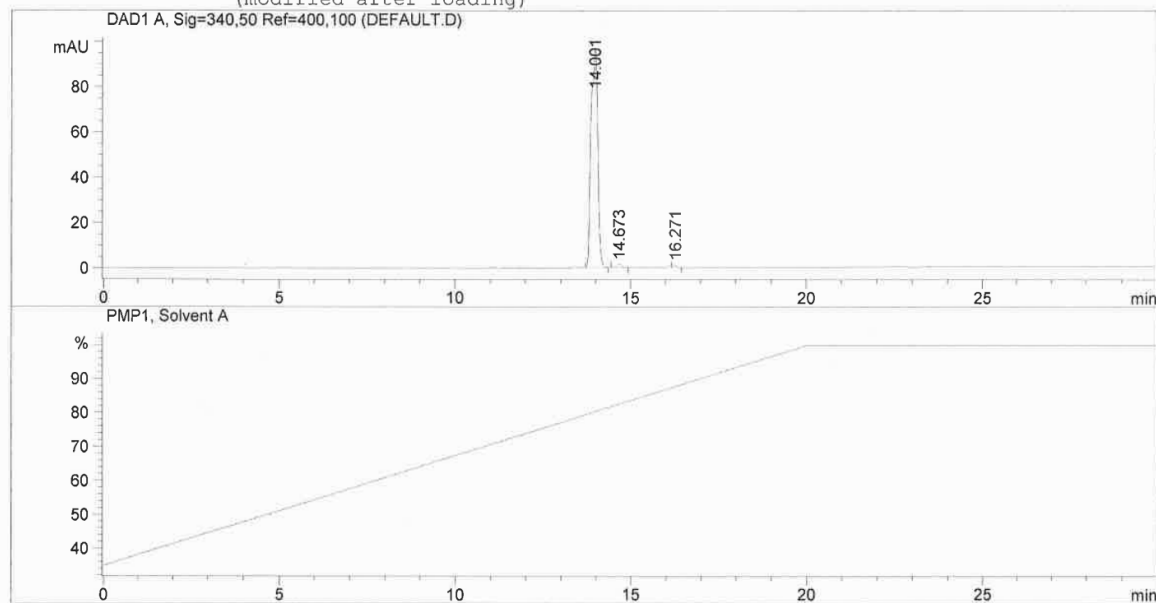

```
=====
Area Percent Report
=====
```

```
Sorted By      : Signal
Multiplier     : 1.0000
Dilution       : 1.0000
```

Signal 1: DAD1 A, Sig=340,50 Ref=400,100

| Peak # | RetTime [min] | Type | Width [min] | Area [mAU*s] | Height [mAU] | Area %  |
|--------|---------------|------|-------------|--------------|--------------|---------|
| 1      | 14.001        | BB   | 0.1829      | 1281.49658   | 96.52377     | 97.8661 |
| 2      | 14.673        | BP   | 0.1679      | 19.23740     | 1.67563      | 1.4691  |
| 3      | 16.271        | VP   | 0.1173      | 8.70405      | 1.13770      | 0.6647  |

Totals : 1309.43803 99.33710

Results obtained with enhanced integrator!

```
=====
*** End of Report ***
=====
```

Figure S27: HPLC chromatogram of 9

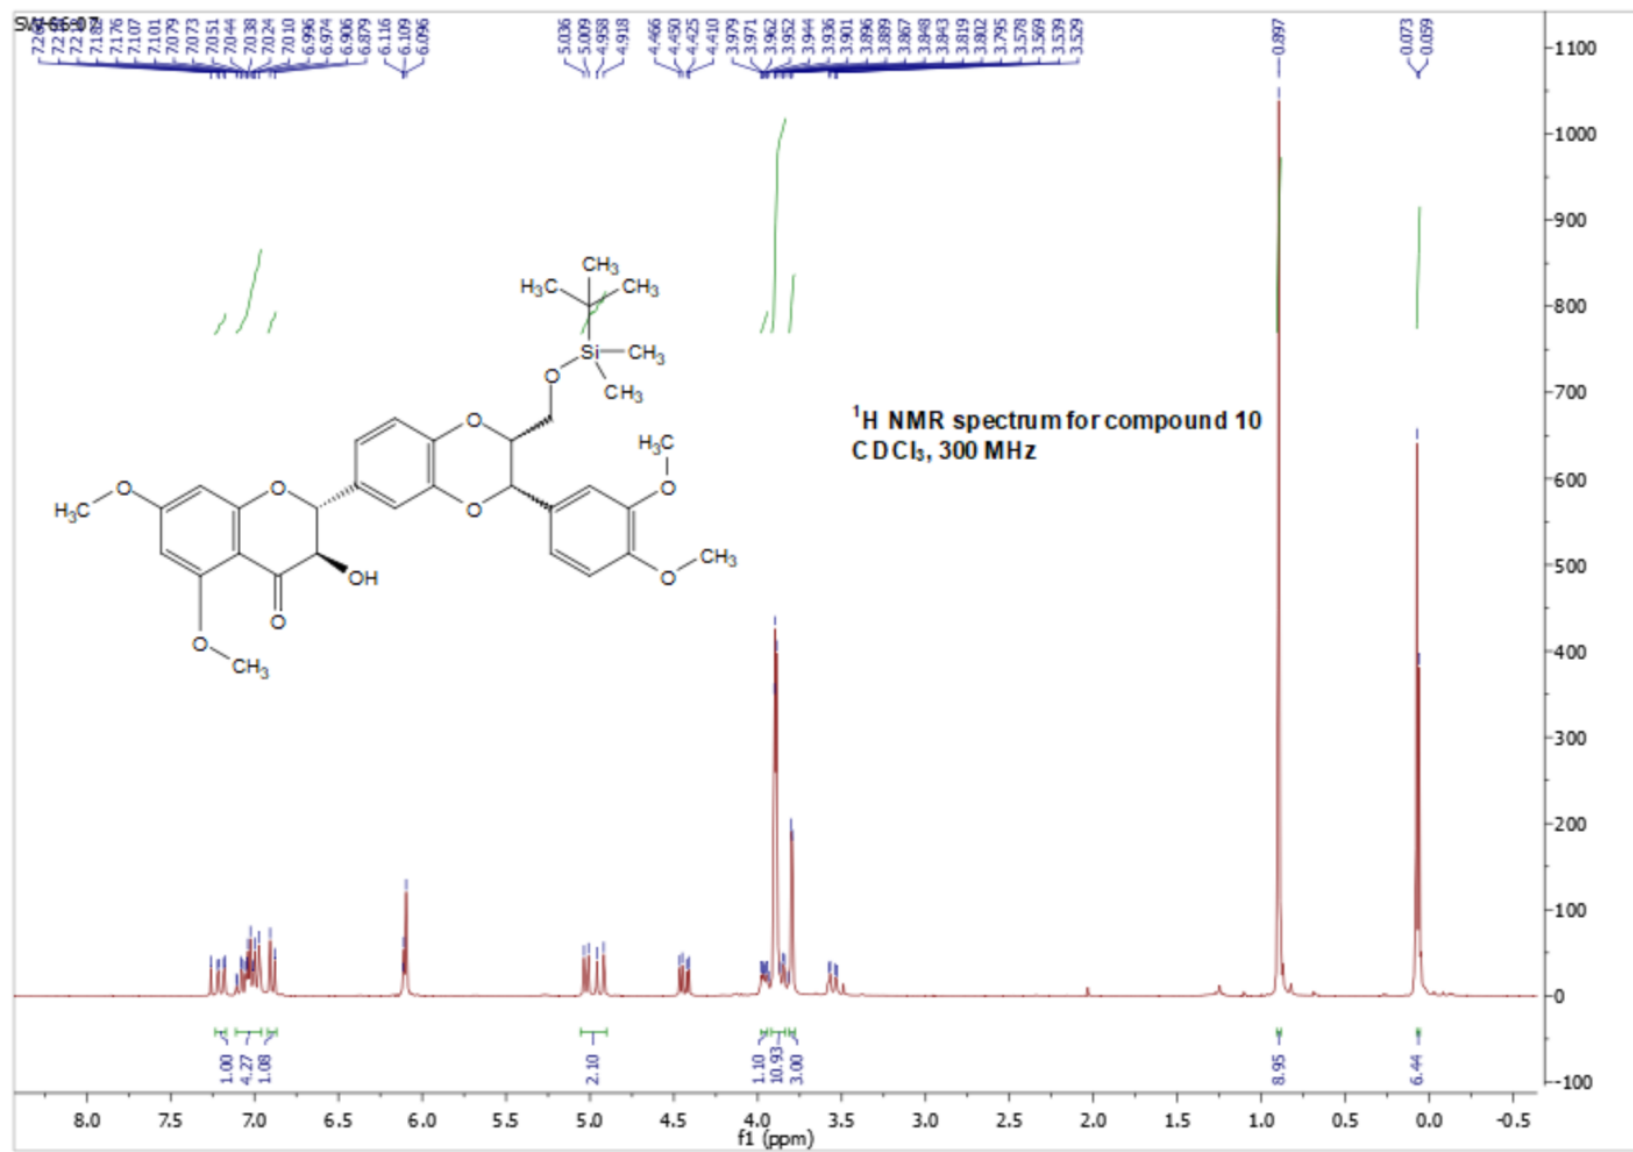

**Figure S28:** <sup>1</sup>H NMR spectrum of **10** in CDCl<sub>3</sub>

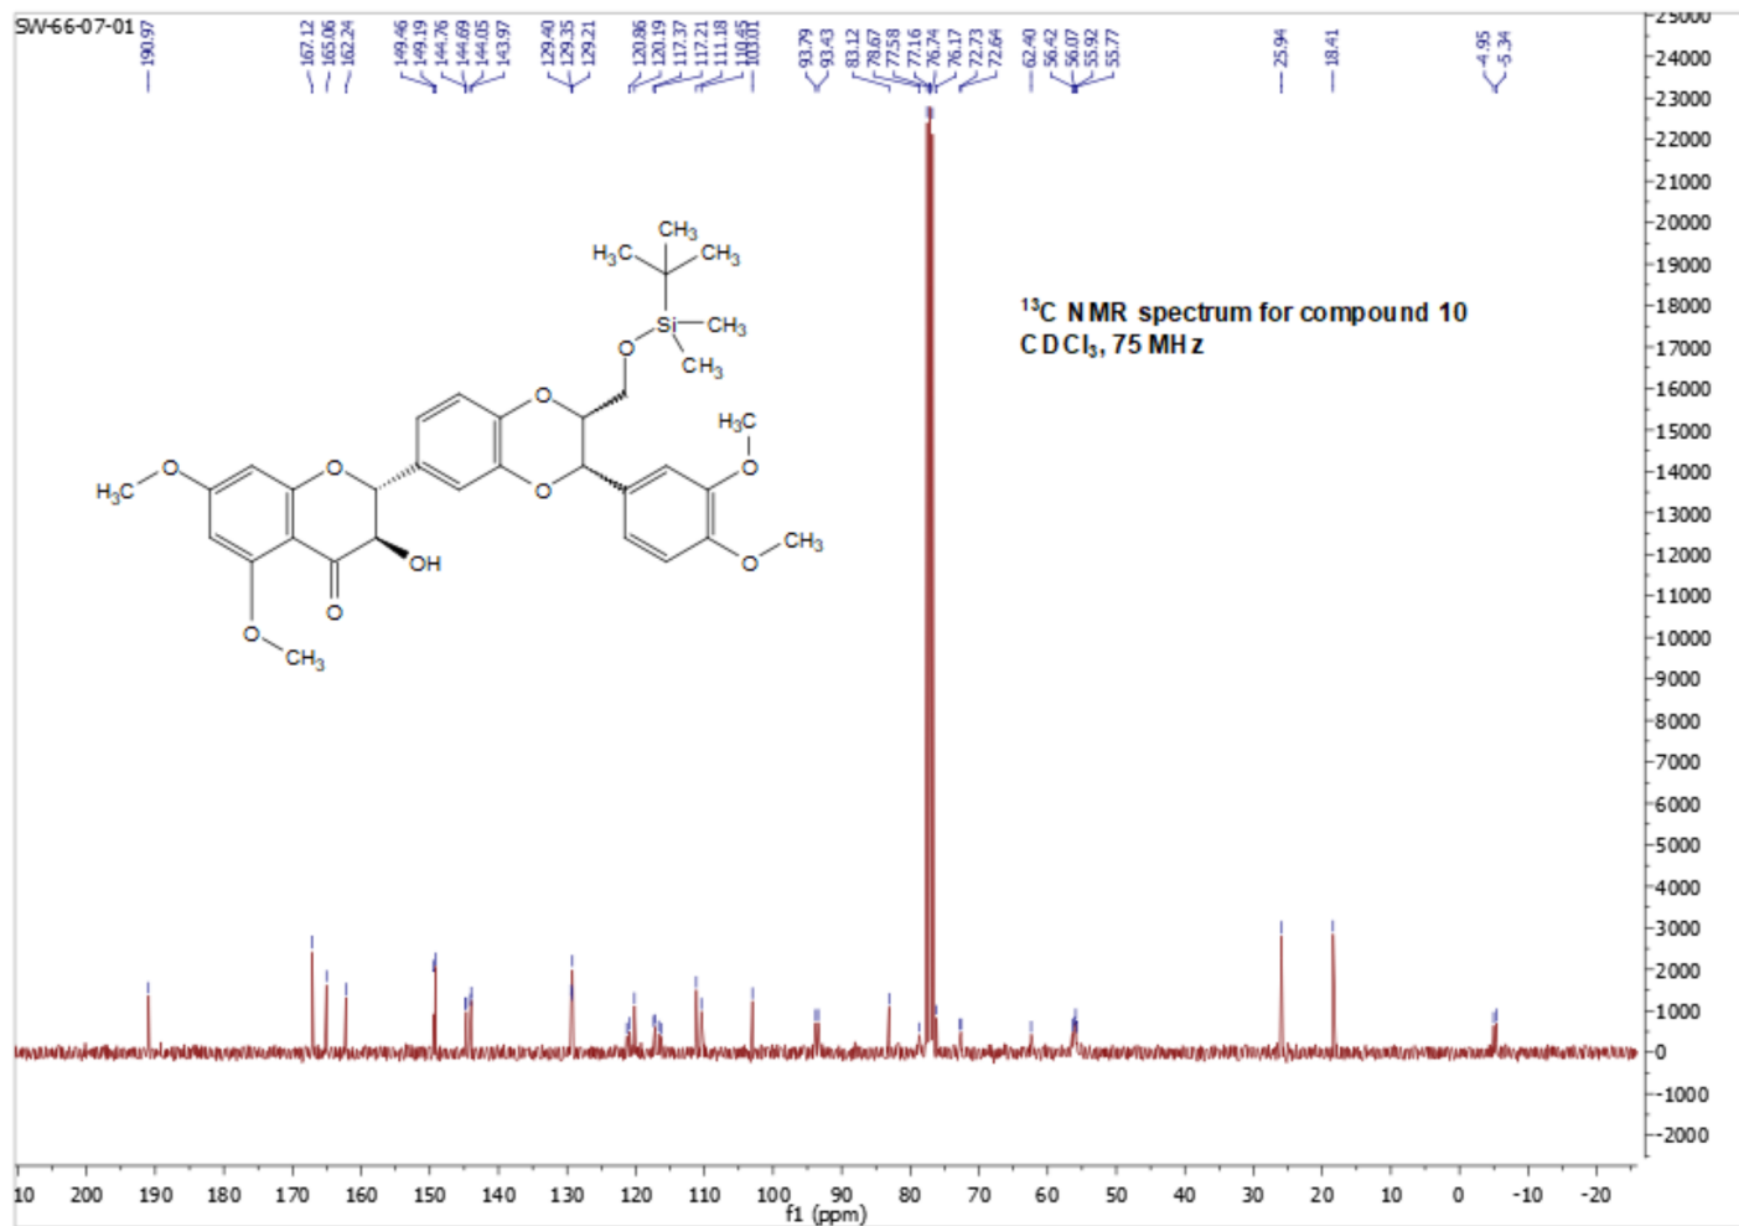

Figure S29:  $^{13}\text{C}$  NMR spectrum of **10** in  $\text{CDCl}_3$

| compds   | Mol. Formula                                       | Exact<br>Mass | M+H      | Observed        | delta          | ppm          |
|----------|----------------------------------------------------|---------------|----------|-----------------|----------------|--------------|
| SW-66-07 | C <sub>24</sub> H <sub>42</sub> O <sub>10</sub> Si | 638.2548      | 639.2626 | <b>639.2623</b> | <b>-0.0003</b> | <b>-0.44</b> |

SW-66-07 #3249-3816 RT: 17.93-20.88 AV: 568 NL: 9.92E6  
T: FTMS + c NSI Full ms [150.0000-1000.0000]

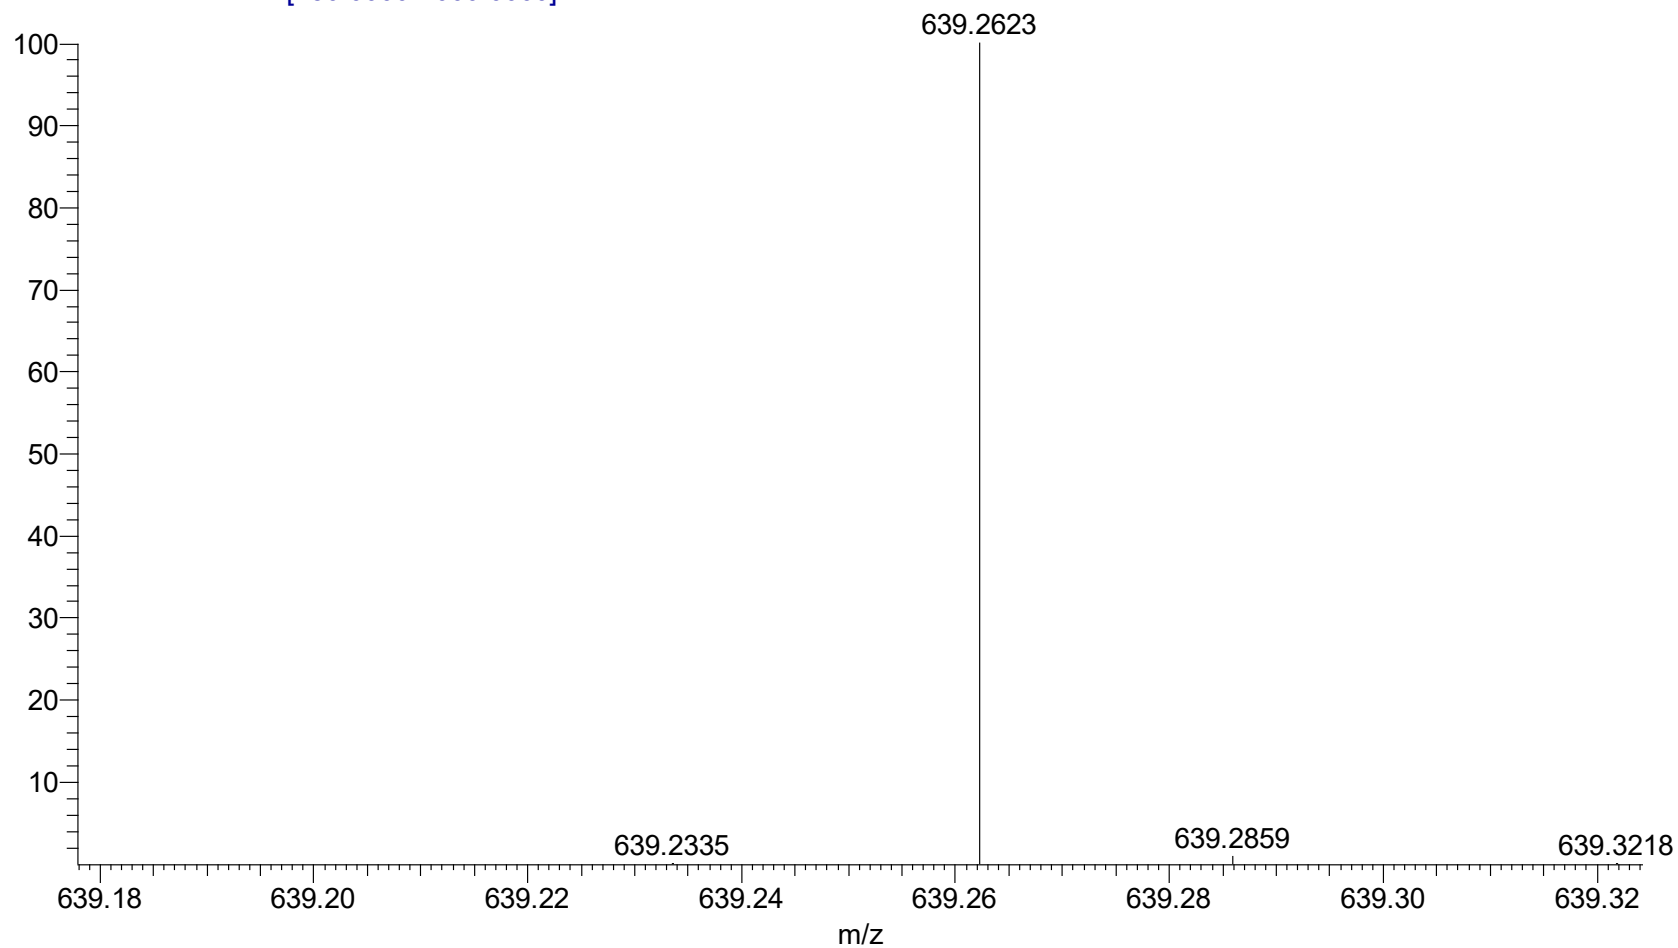

**Figure S30:** High resolution mass spectrum of **10**

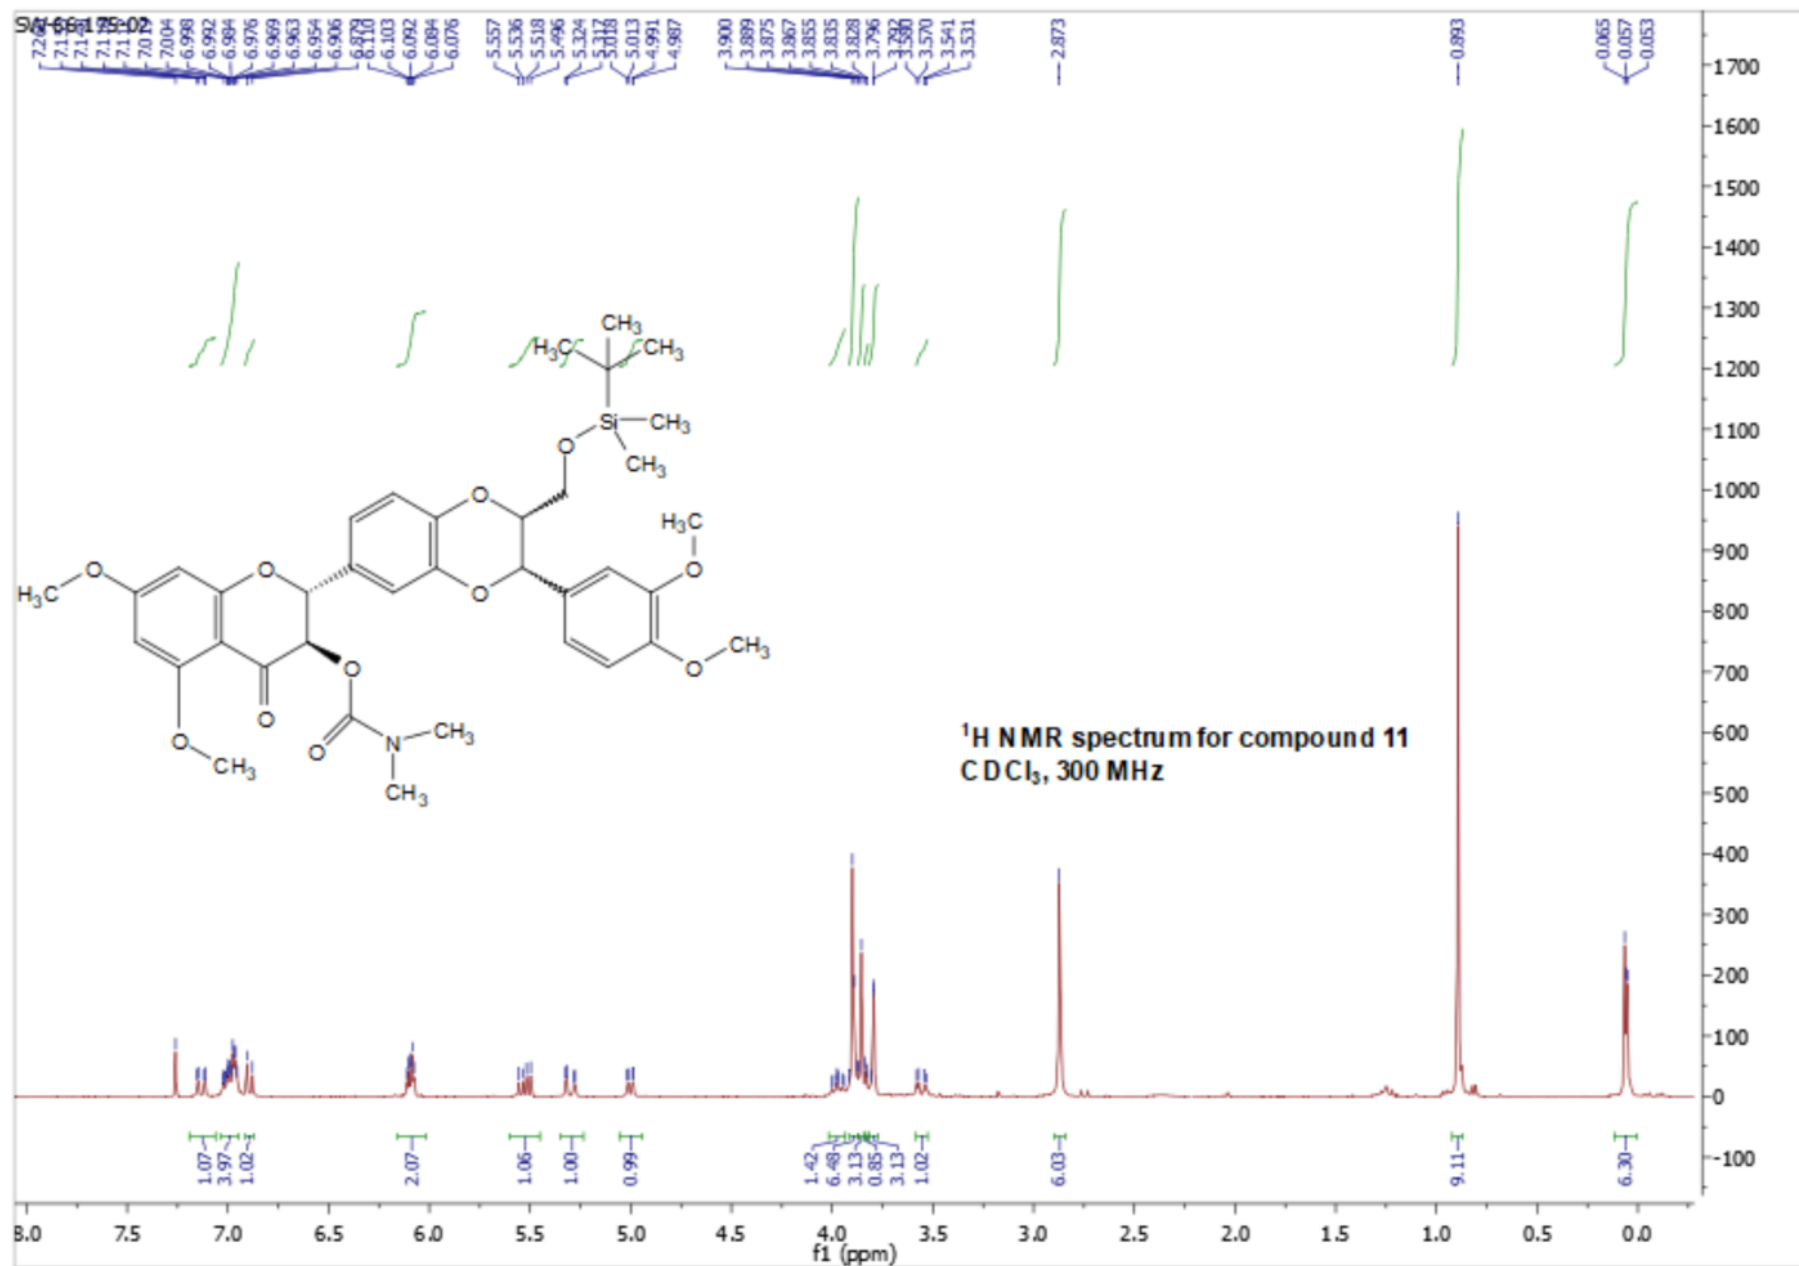

Figure S31: <sup>1</sup>H NMR spectrum of **11** in CDCl<sub>3</sub>

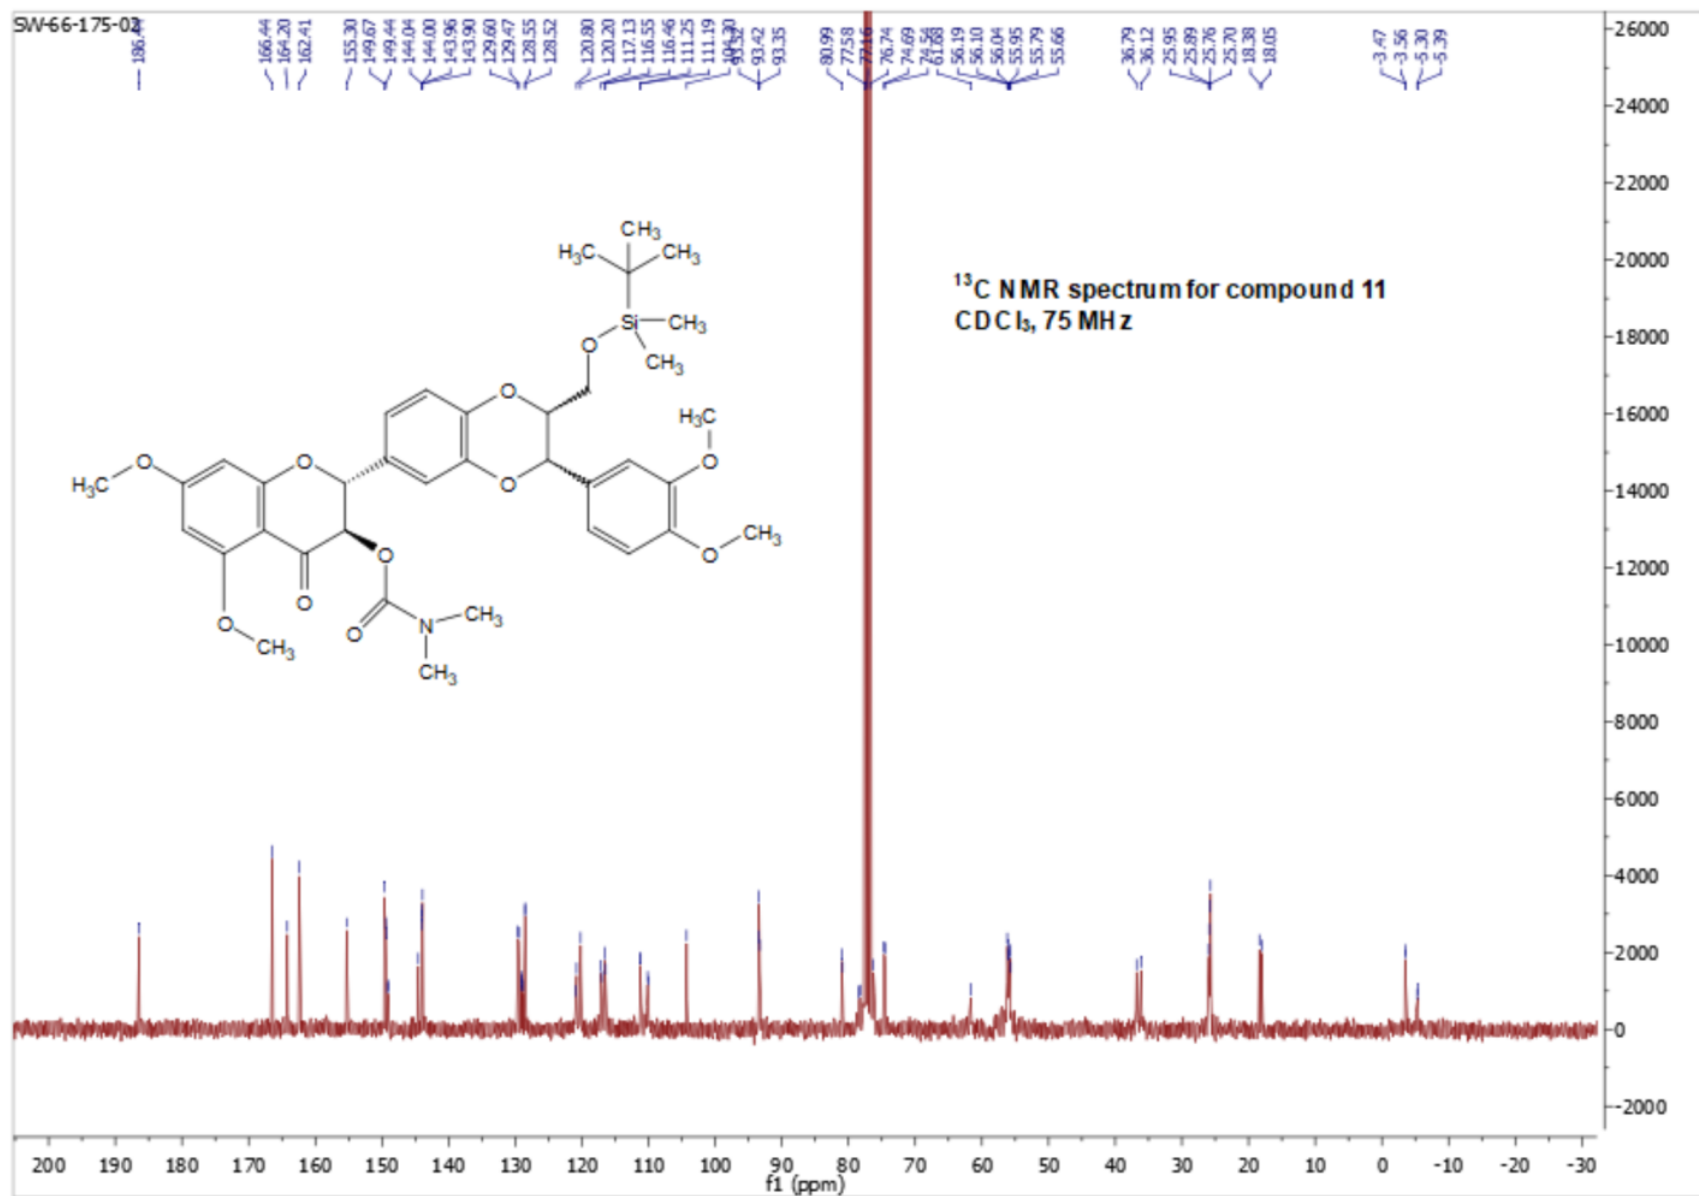

Figure S32: <sup>13</sup>C NMR spectrum of **11** in CDCl<sub>3</sub>

| Sample Name  | Mol Fomula                                          | MW       | M+H      | observed | delta  | ppm  |
|--------------|-----------------------------------------------------|----------|----------|----------|--------|------|
| SW-66-175-02 | C <sub>37</sub> H <sub>47</sub> NO <sub>11</sub> Si | 709.2919 | 710.2997 | 710.3006 | 0.0009 | 1.27 |

SW-66-175-02 #3050-3236 RT: 16.38-17.39 AV: 187 NL: 1.96E7  
T: FTMS + c NSI Full ms [300.0000-1000.0000]

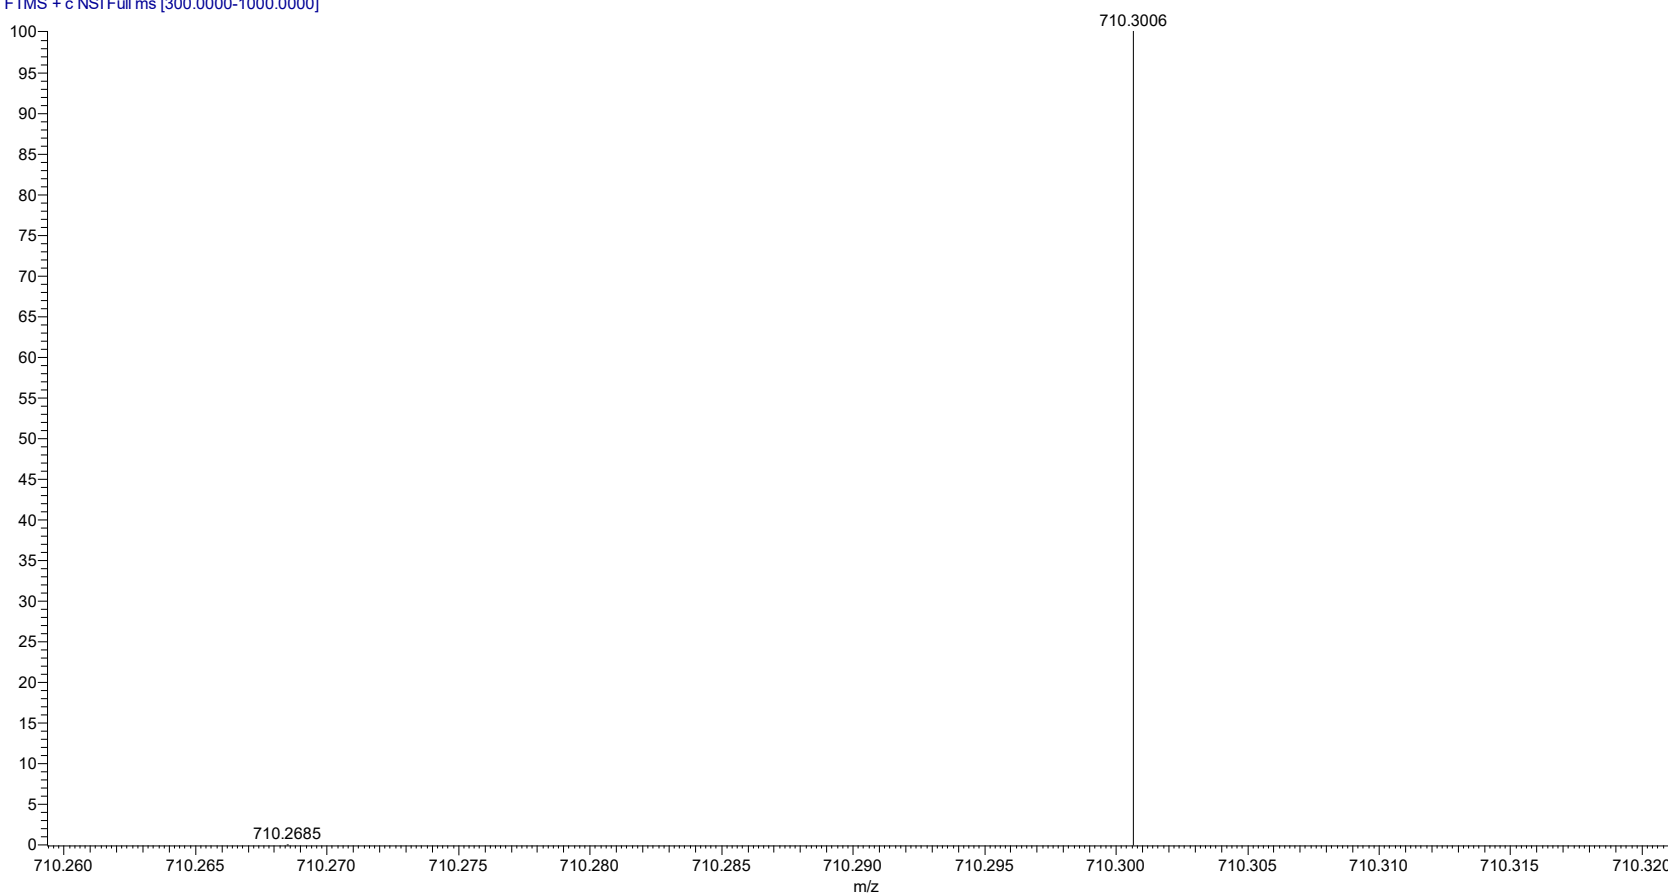

**Figure S33:** High resolution mass spectrum of **11**

```
=====
Injection Date   : 9/17/2021 11:10:47 AM
Sample Name      : SW-66-175-02             Location : Vial 1
Acq. Operator    :
Method           : C:\HPCHEM\1\METHODS\JNP2015.M
Last changed     : 9/17/2021 10:10:55 AM
                  (modified after loading)
=====
```

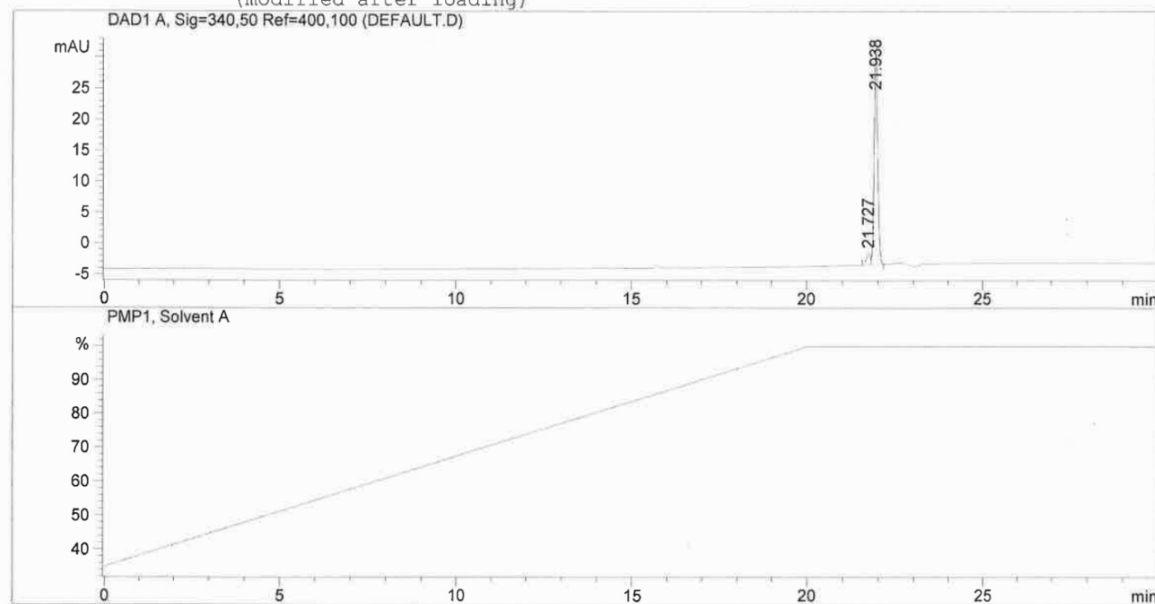

```
=====
Area Percent Report
=====
```

```
Sorted By      : Signal
Multiplier     : 1.0000
Dilution       : 1.0000
```

Signal 1: DAD1 A, Sig=340,50 Ref=400,100

| Peak # | RetTime [min] | Type | Width [min] | Area [mAU*s] | Height [mAU] | Area %  |
|--------|---------------|------|-------------|--------------|--------------|---------|
| 1      | 21.727        | BV   | 0.1121      | 14.86666     | 1.96797      | 5.8414  |
| 2      | 21.938        | VB   | 0.1067      | 239.63838    | 34.64161     | 94.1586 |

Totals : 254.50505 36.60958

Results obtained with enhanced integrator!

```
=====
*** End of Report ***
=====
```

Figure S33: HPLC chromatogram of 11



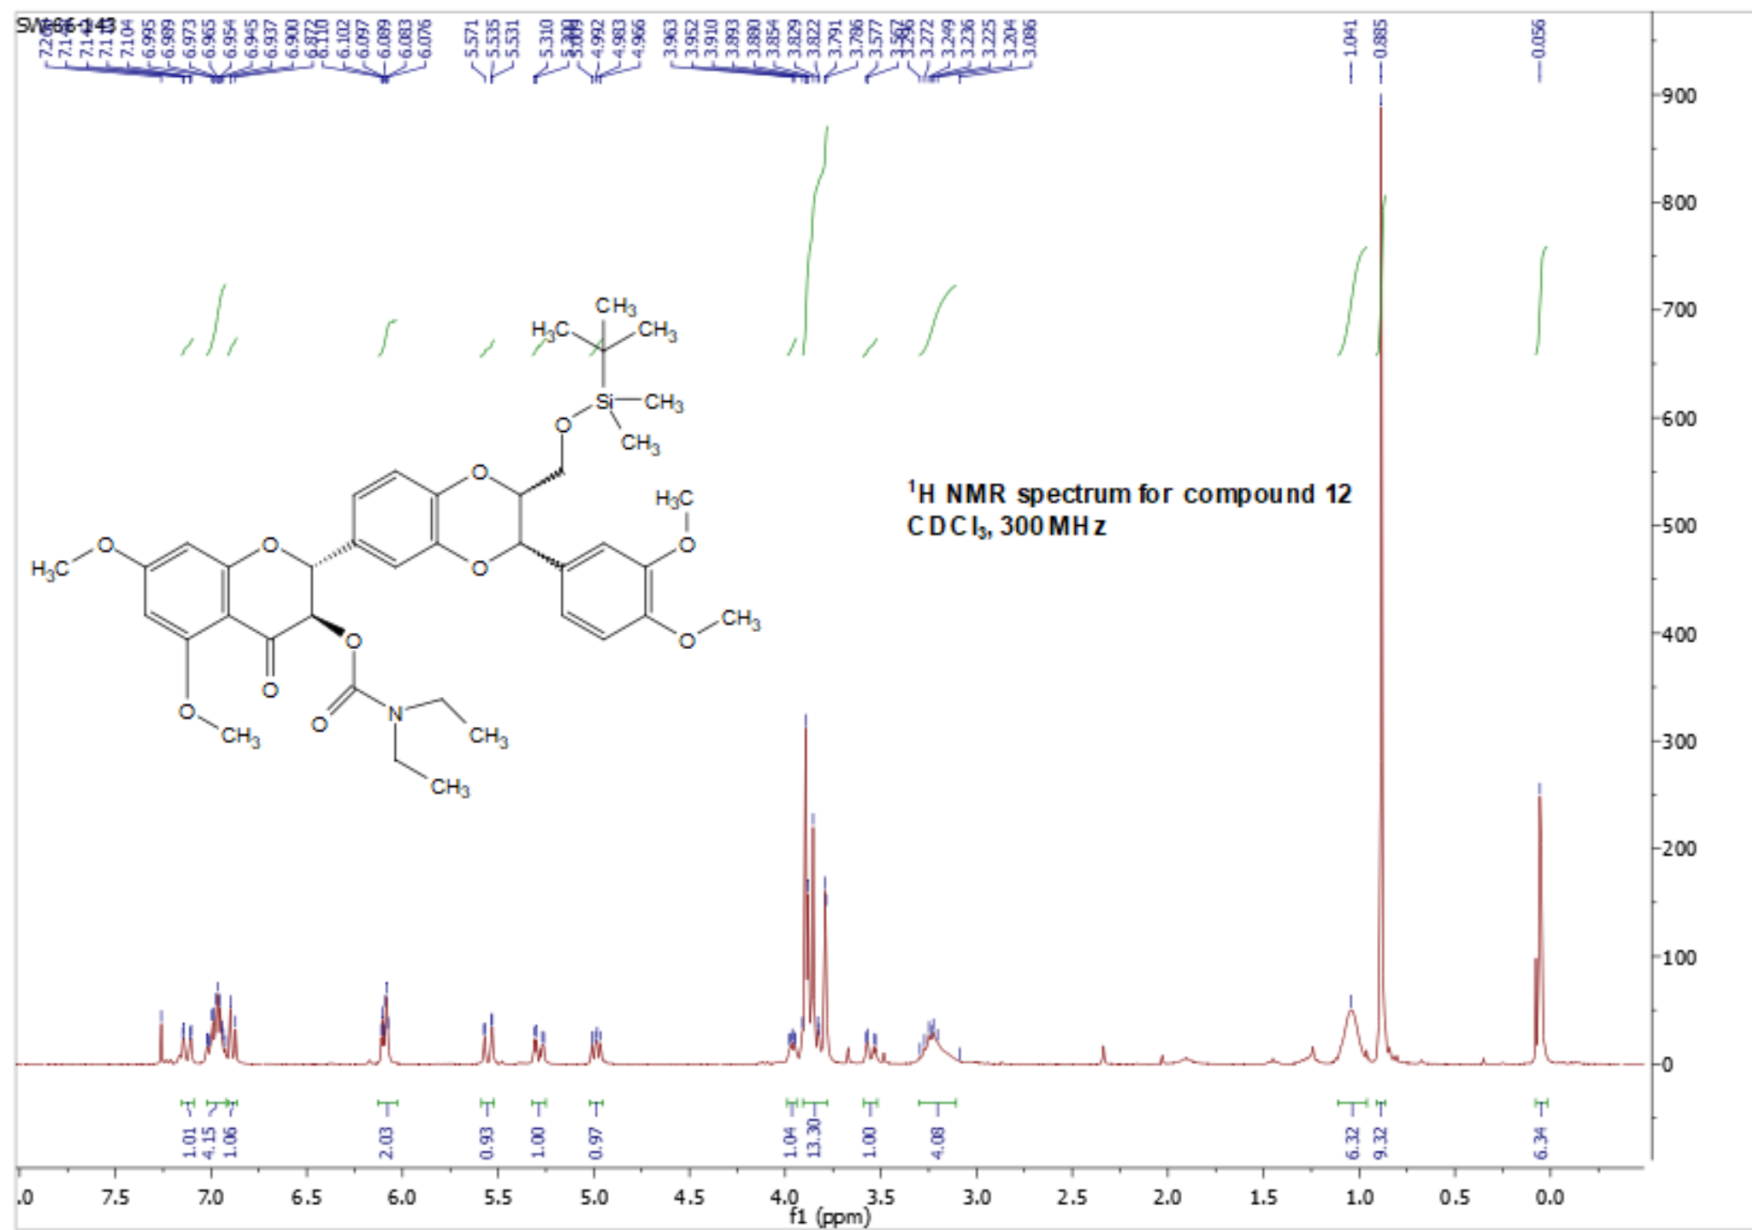

Figure S34: <sup>1</sup>H NMR spectrum of **12** in CDCl<sub>3</sub>

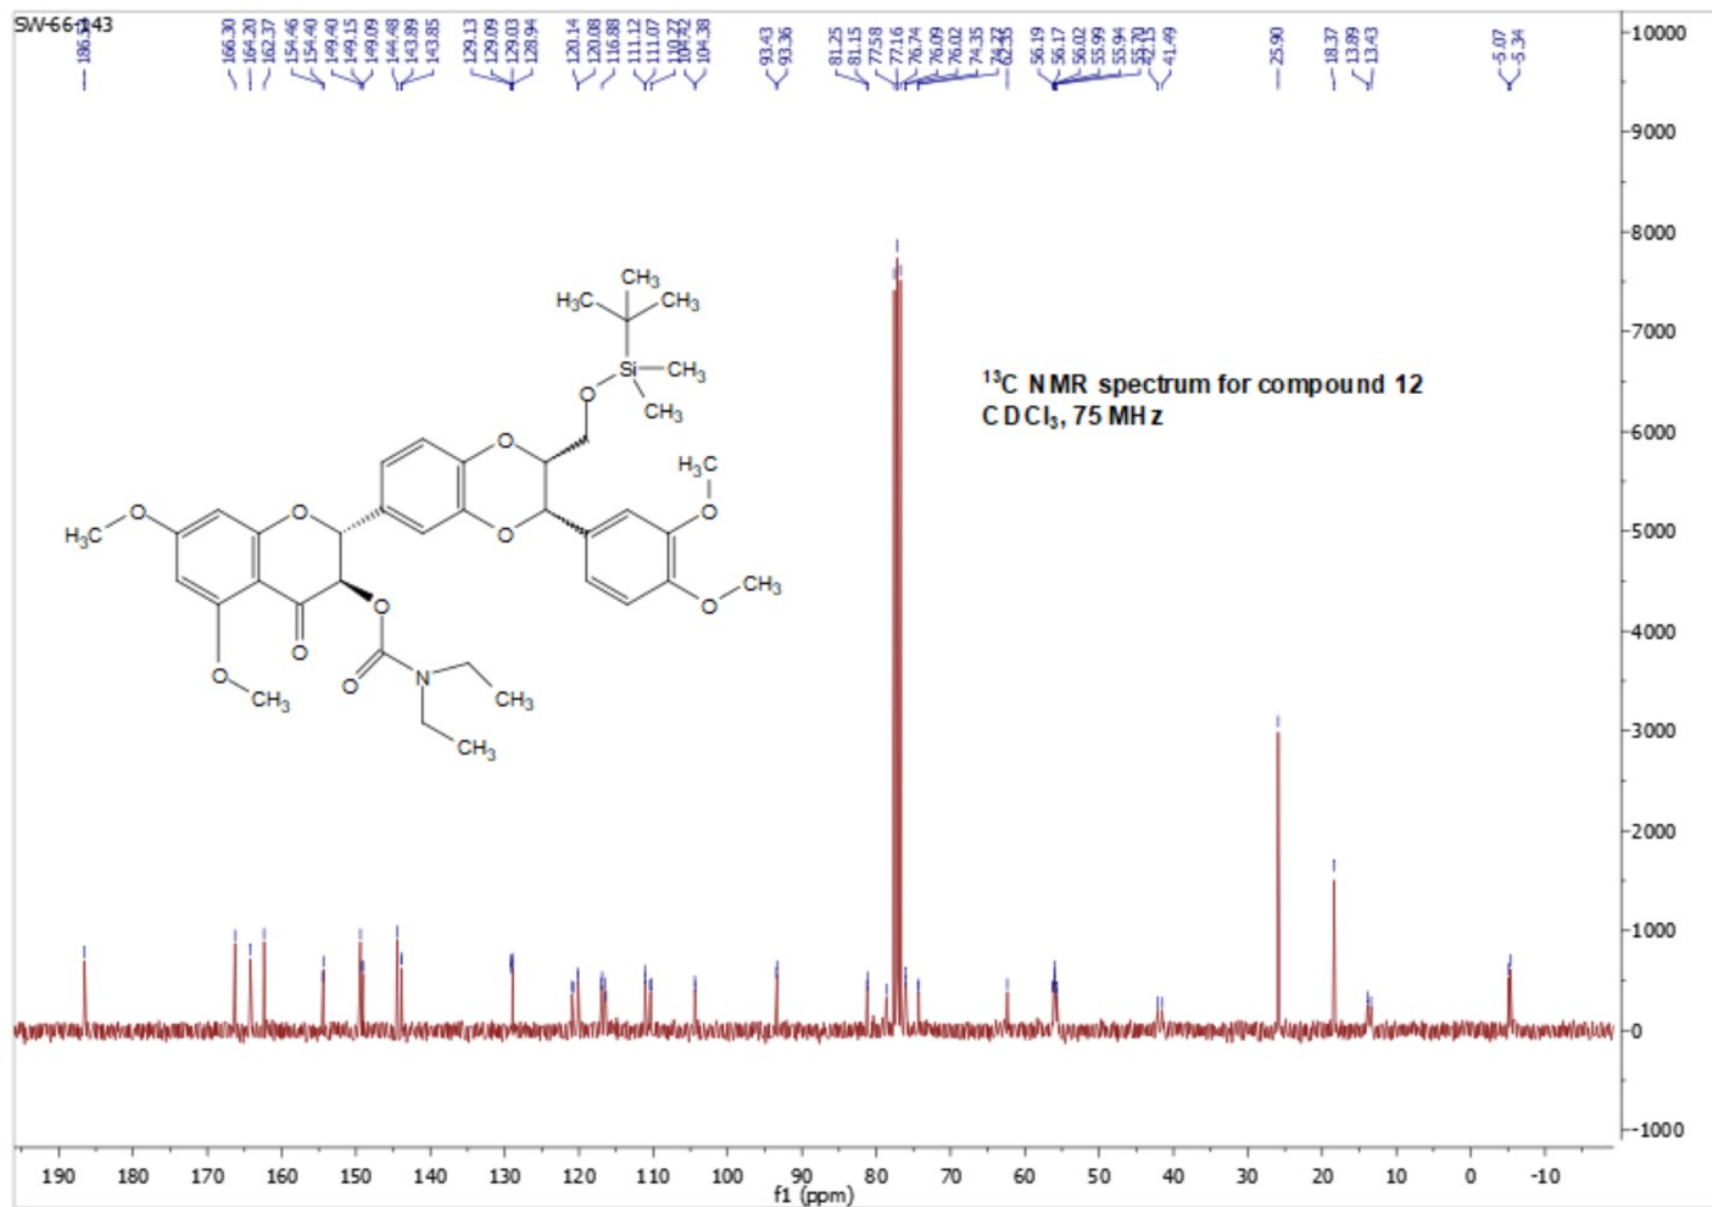

Figure S35: <sup>13</sup>C NMR spectrum of 12 in CDCl<sub>3</sub>

| compds    | Mol. Formula | Exact<br>Mass | M+H      | Observed        | delta  | ppm  |
|-----------|--------------|---------------|----------|-----------------|--------|------|
| SW-66-143 | C39H51NO11Si | 737.3232      | 738.3310 | <b>738.3329</b> | 0.0019 | 2.57 |

SW-66-143 #2970-3159 RT: 15.56-16.59 AV: 190 NL: 5.40E8  
T: FTMS + c NSI Full ms [150.0000-1000.0000]

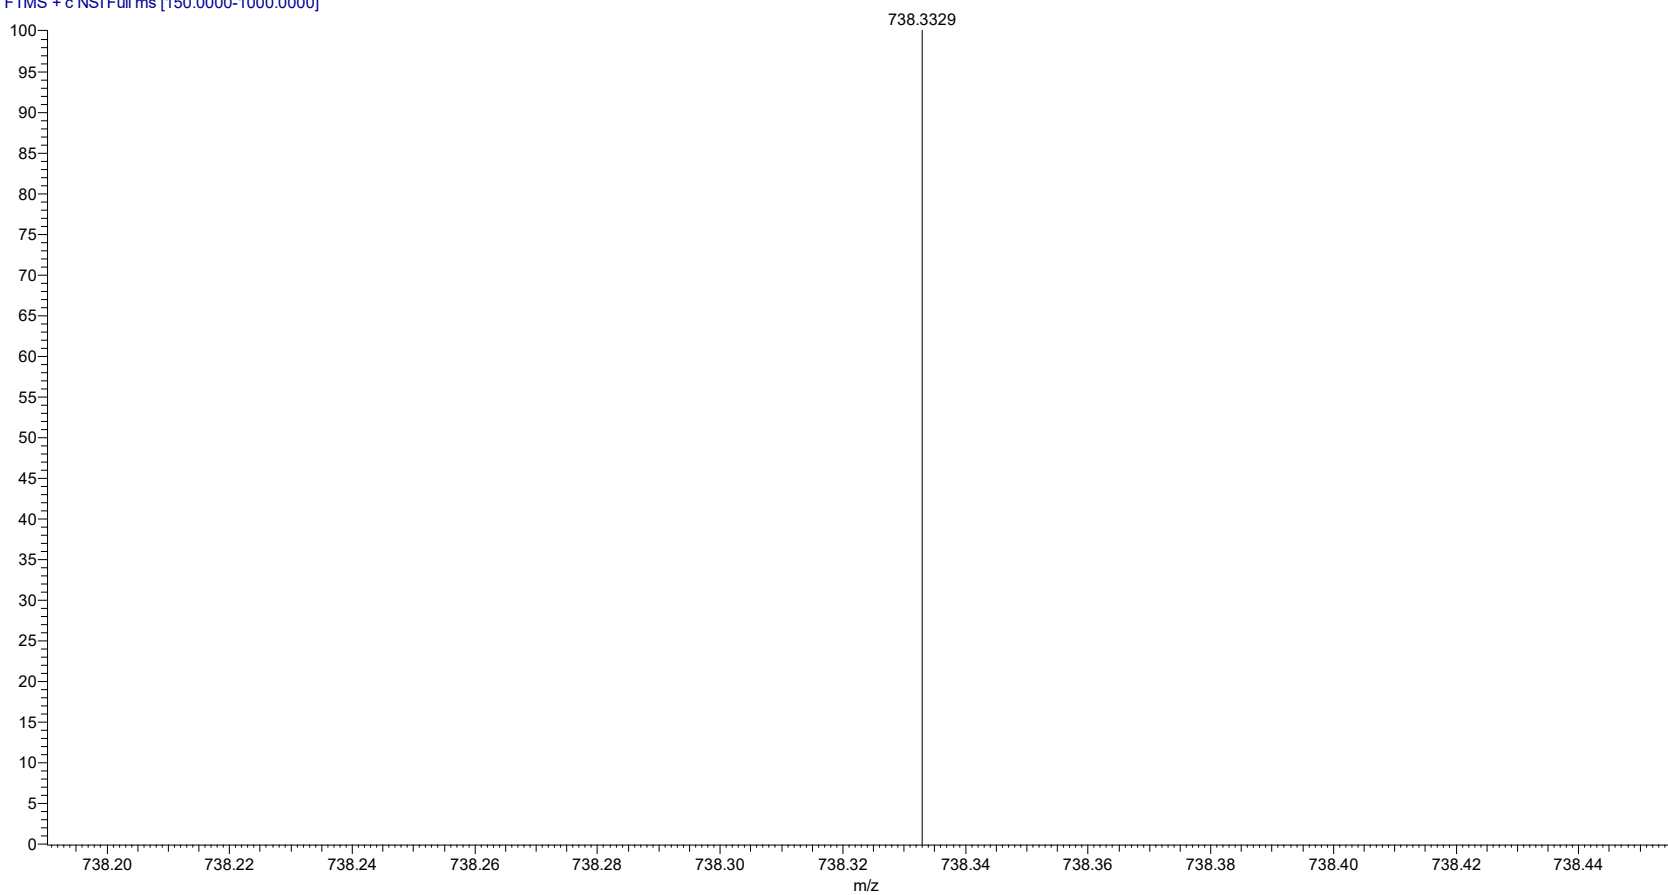

**Figure S36:** High resolution mass spectrum of **12**

```
=====
Injection Date   : 9/13/2021 2:48:00 PM
Sample Name      : SW-66-95                Location : Vial 1
Acq. Operator    :
Method           : C:\HPCHEM\1\METHODS\JNP2015.M
Last changed     : 9/13/2021 2:42:55 PM
                  (modified after loading)
=====
```

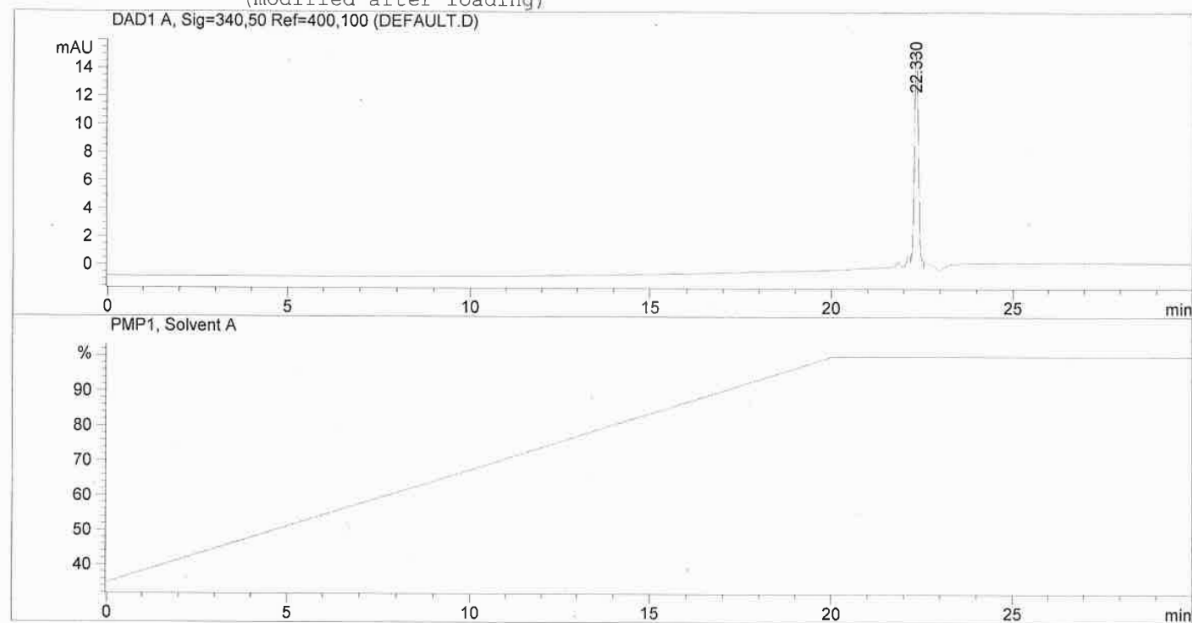

```
=====
Area Percent Report
=====
```

```
Sorted By      : Signal
Multiplier     : 1.0000
Dilution       : 1.0000
```

Signal 1: DAD1 A, Sig=340,50 Ref=400,100

| Peak # | RetTime [min] | Type | Width [min] | Area [mAU*s] | Height [mAU] | Area %   |
|--------|---------------|------|-------------|--------------|--------------|----------|
| 1      | 22.330        | VB   | 0.1206      | 115.30704    | 15.17783     | 100.0000 |

```
Totals :                      115.30704  15.17783
```

Results obtained with enhanced integrator!

```
=====
*** End of Report ***
=====
```

Figure S37: HPLC chromatogram of 12

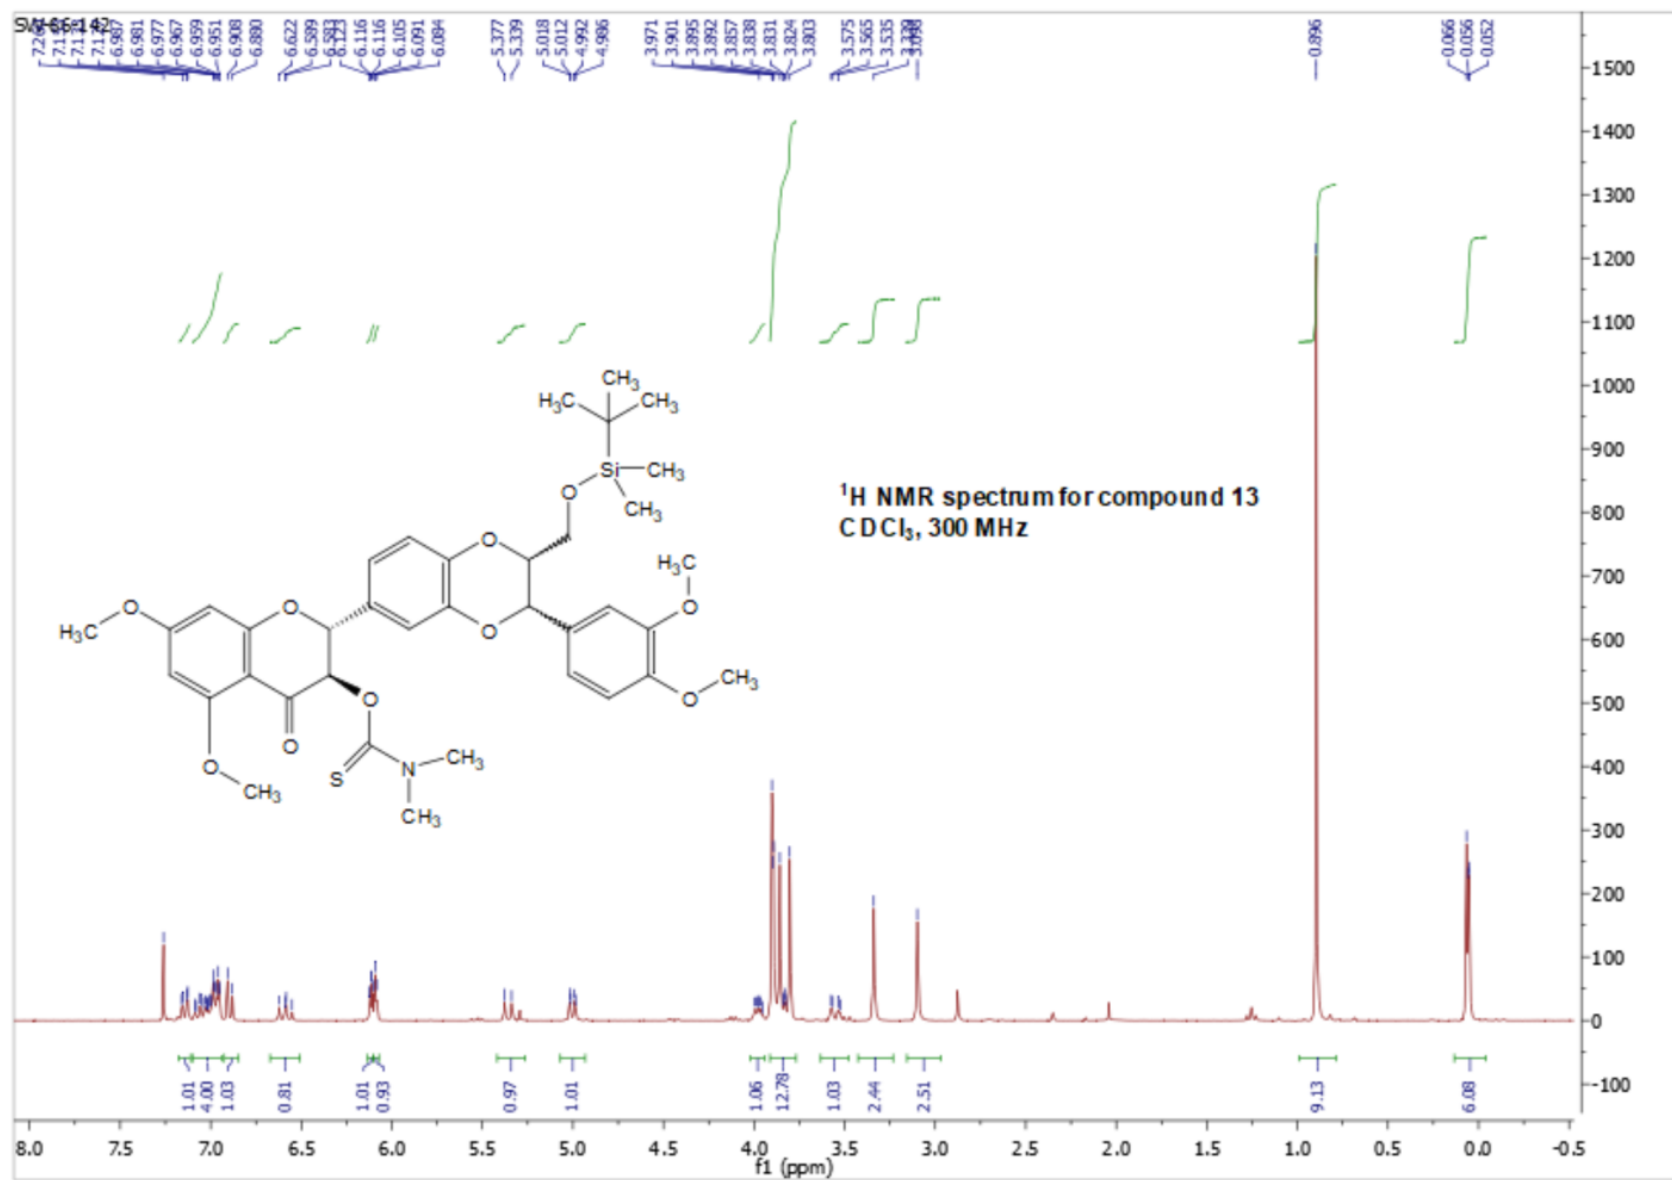

**Figure S38:** <sup>1</sup>H NMR spectrum of **13** in CDCl<sub>3</sub>

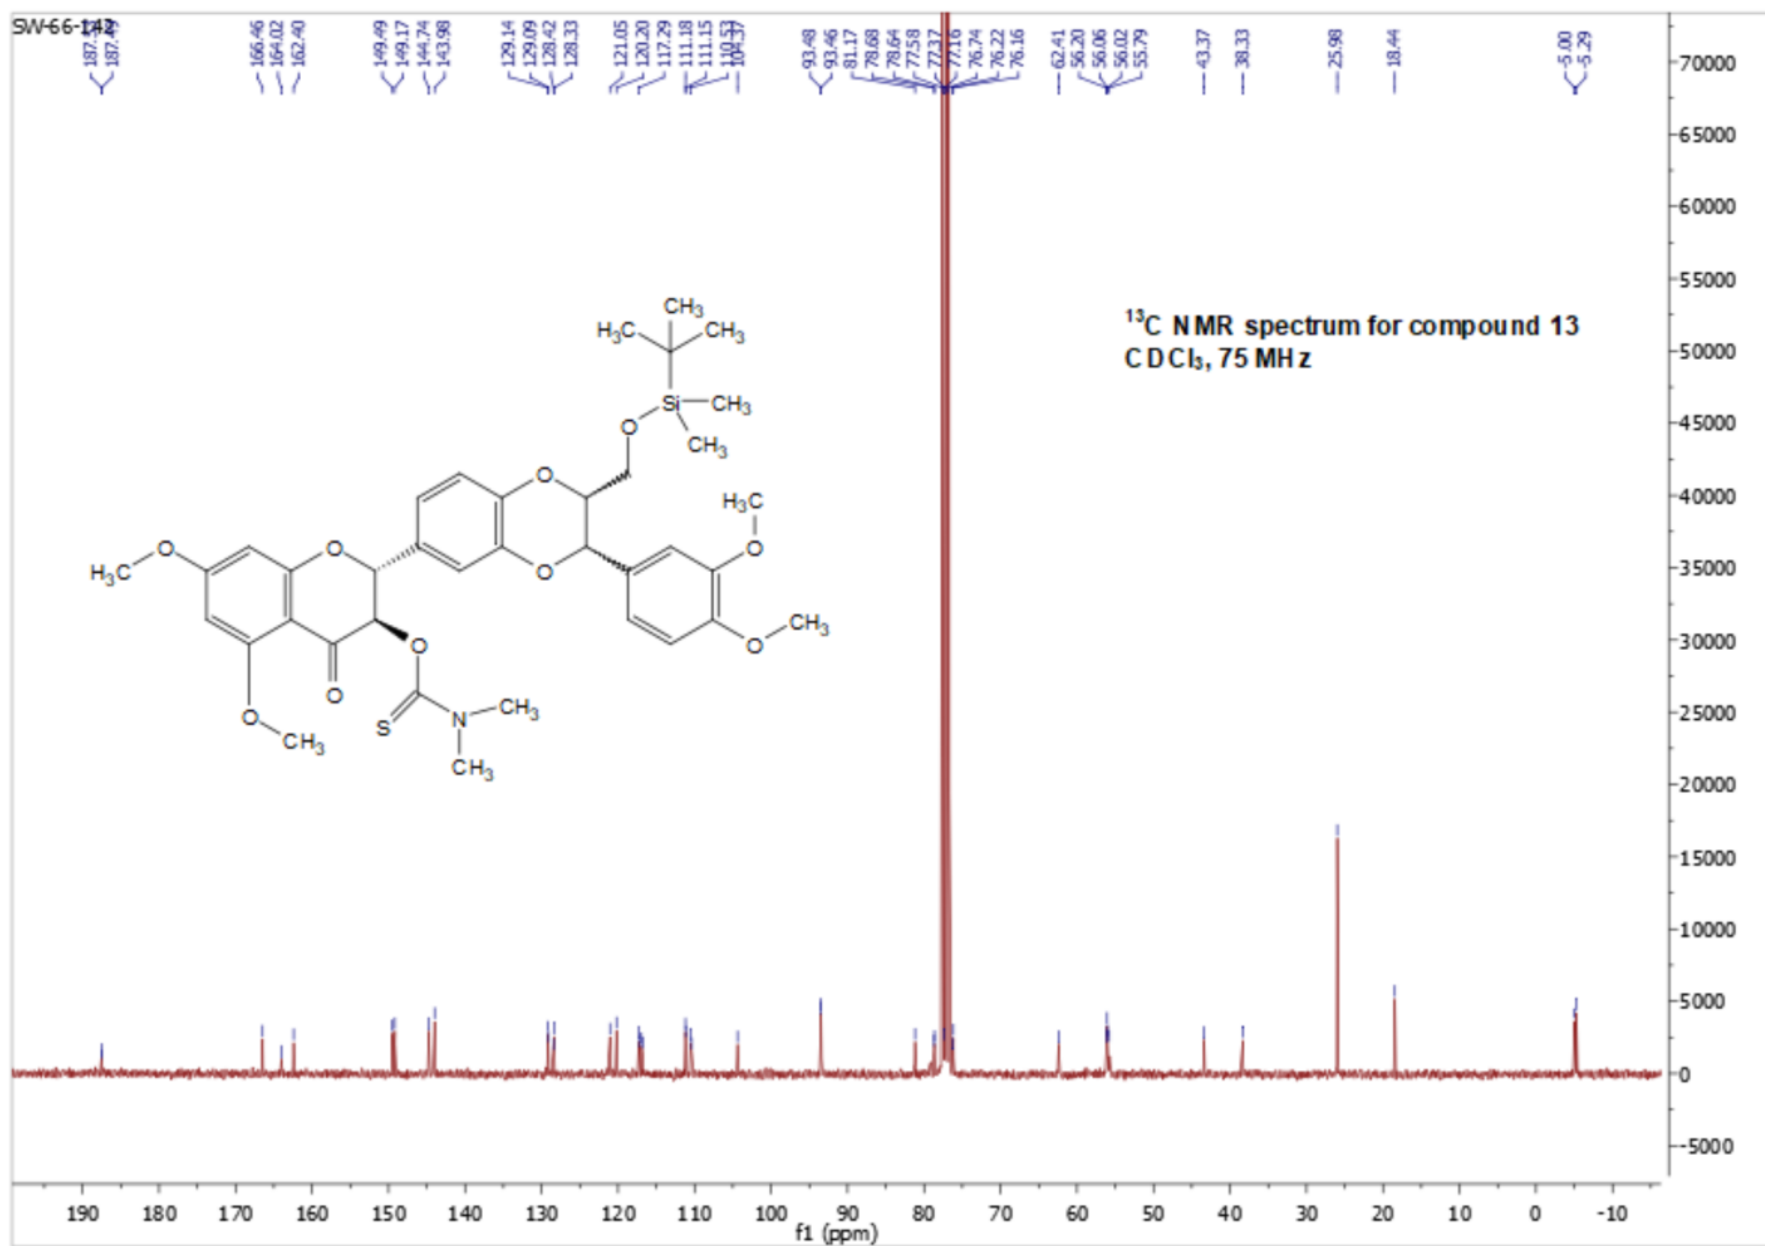

Figure S39: <sup>13</sup>C NMR spectrum of **13** in CDCl<sub>3</sub>

| comps     | Mol. Formula  | Exact Mass | M+H      | Observed        | delta  | ppm  |
|-----------|---------------|------------|----------|-----------------|--------|------|
| SW-66-142 | C37H47NO10SSi | 725.2691   | 726.2769 | <b>726.2796</b> | 0.0027 | 3.79 |

SW-66-142 #4940-5072 RT: 26.70-27.40 AV: 133 NL: 8.33E7  
T: FTMS + c NSI Full ms [150.0000-1000.0000]

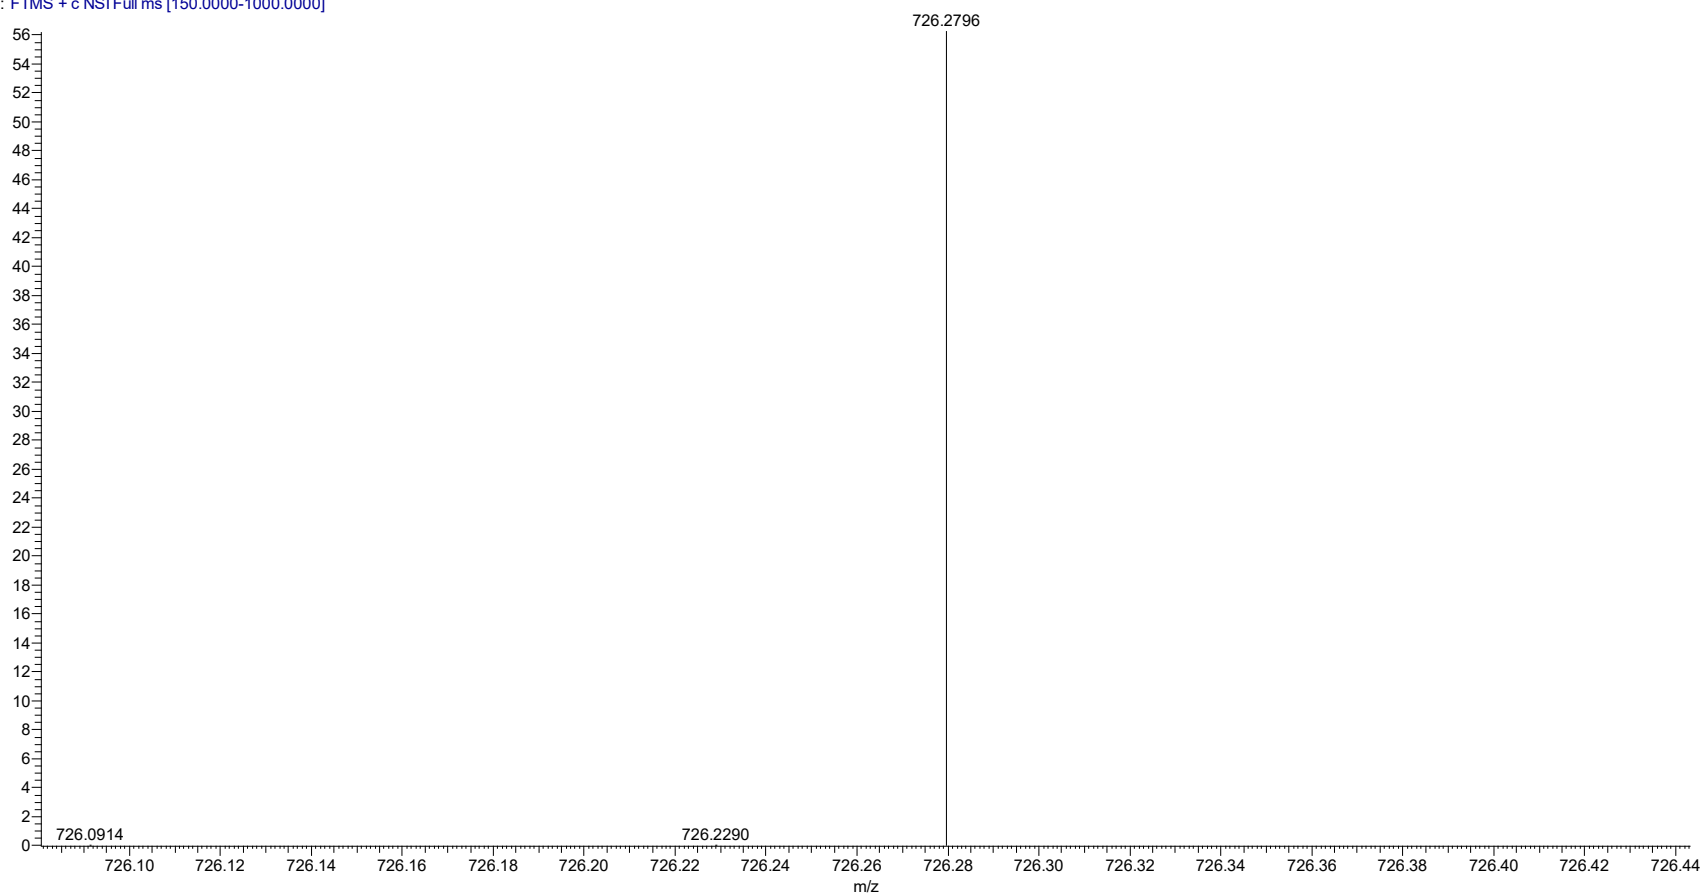

**Figure S40:** High resolution mass spectrum of **13**

```

=====
Injection Date   : 9/13/2021 11:55:21 AM
Sample Name      : SW-66-94                      Location : Vial 1
Acq. Operator    :
Method           : C:\HPCHEM\1\METHODS\JNP2015.M
Last changed     : 9/13/2021 11:53:45 AM
                  (modified after loading)
=====

```

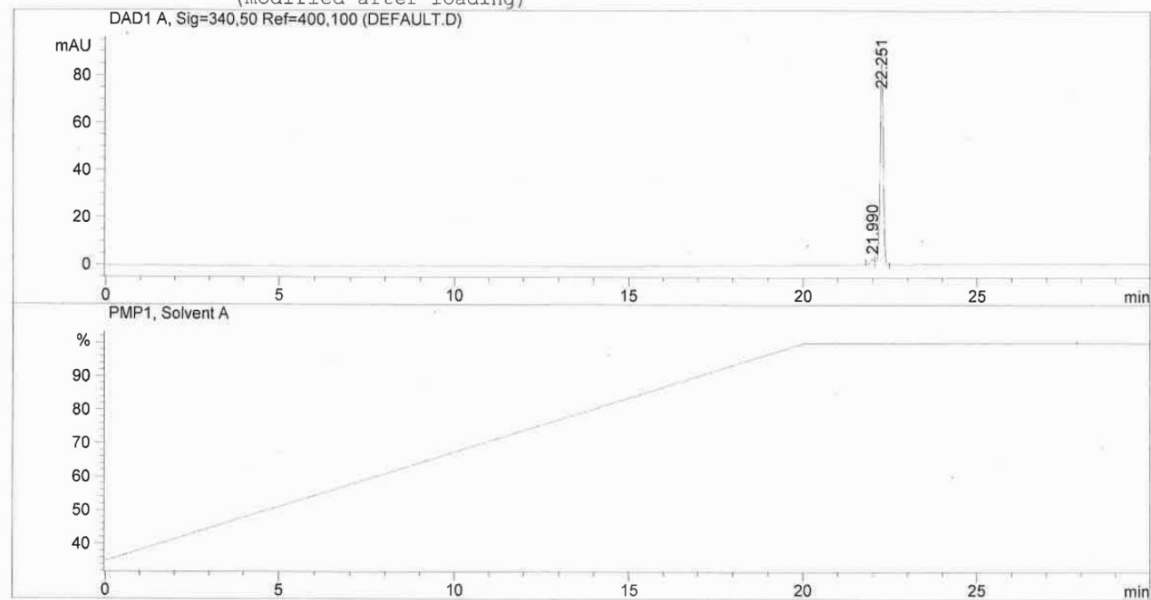

```

=====
Area Percent Report
=====

```

```

Sorted By      : Signal
Multiplier     : 1.0000
Dilution       : 1.0000

```

Signal 1: DAD1 A, Sig=340,50 Ref=400,100

| Peak # | RetTime [min] | Type | Width [min] | Area [mAU*s] | Height [mAU] | Area %  |
|--------|---------------|------|-------------|--------------|--------------|---------|
| 1      | 21.990        | BV   | 0.1080      | 19.44175     | 2.57780      | 3.3204  |
| 2      | 22.251        | VB   | 0.0966      | 566.07684    | 91.02409     | 96.6796 |

```
Totals :                      585.51859  93.60189
```

Results obtained with enhanced integrator!

```

=====
*** End of Report ***
=====

```

Figure S41: HPLC chromatogram of 13



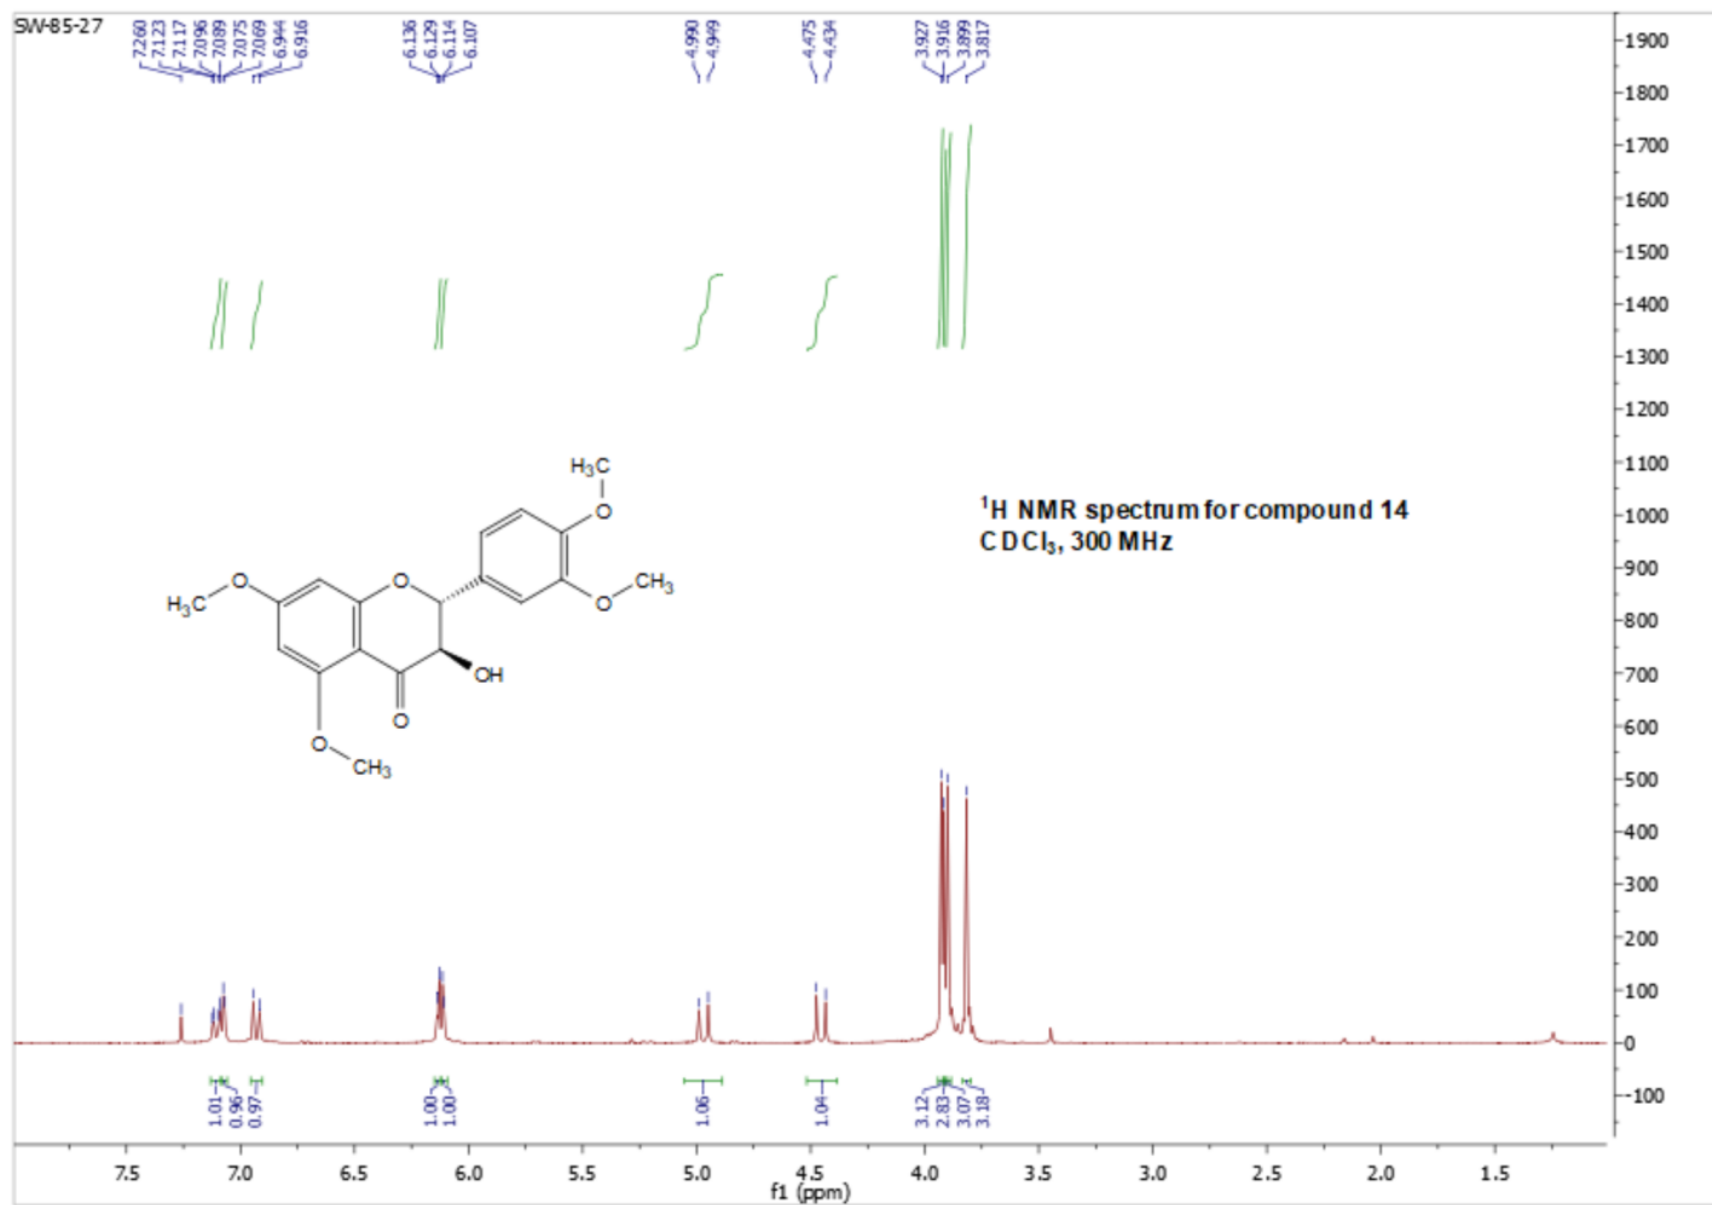

Figure S42: <sup>1</sup>H NMR spectrum of **14** in CDCl<sub>3</sub>

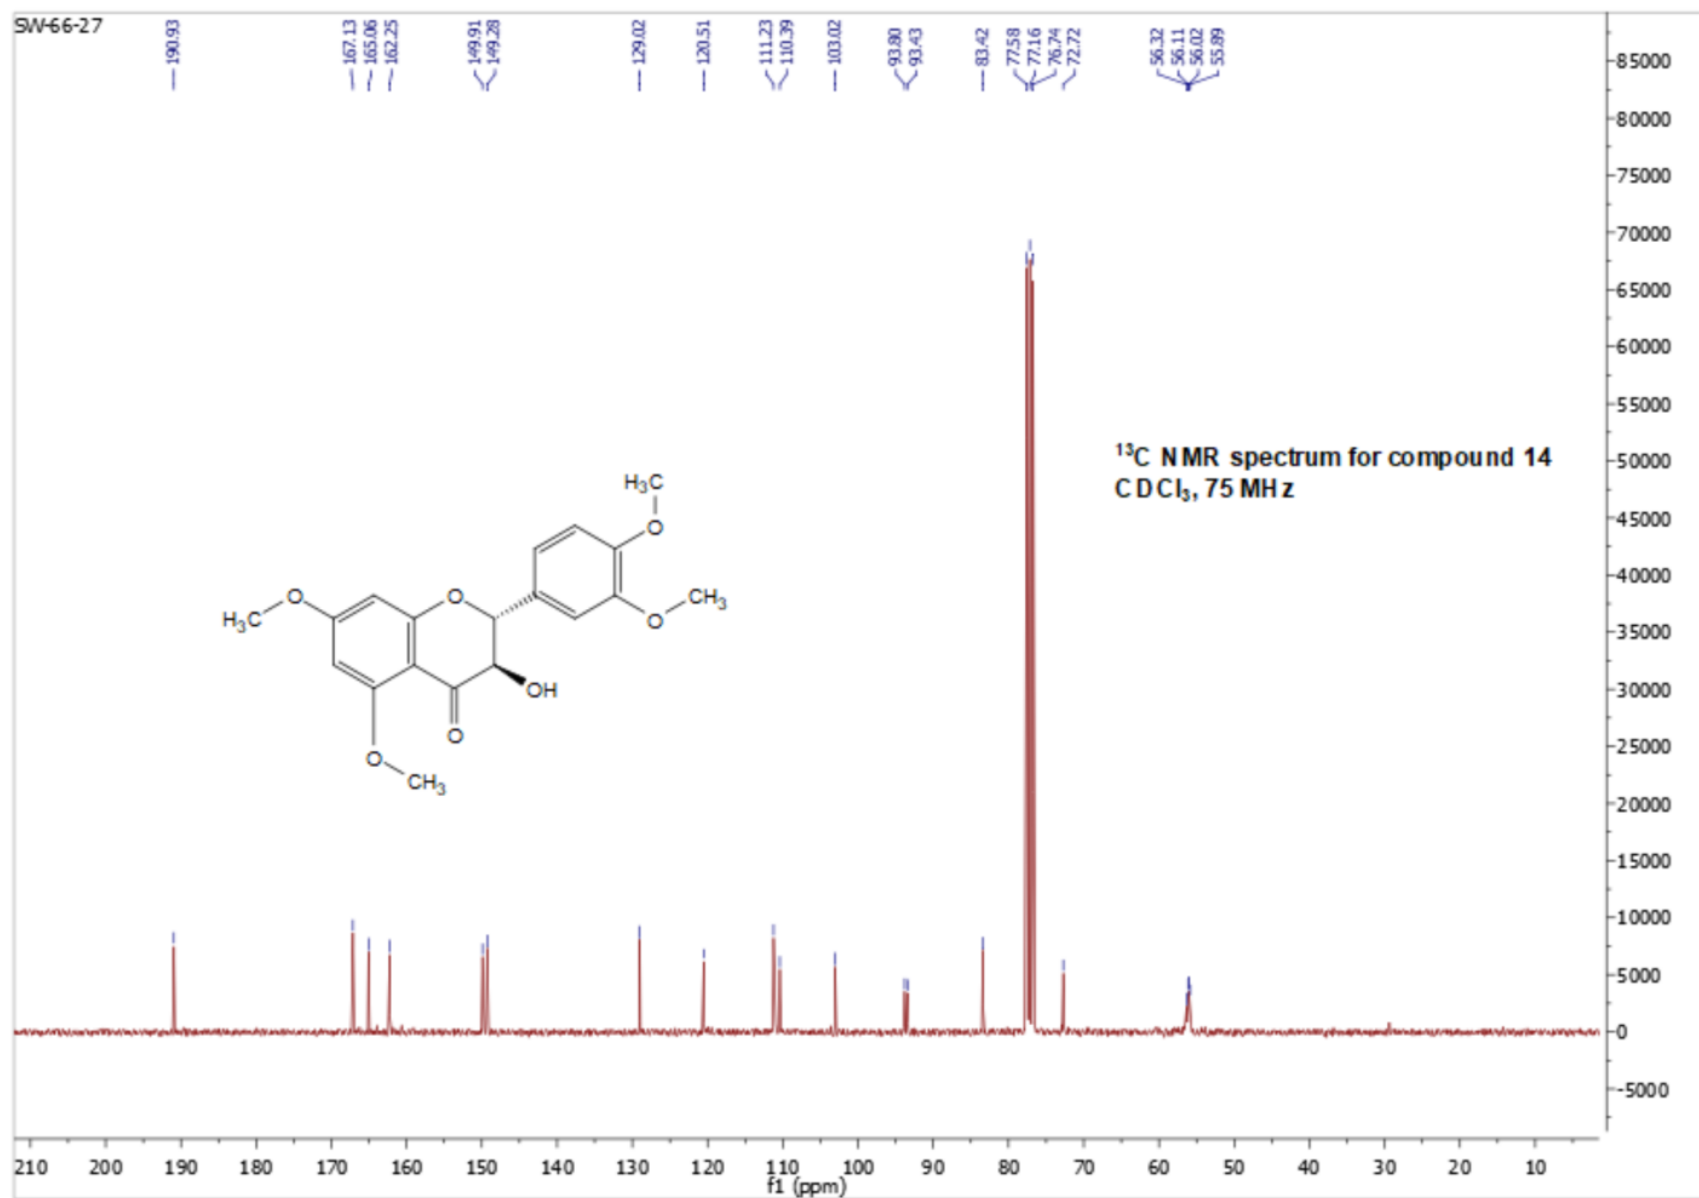

Figure S43: <sup>13</sup>C NMR spectrum of **14** in CDCl<sub>3</sub>

| Sample Name | Mol Fomula | MW       | M+H      | observed | delta   | ppm   |
|-------------|------------|----------|----------|----------|---------|-------|
| SW-85-27    | C19H20O7   | 360.1209 | 361.1287 | 361.1281 | -0.0006 | -1.77 |

SW-85-27 #1554-1728 RT: 8.67-9.55 AV: 175 NL: 2.86E9  
T: FTMS + c NSI Full ms [300.0000-1000.0000]

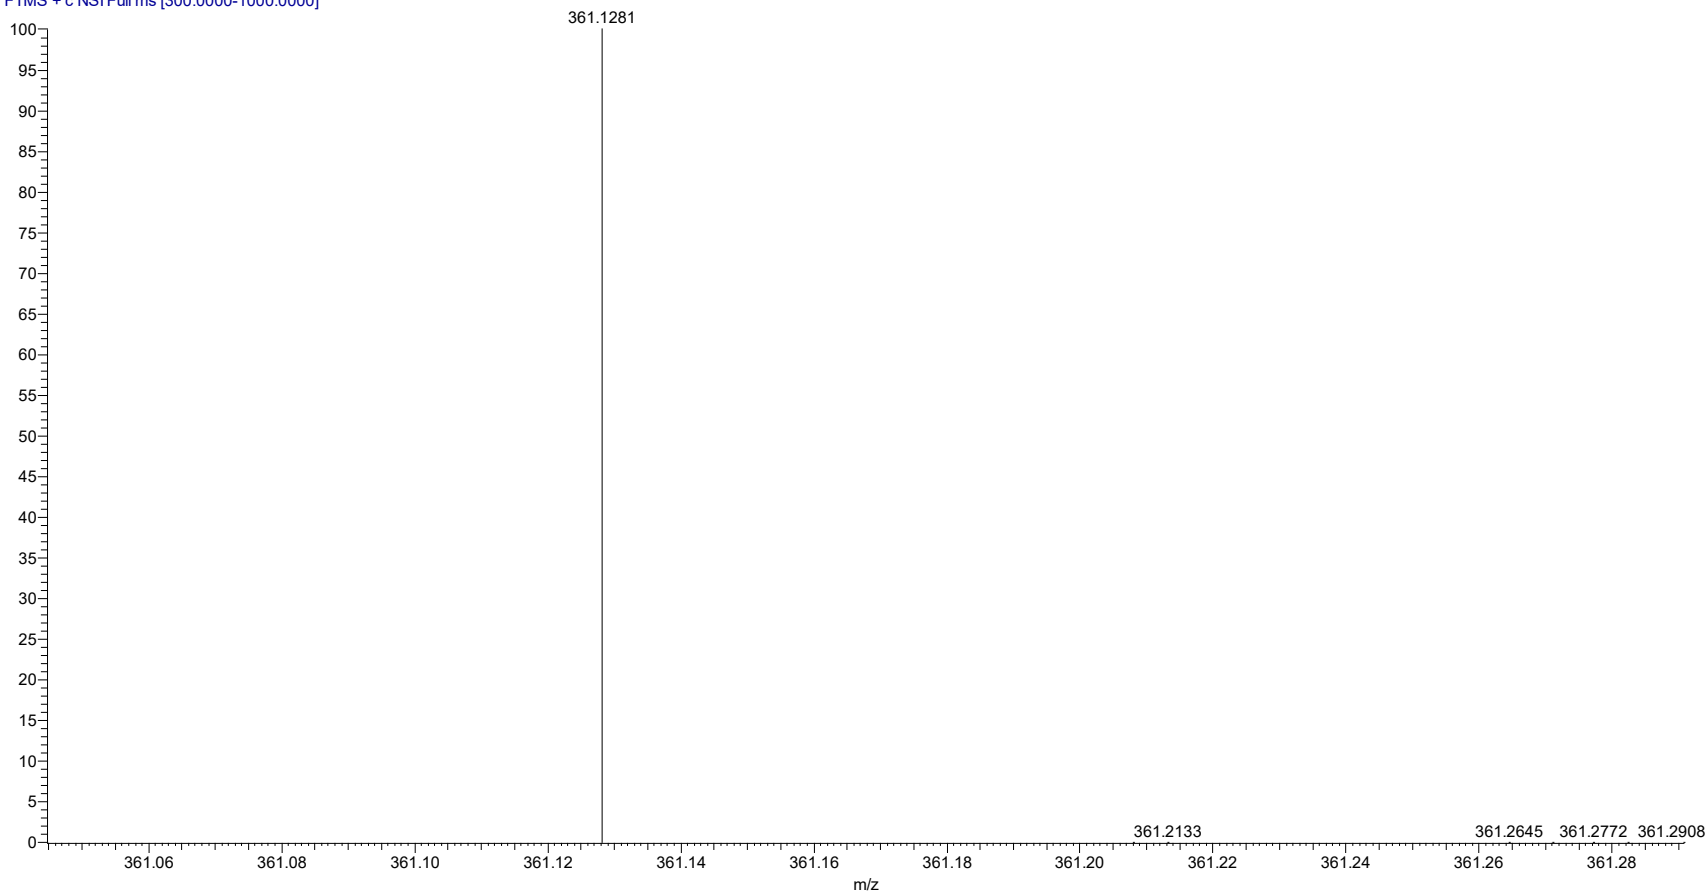

**Figure S44:** High resolution mass spectrum of **14**

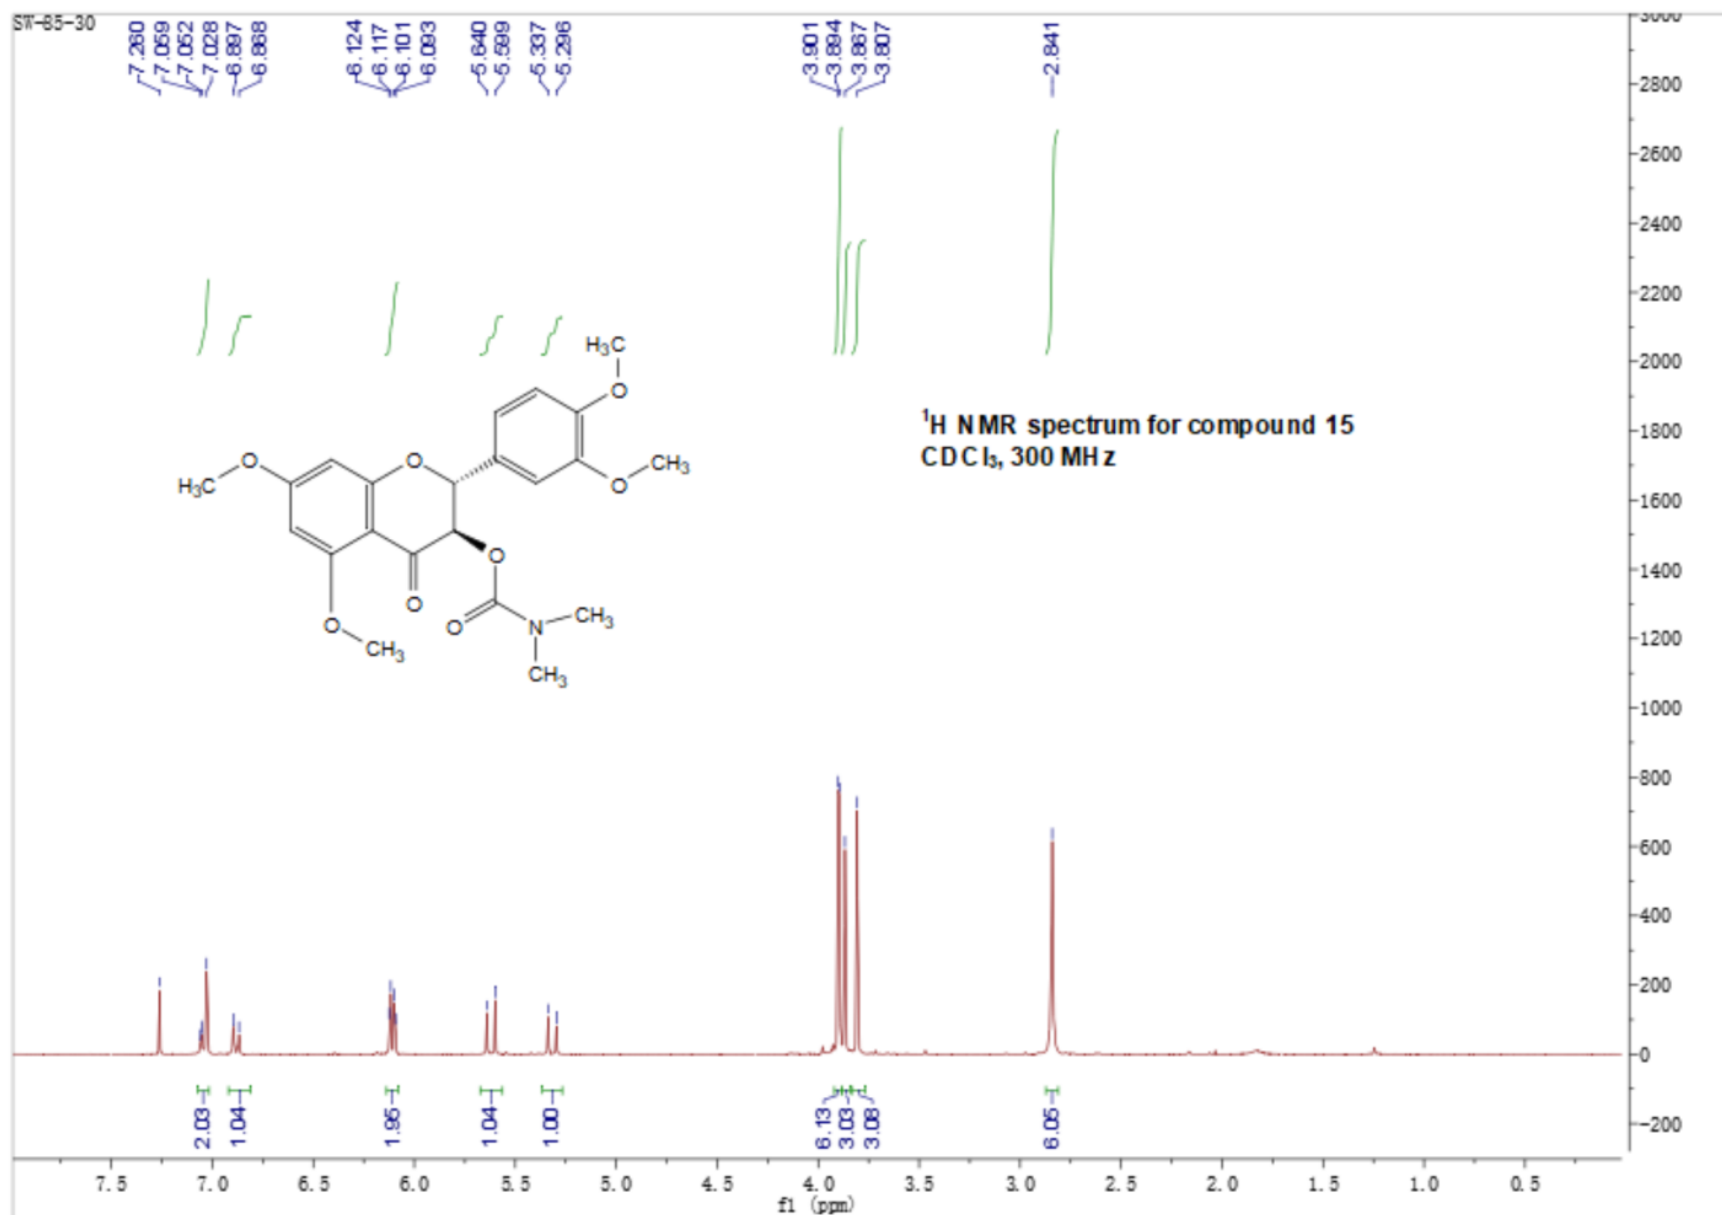

Figure S45: <sup>1</sup>H NMR spectrum of **15** in CDCl<sub>3</sub>

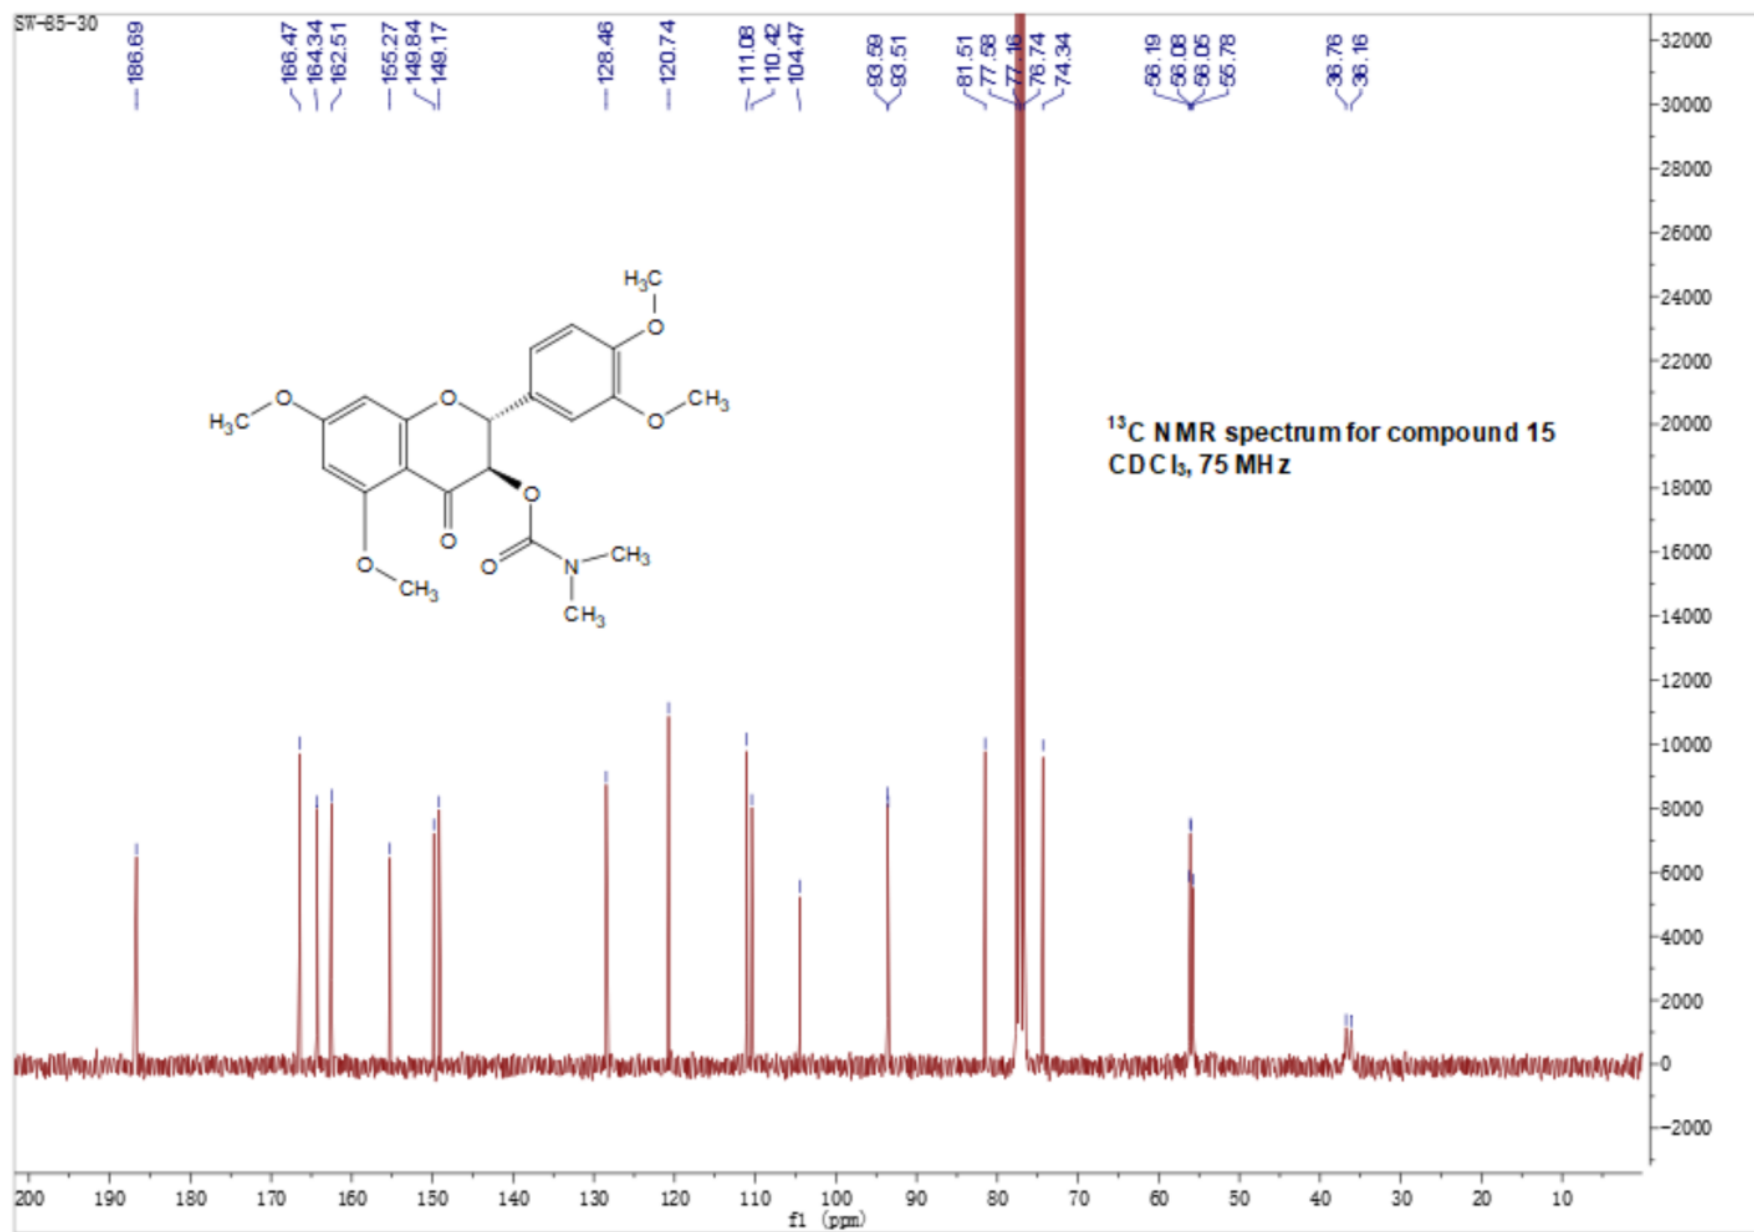

Figure S46:  $^{13}\text{C}$  NMR spectrum of **15** in CDCl<sub>3</sub>

| Sample Name | Mol Fomula | MW       | M+H      | observed | delta   | ppm   |
|-------------|------------|----------|----------|----------|---------|-------|
| SW-85-30    | C22H25NO8  | 431.1581 | 432.1659 | 432.1657 | -0.0002 | -0.37 |

SW-85-30 #1788-1933 RT: 9.86-10.60 AV: 146 NL: 1.78E9  
T: FTMS + c NSI Full ms [300.0000-1000.0000]

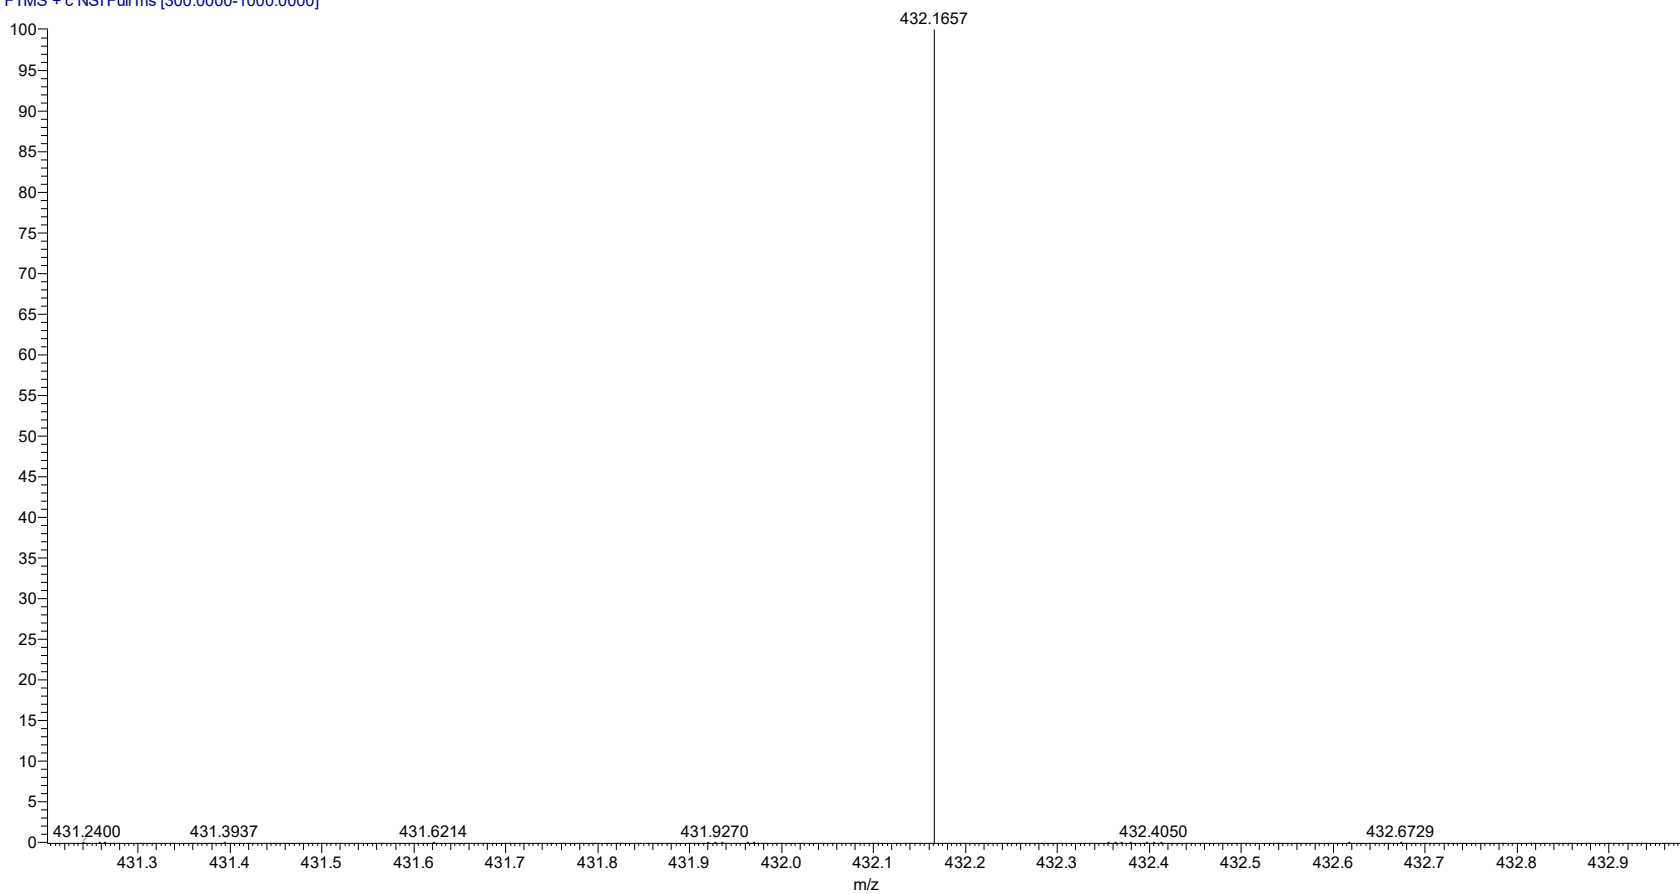

**Figure S47:** High resolution mass spectrum of **15**

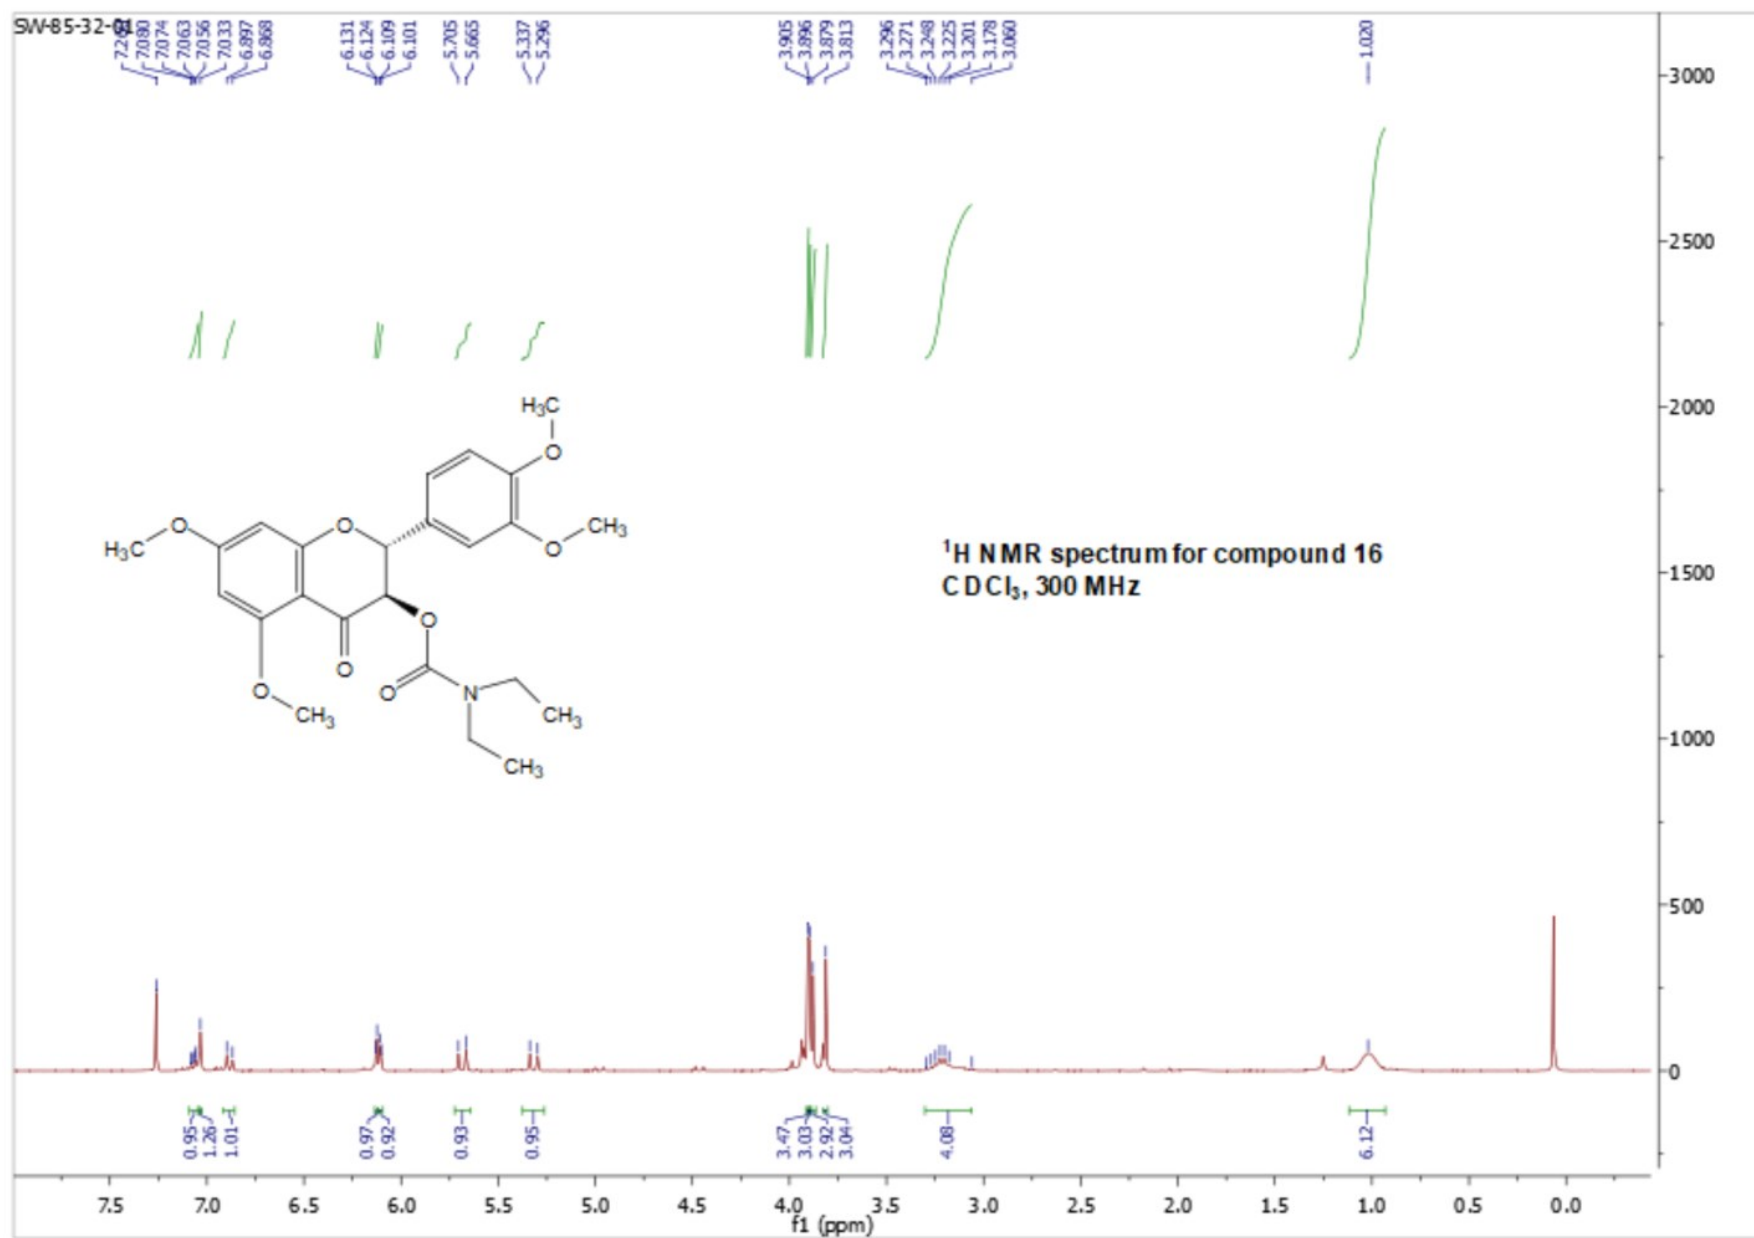

Figure S48: <sup>1</sup>H NMR spectrum of **16** in CDCl<sub>3</sub>

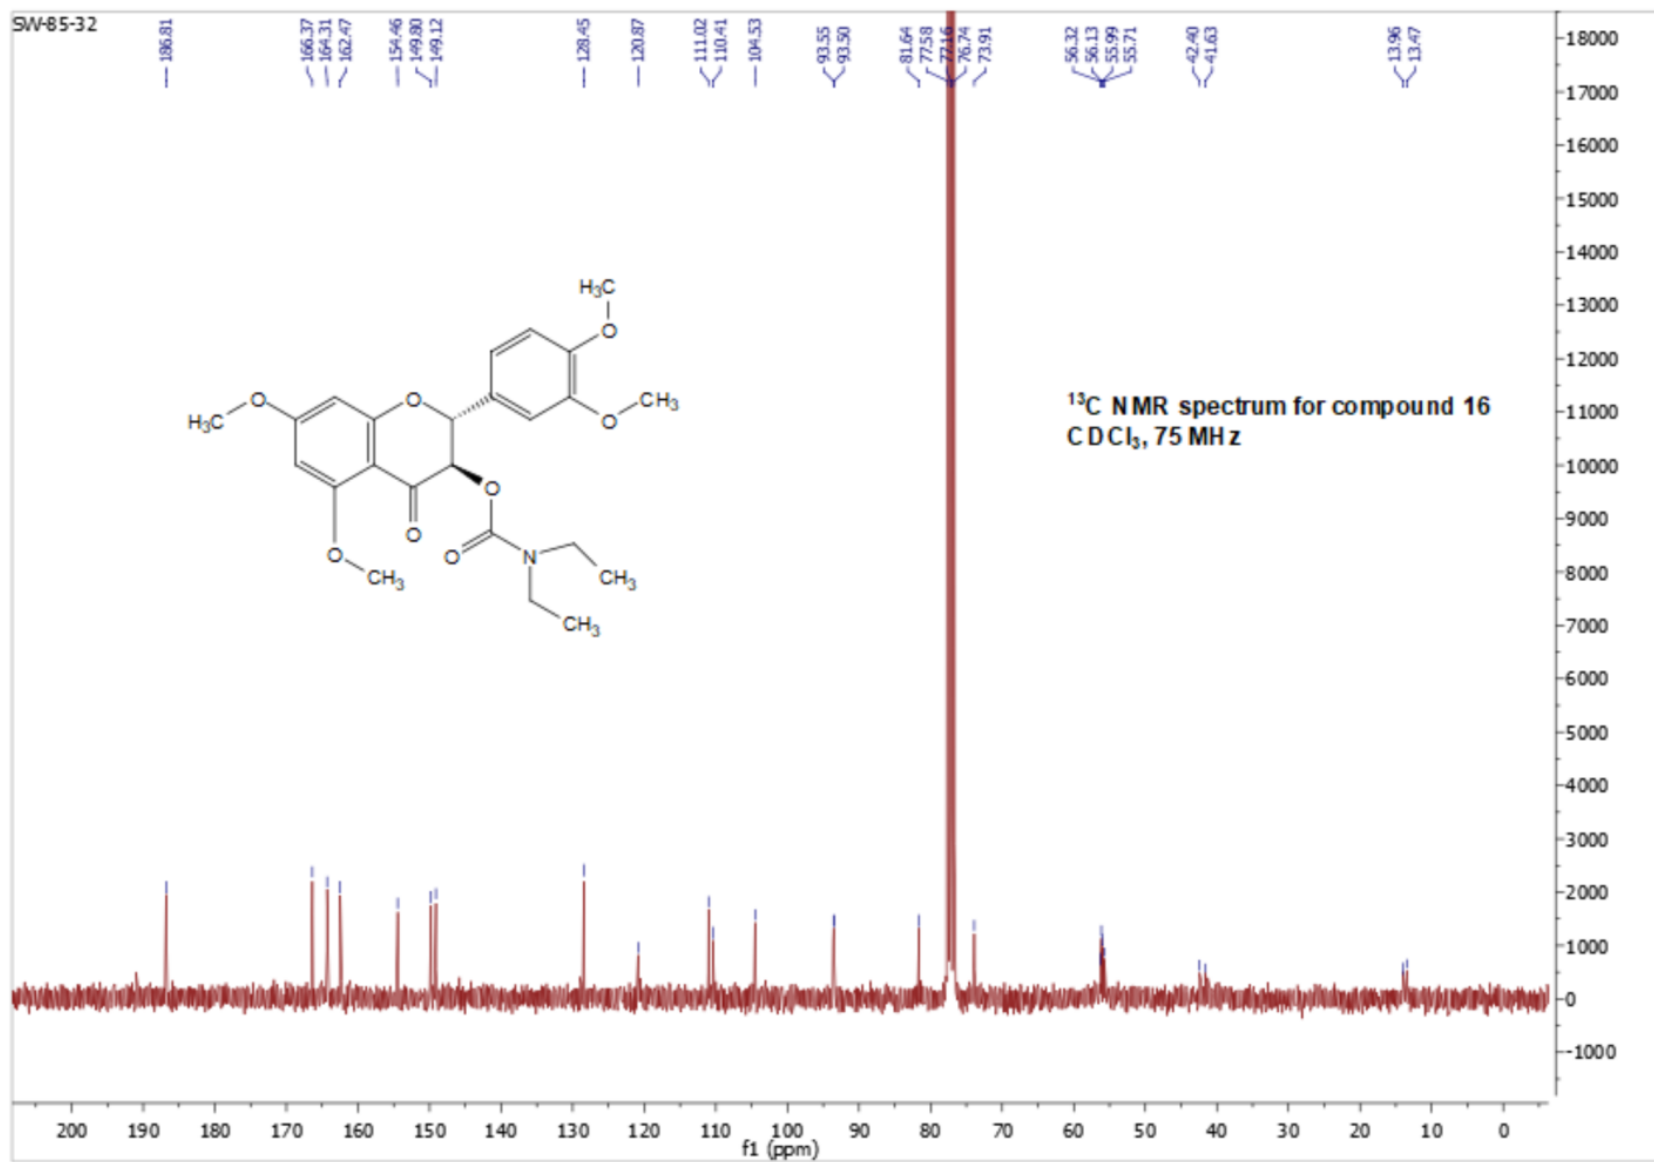

Figure S49: <sup>13</sup>C NMR spectrum of **16** in CDCl<sub>3</sub>



| Sample Name | Mol Fomula                                      | MW       | M+H      | observed | delta   | ppm   |
|-------------|-------------------------------------------------|----------|----------|----------|---------|-------|
| SW-85-32    | C <sub>24</sub> H <sub>29</sub> NO <sub>8</sub> | 459.1894 | 460.1972 | 460.1970 | -0.0002 | -0.35 |

SW-85-32 #1912-2071 RT: 10.49-11.30 AV: 160 NL: 9.20E8  
T: FTMS + c NSI Full ms [300.0000-1000.0000]

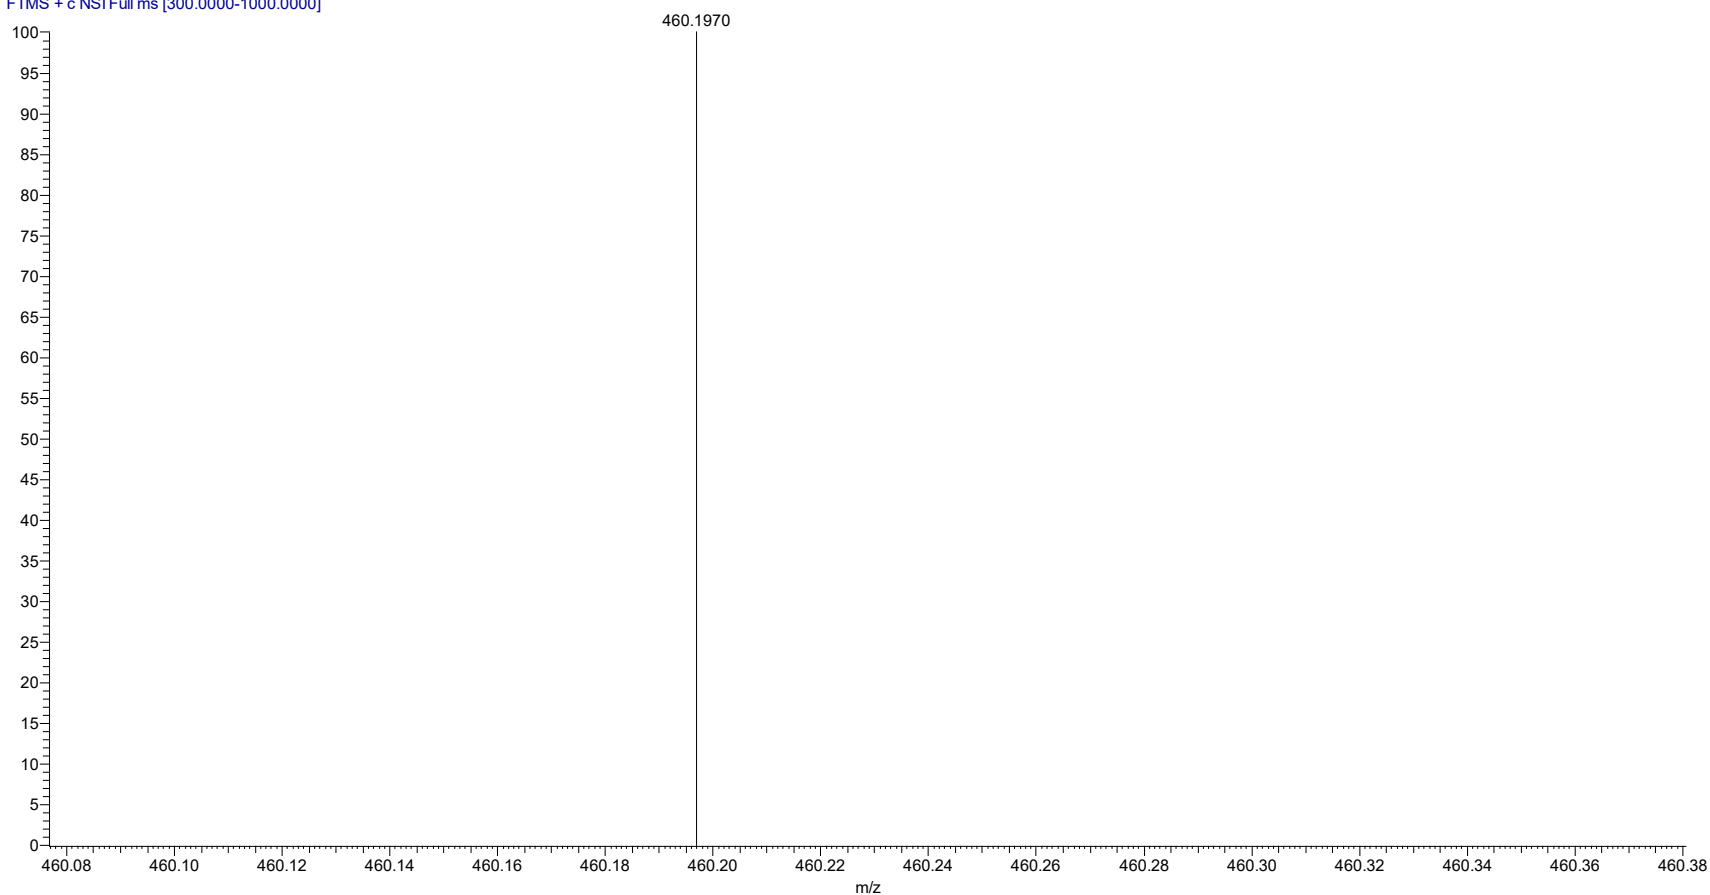

**Figure S50:** High resolution mass spectrum of **16**



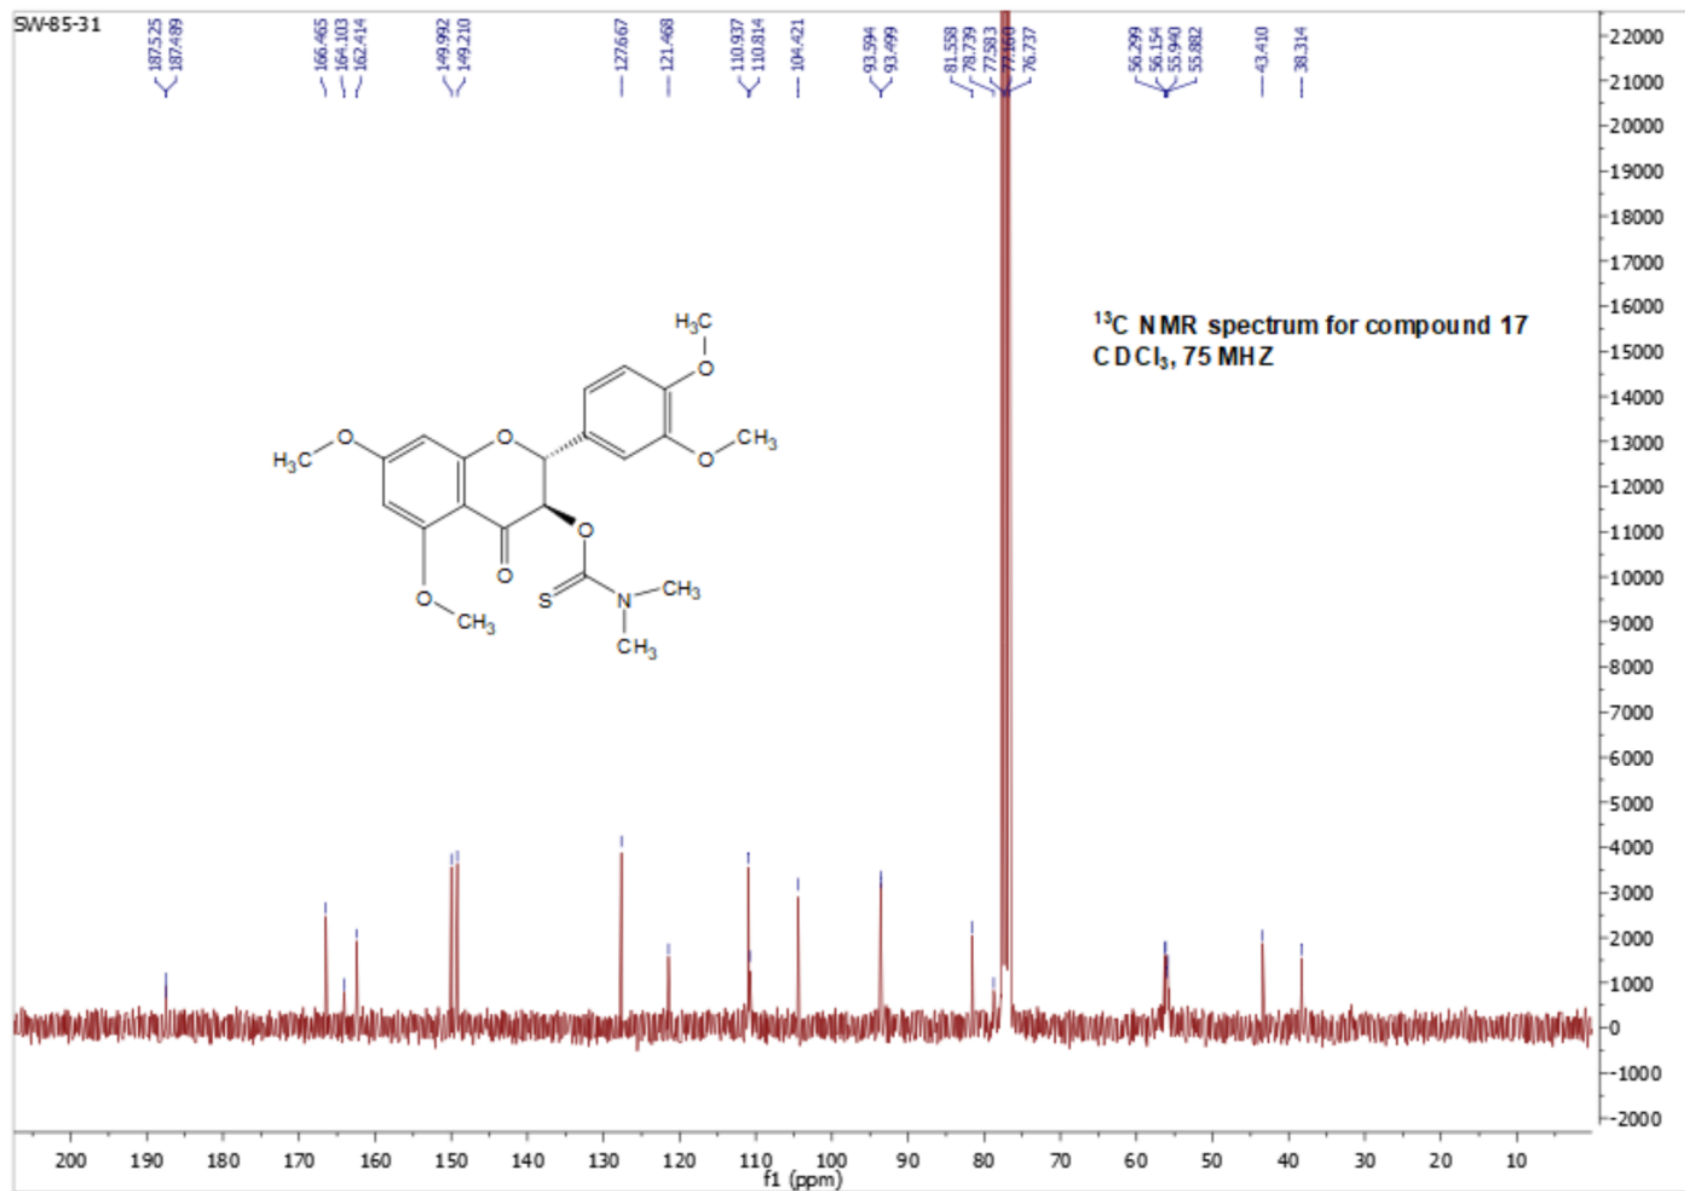

Figure S52: <sup>13</sup>C NMR spectrum of **17** in CDCl<sub>3</sub>

| Sample Name | Mol Fomula | MW       | M+H      | observed | delta  | ppm  |
|-------------|------------|----------|----------|----------|--------|------|
| SW-85-31    | C22H25NO7S | 447.1352 | 448.1430 | 448.1431 | 0.0001 | 0.20 |

SW-85-31 #1933-2007 RT: 10.60-10.98 AV: 75 NL: 1.55E9  
T: FTMS + c NSI Full ms [300.0000-1000.0000]

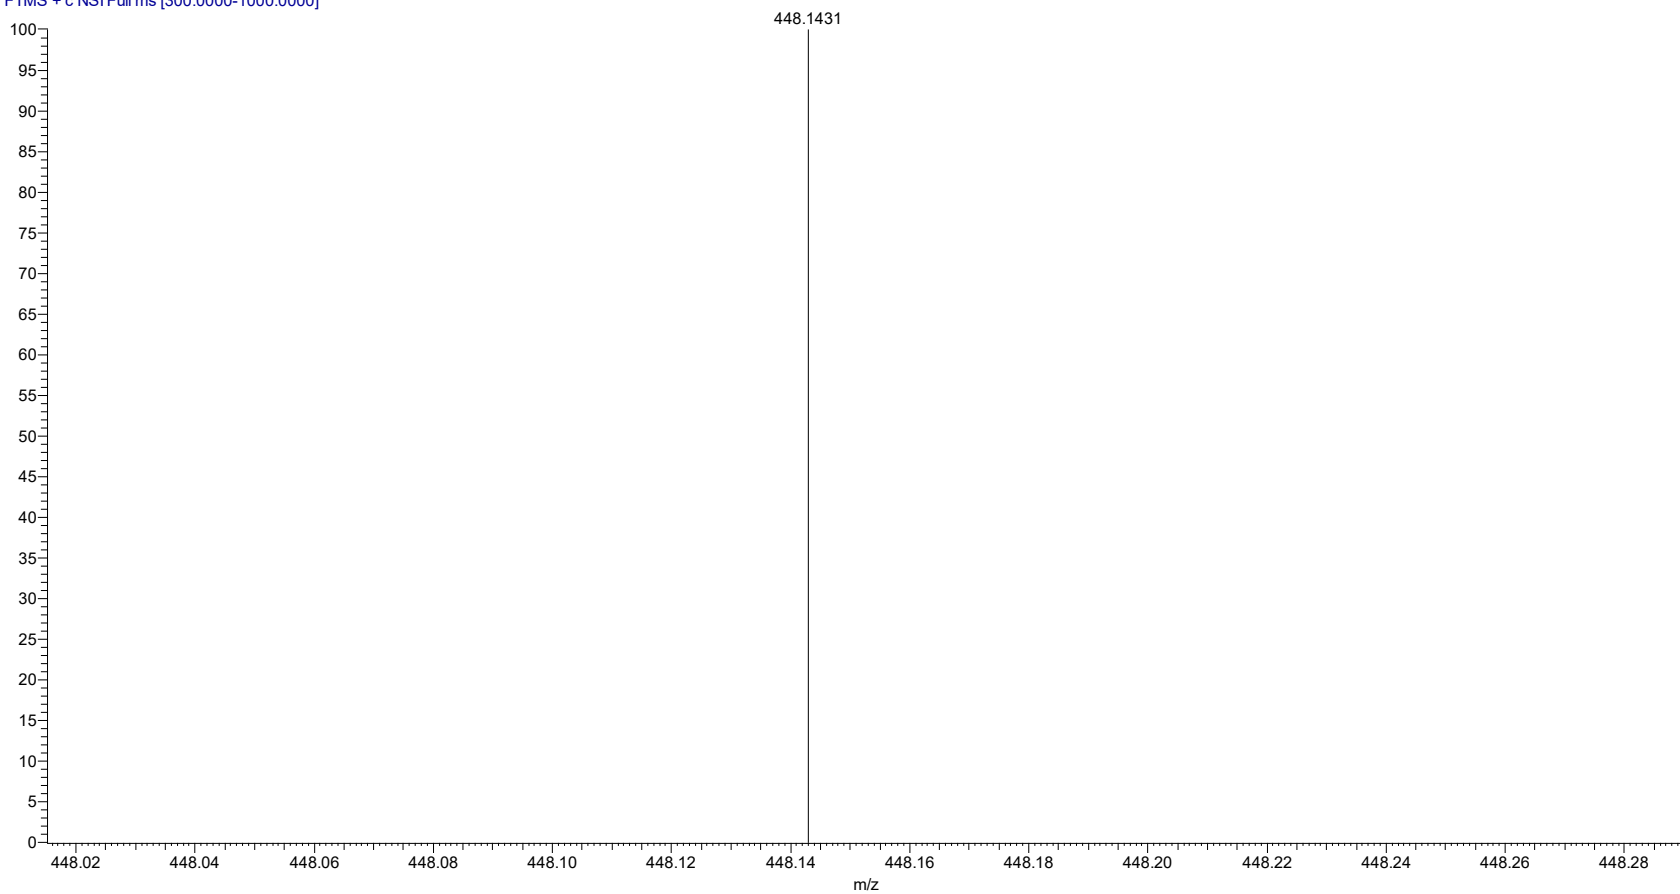

**Figure S53:** High resolution mass spectrum of **17**

**Figure S54:** The concentration-effect curves that were used to calculate the IC<sub>50</sub> values from the WST-1 cell proliferation assay

1. The curves that we used to calculate the IC<sub>50</sub> value for compound **3** against PC-3

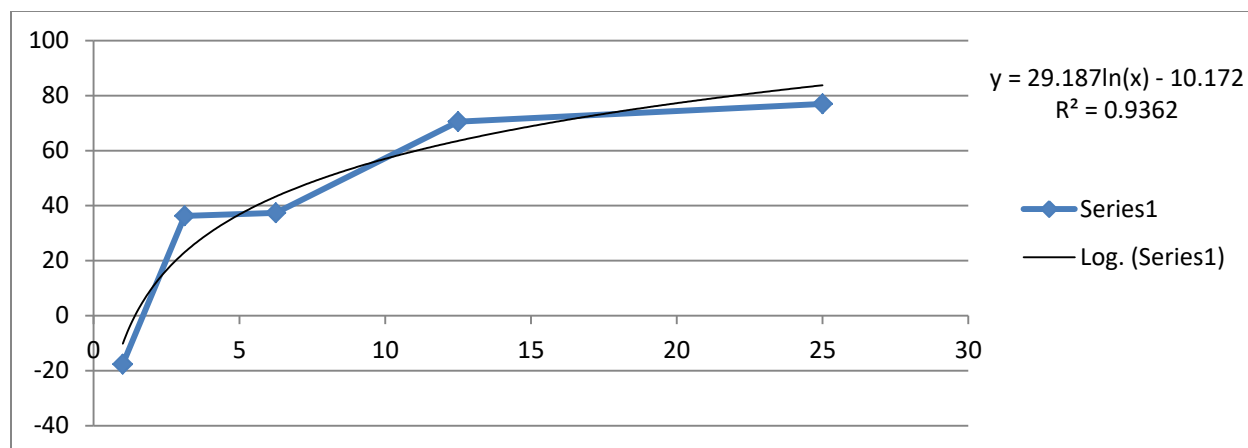

X-axis = concentration (μM) of compound **3**

Y-axis = % Cell Proliferation Inhibition

IC<sub>50</sub> = 7.858 μM

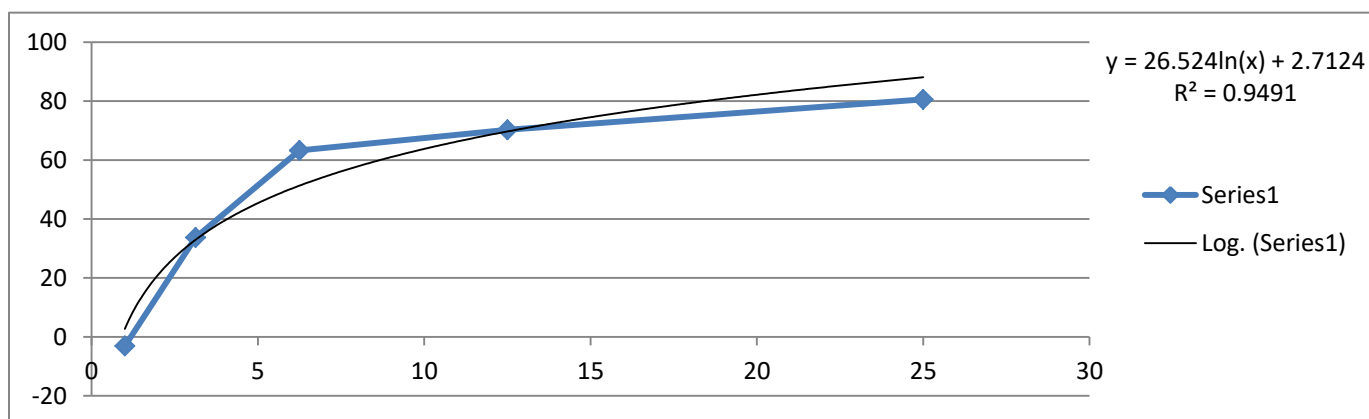

X-axis = concentration (μM) of compound **3**

Y-axis = % Cell Proliferation Inhibition

IC<sub>50</sub> = 5.946 μM

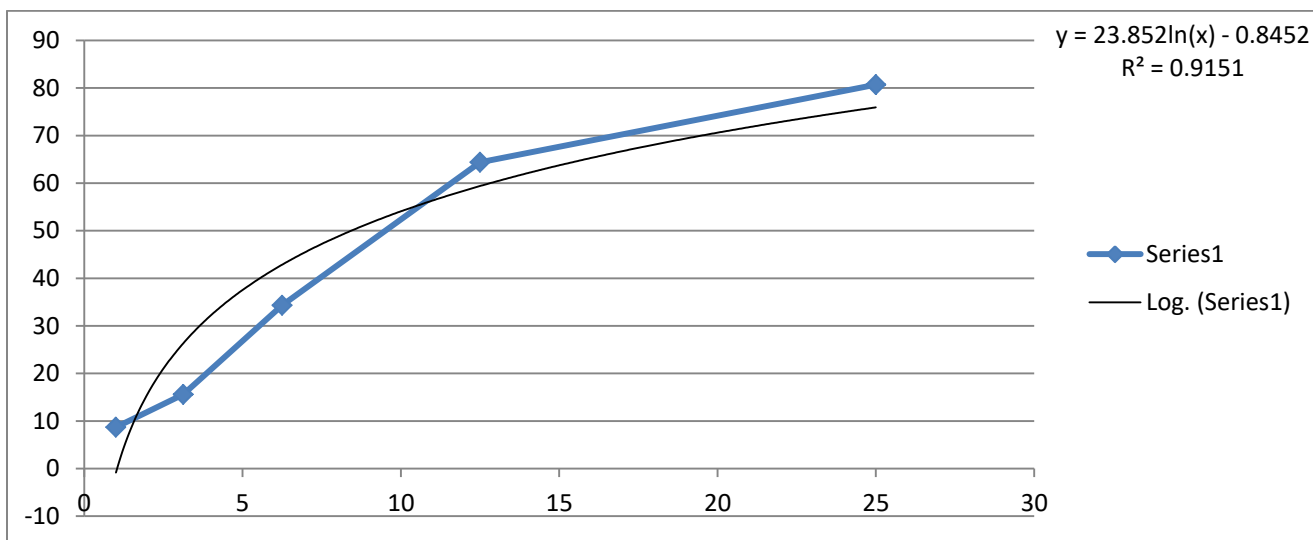

X-axis = concentration (μM) of compound **3**

Y-axis = % Cell Proliferation Inhibition

IC<sub>50</sub> = 8.429 μM

2. The curves that we used to calculate the IC<sub>50</sub> value for compound **3** against DU145

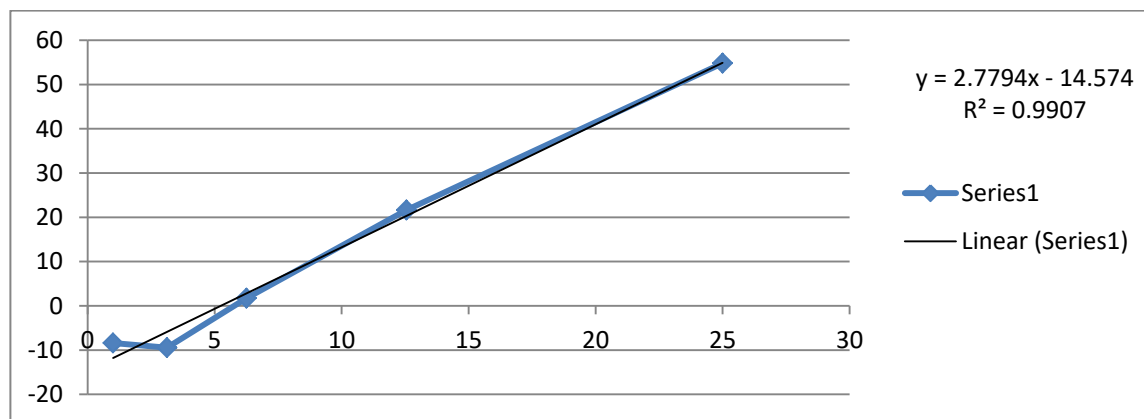

X-axis = concentration (μM) of compound **3**

Y-axis = % Cell Proliferation Inhibition

IC<sub>50</sub> = 23.233 μM

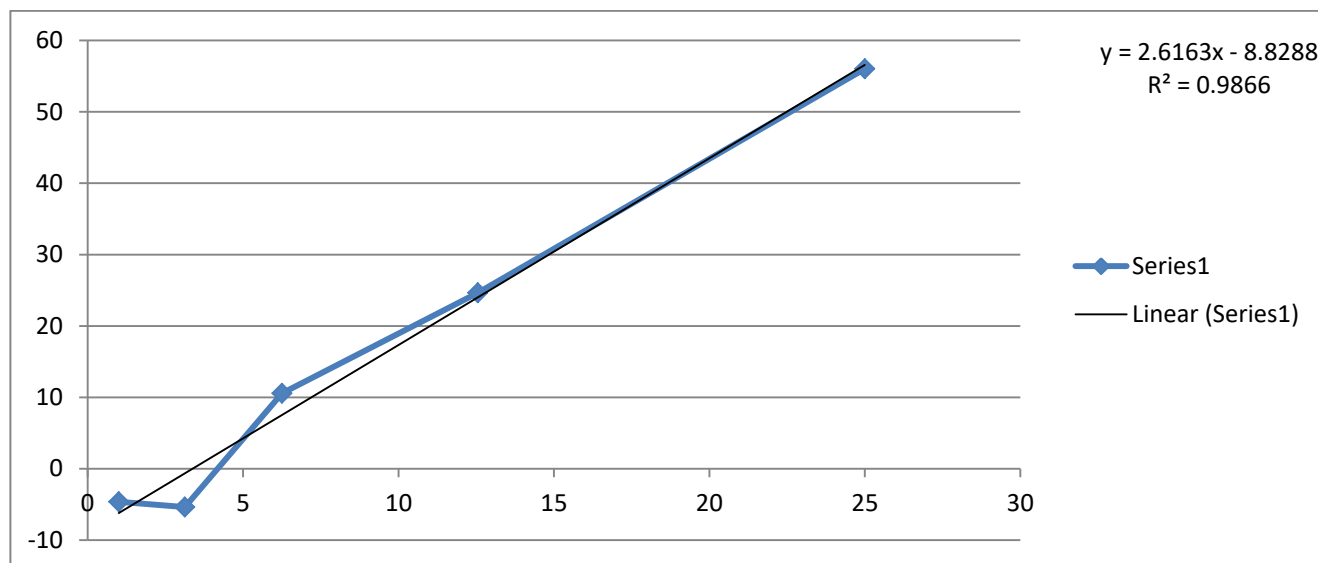

X-axis = concentration ( $\mu\text{M}$ ) of compound **3**

Y-axis = % Cell Proliferation Inhibition

$\text{IC}_{50} = 22.485 \mu\text{M}$

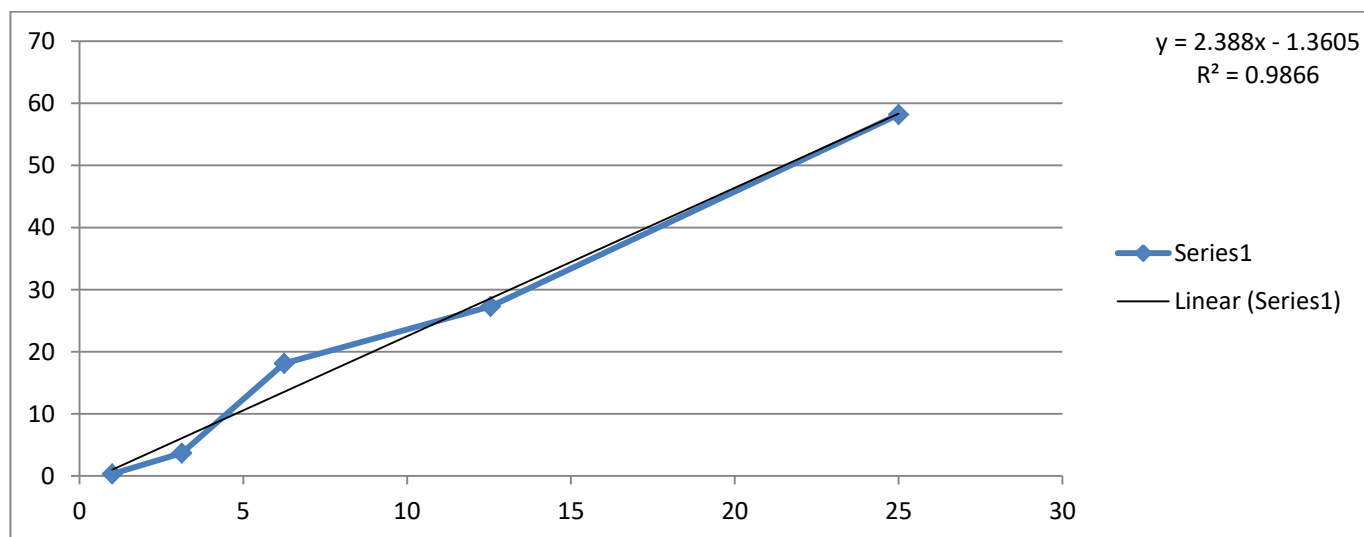

X-axis = concentration ( $\mu\text{M}$ ) of compound **3**

Y-axis = % Cell Proliferation Inhibition

$\text{IC}_{50} = 21.508 \mu\text{M}$

3. The curves that we used to calculate the IC<sub>50</sub> value for compound **3** against LNCaP

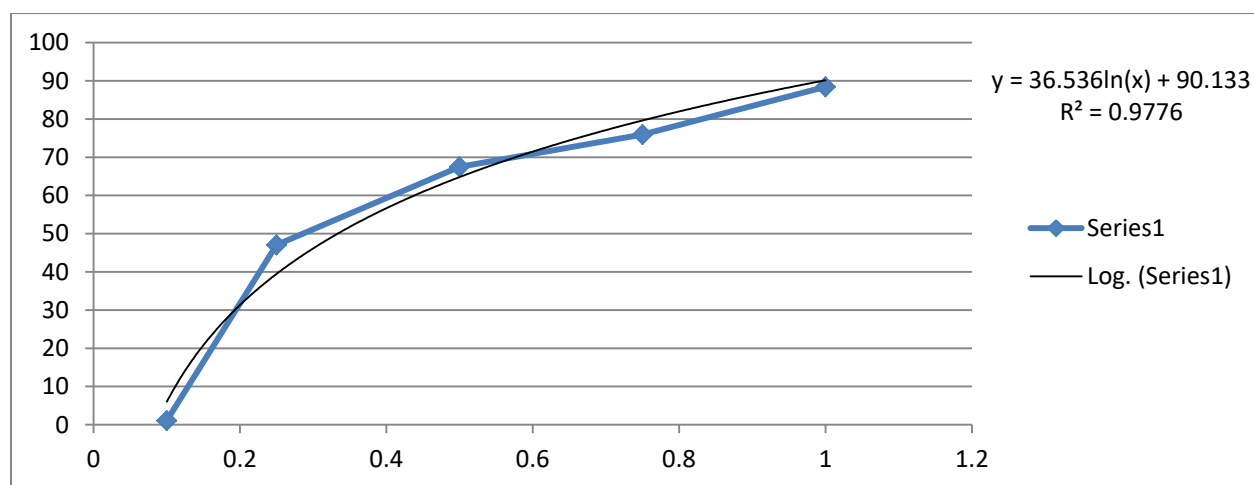

X-axis = concentration (μM) of compound **3**

Y-axis = % Cell Proliferation Inhibition

IC<sub>50</sub> = 0.333 μM

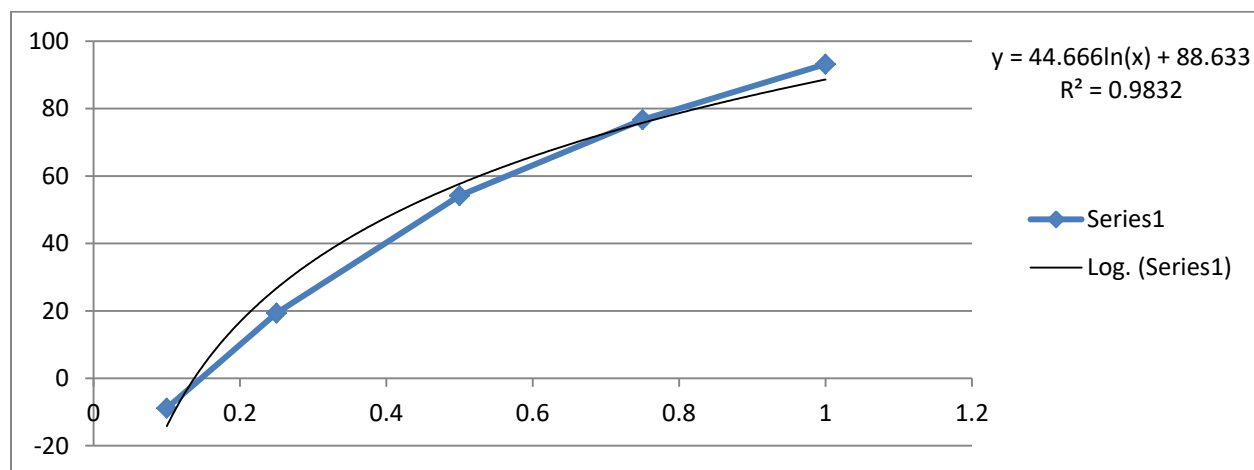

X-axis = concentration (μM) of compound **3**

Y-axis = % Cell Proliferation Inhibition

IC<sub>50</sub> = 0.421 μM



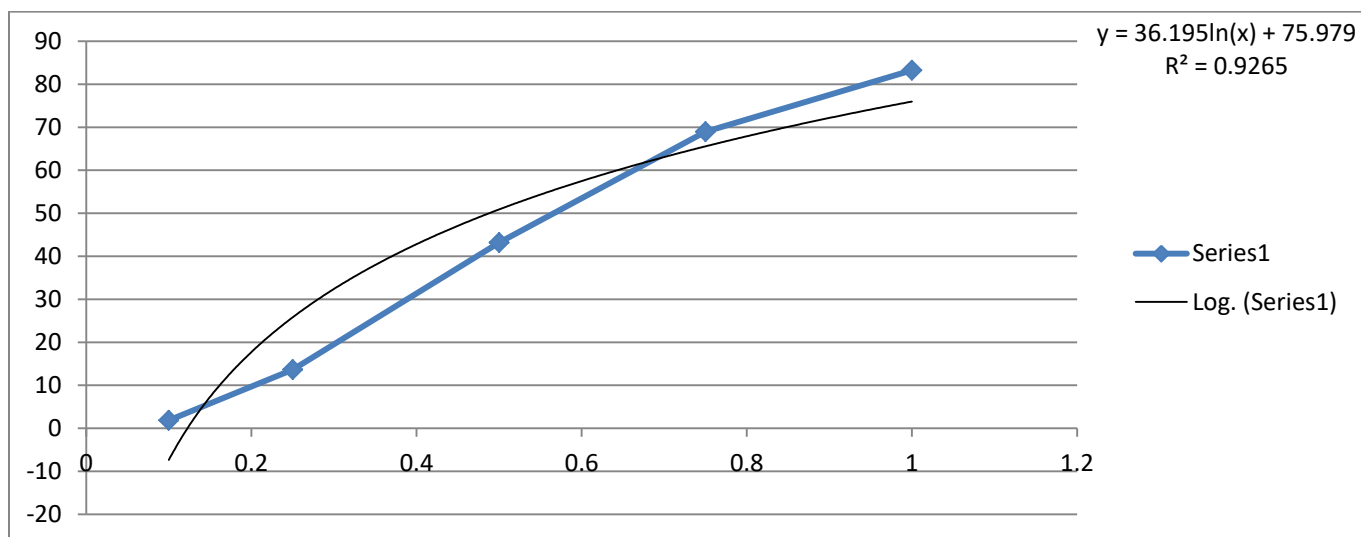

X-axis = concentration ( $\mu\text{M}$ ) of compound **3**

Y-axis = % Cell Proliferation Inhibition

$\text{IC}_{50} = 0.488 \mu\text{M}$

4. The curves that we used to calculate the  $\text{IC}_{50}$  value for compound **4** against PC-3

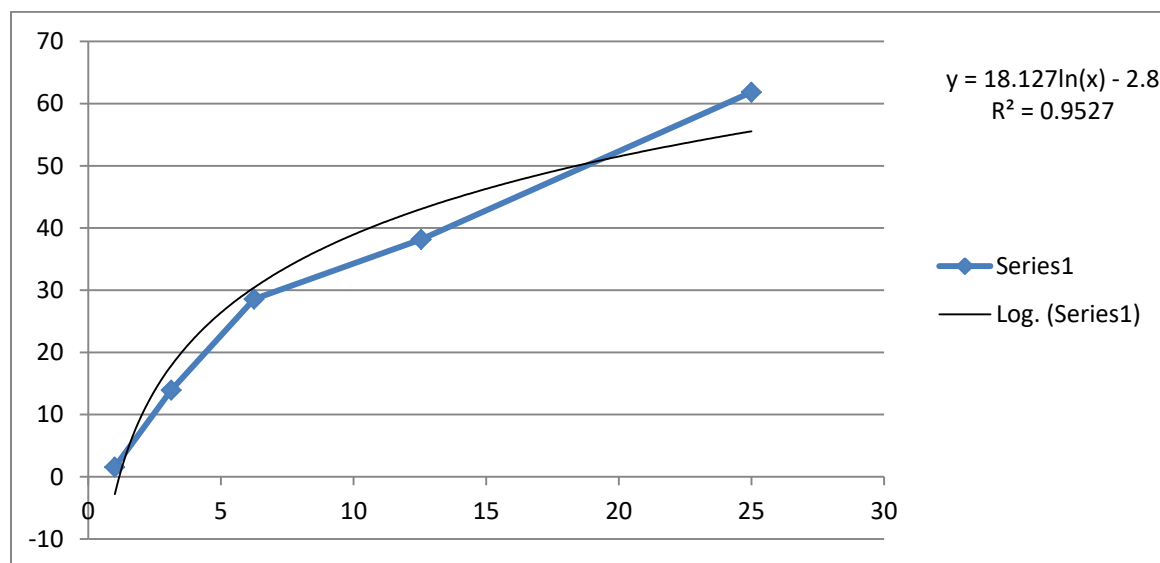

X-axis = concentration ( $\mu\text{M}$ ) of compound **4**

Y-axis = % Cell Proliferation Inhibition

$\text{IC}_{50} = 18.408 \mu\text{M}$

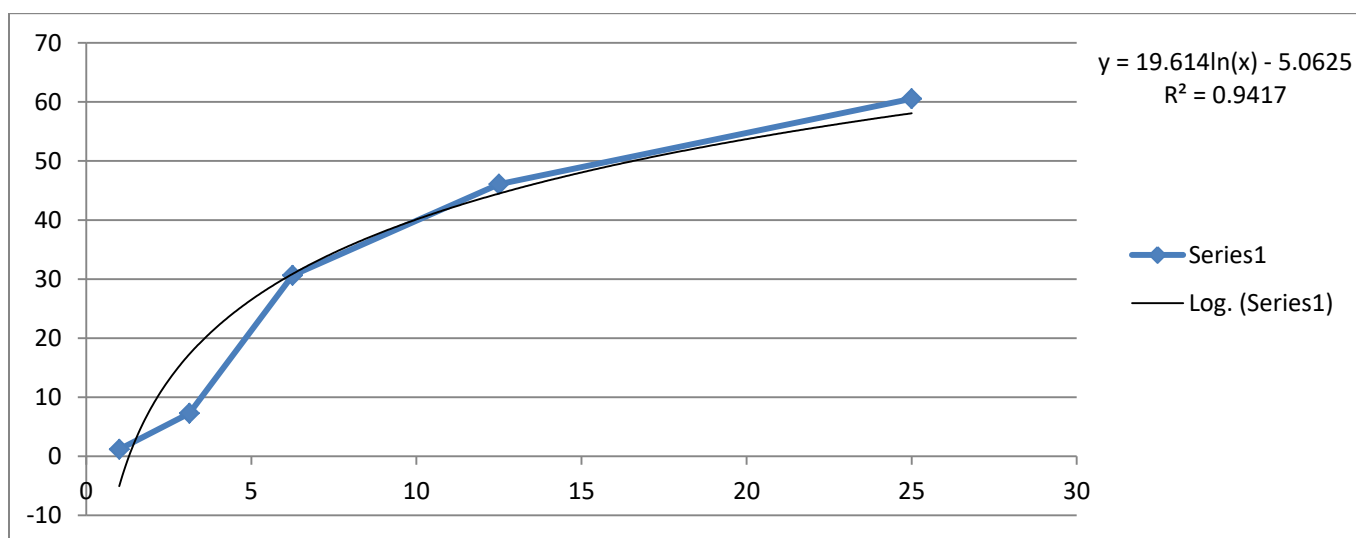

X-axis = concentration (μM) of compound 4

Y-axis = % Cell Proliferation Inhibition

IC<sub>50</sub> = 16.565 μM

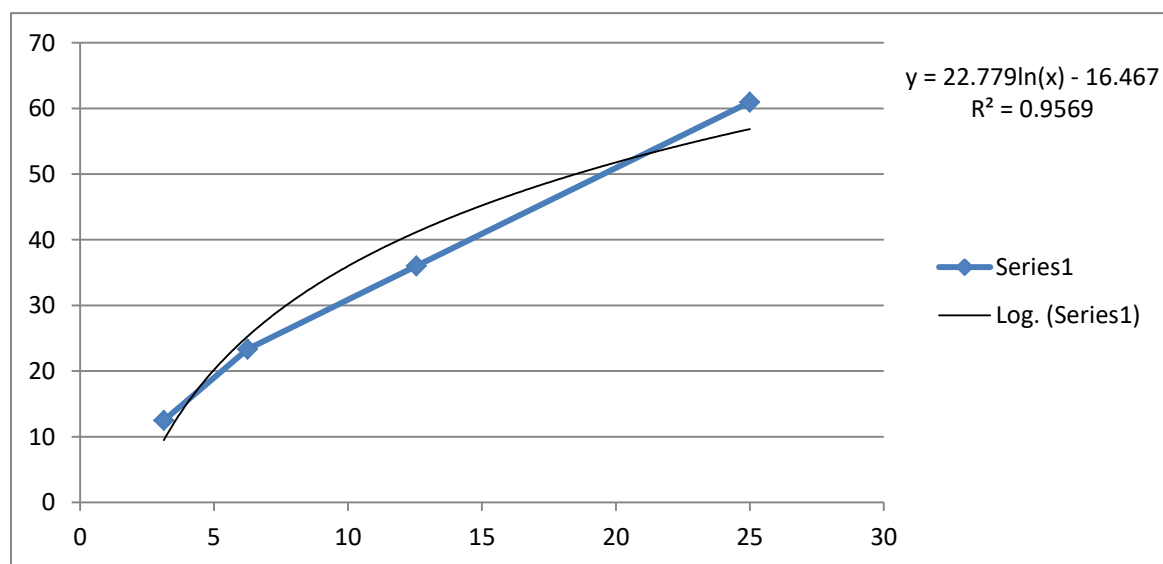

X-axis = concentration (μM) of compound 4

Y-axis = % Cell Proliferation Inhibition

IC<sub>50</sub> = 18.5025 μM

5. The curves that we used to calculate the IC<sub>50</sub> value for compound **4** against DU145

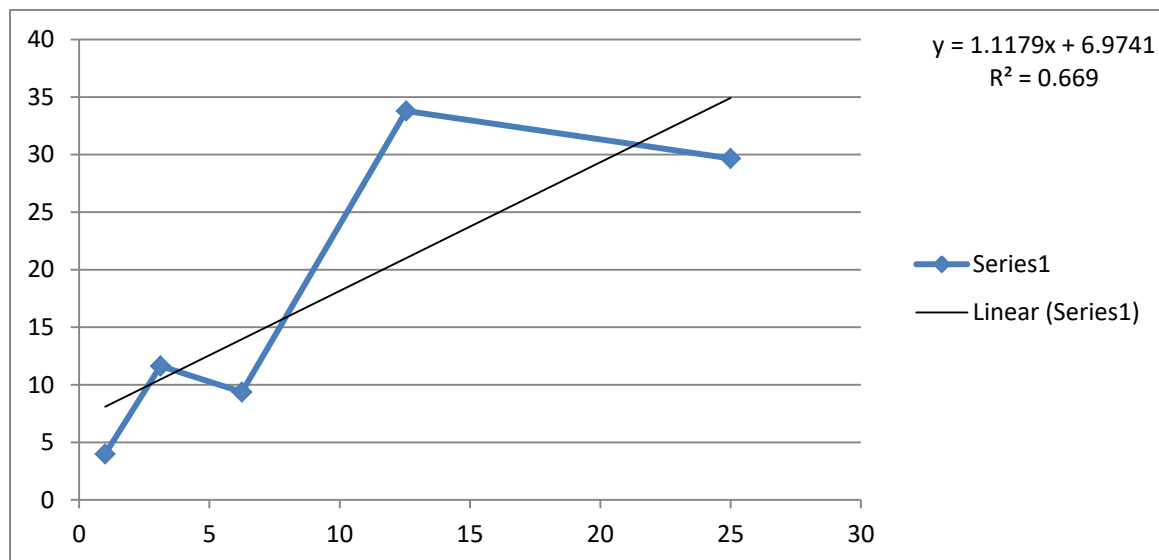

X-axis = concentration (μM) of compound **4**

Y-axis = % Cell Proliferation Inhibition

IC<sub>50</sub> > 25 μM

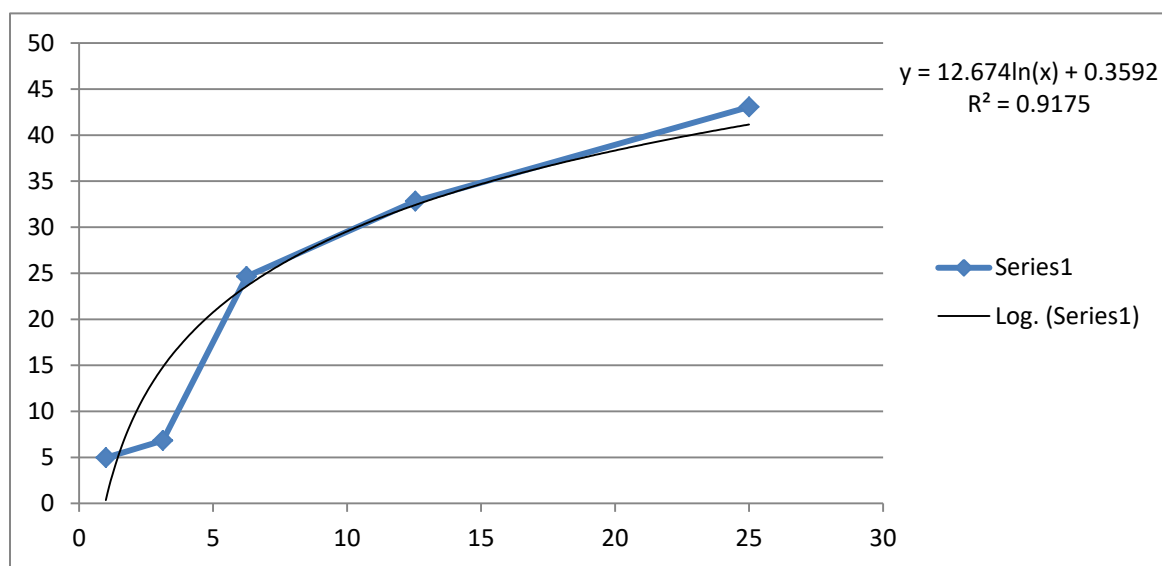

X-axis = concentration (μM) of compound **4**

Y-axis = % Cell Proliferation Inhibition

IC<sub>50</sub> > 25 μM

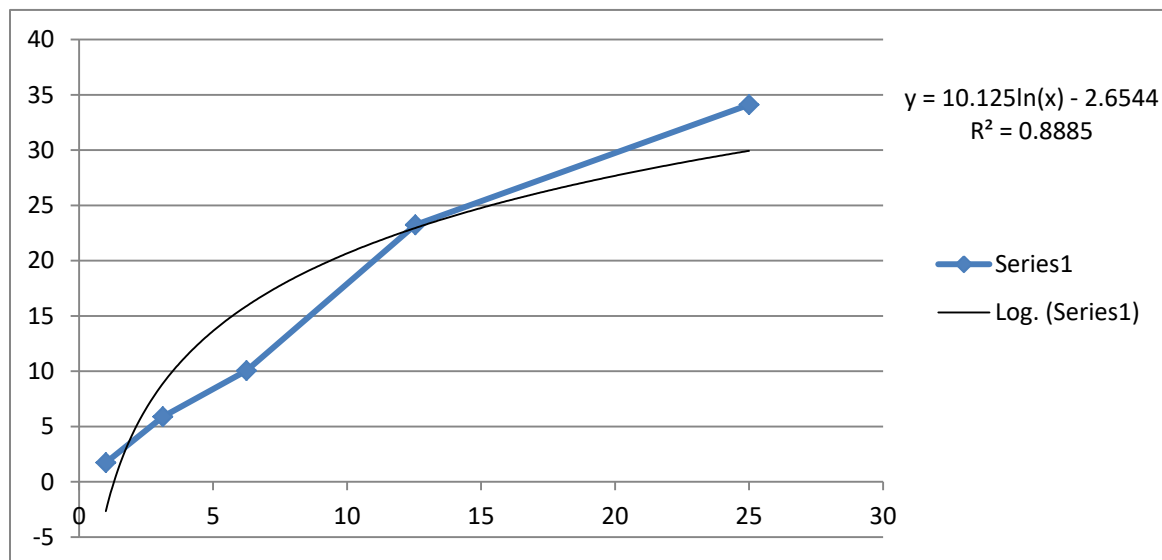

X-axis = concentration (μM) of compound **4**  
Y-axis = % Cell Proliferation Inhibition  
 $IC_{50} > 25 \mu M$

6. The curves that we used to calculate the  $IC_{50}$  value for compound **4** against LNCaP

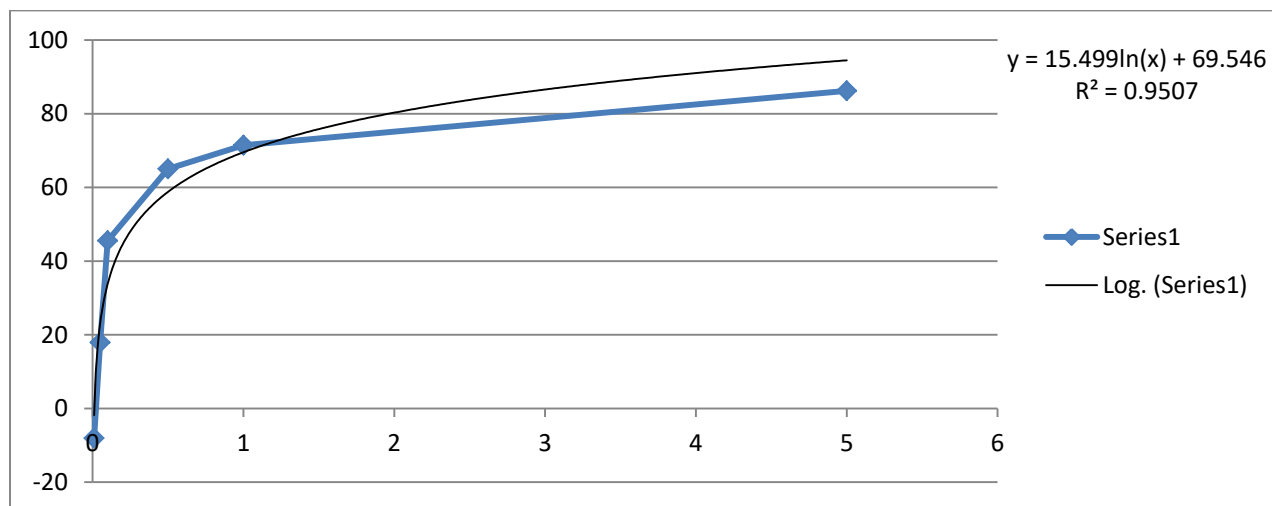

X-axis = concentration (μM) of compound **4**  
Y-axis = % Cell Proliferation Inhibition  
 $IC_{50} = 0.283 \mu M$

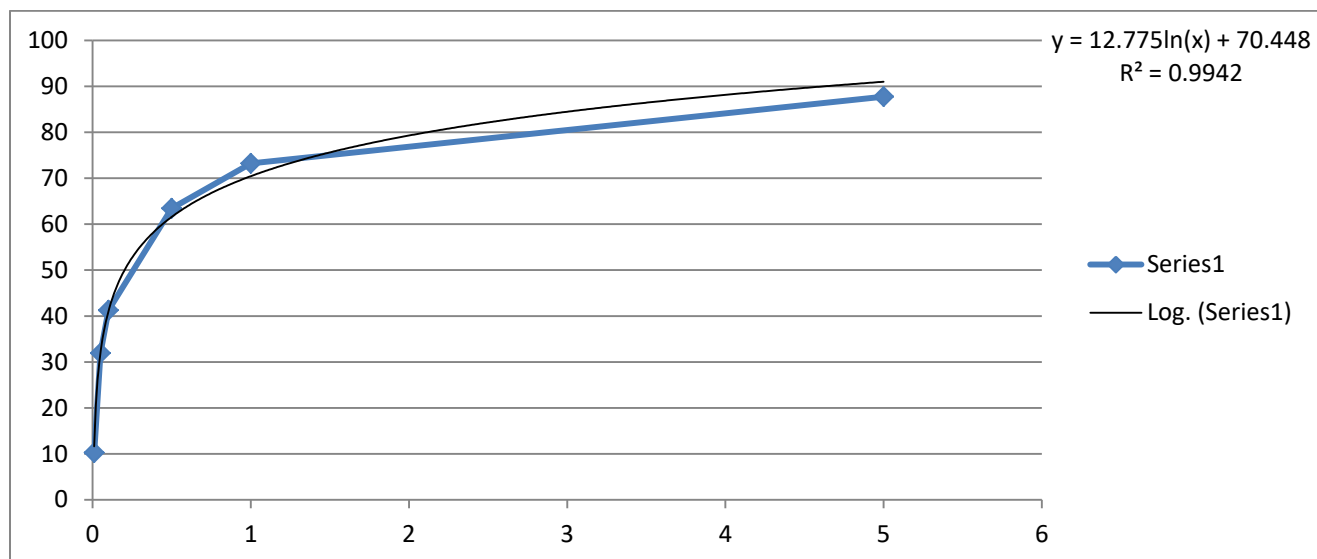

X-axis = concentration ( $\mu\text{M}$ ) of compound **4**  
Y-axis = % Cell Proliferation Inhibition  
 $\text{IC}_{50} = 0.202 \mu\text{M}$

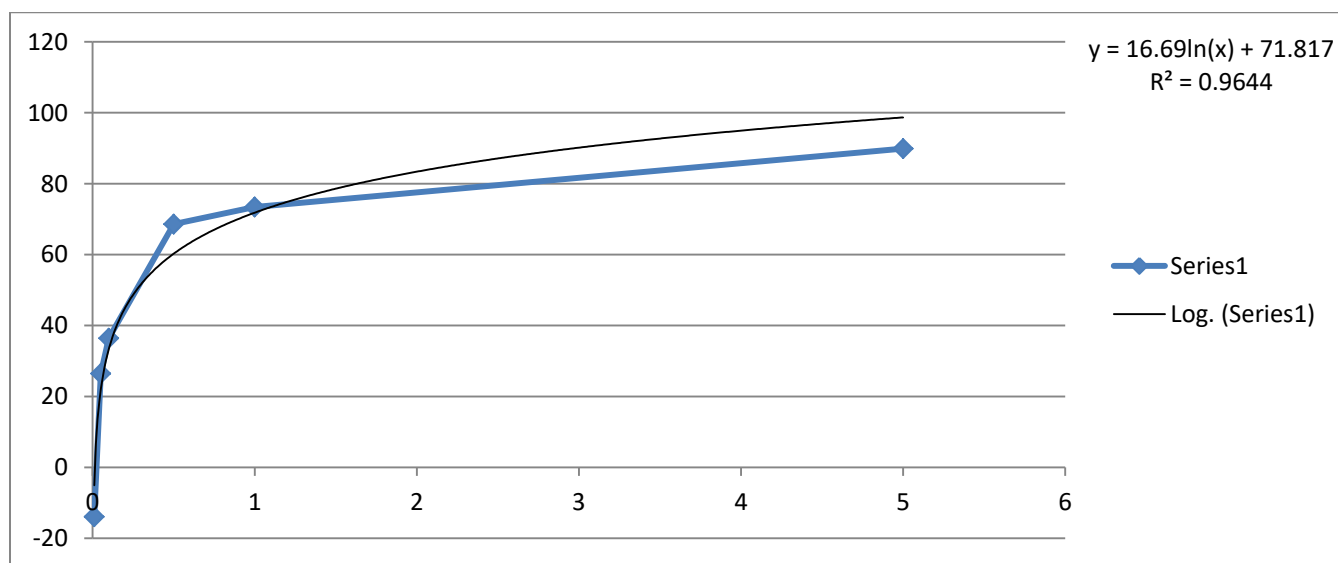

X-axis = concentration ( $\mu\text{M}$ ) of compound **4**  
Y-axis = % Cell Proliferation Inhibition  
 $\text{IC}_{50} = 0.271 \mu\text{M}$

7. The curves that we used to calculate the IC<sub>50</sub> value for compound **5** against PC-3

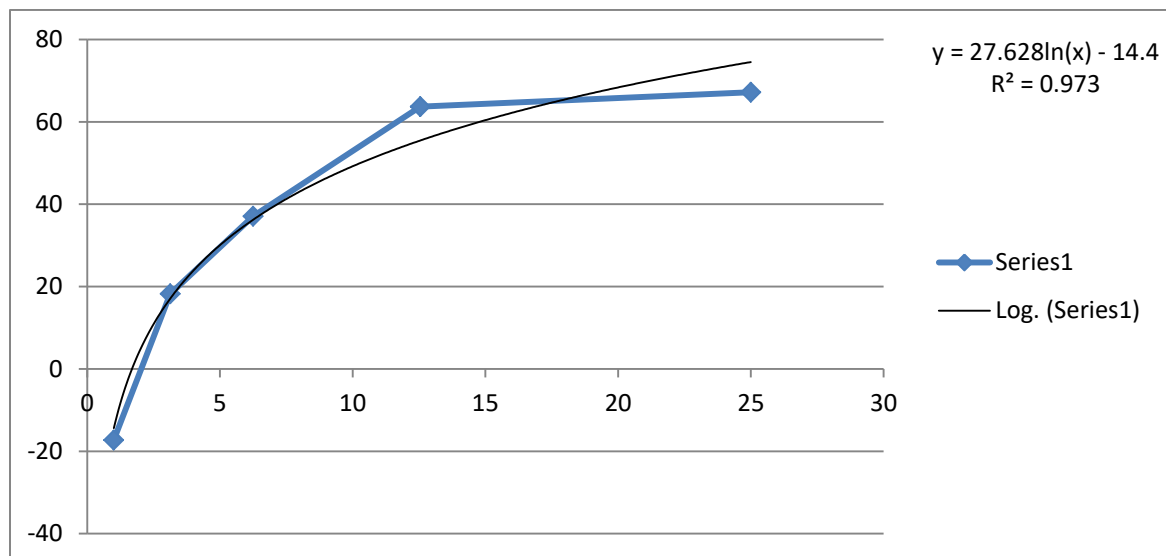

X-axis = concentration (μM) of compound **5**

Y-axis = % Cell Proliferation Inhibition

IC<sub>50</sub> = 10.288 μM

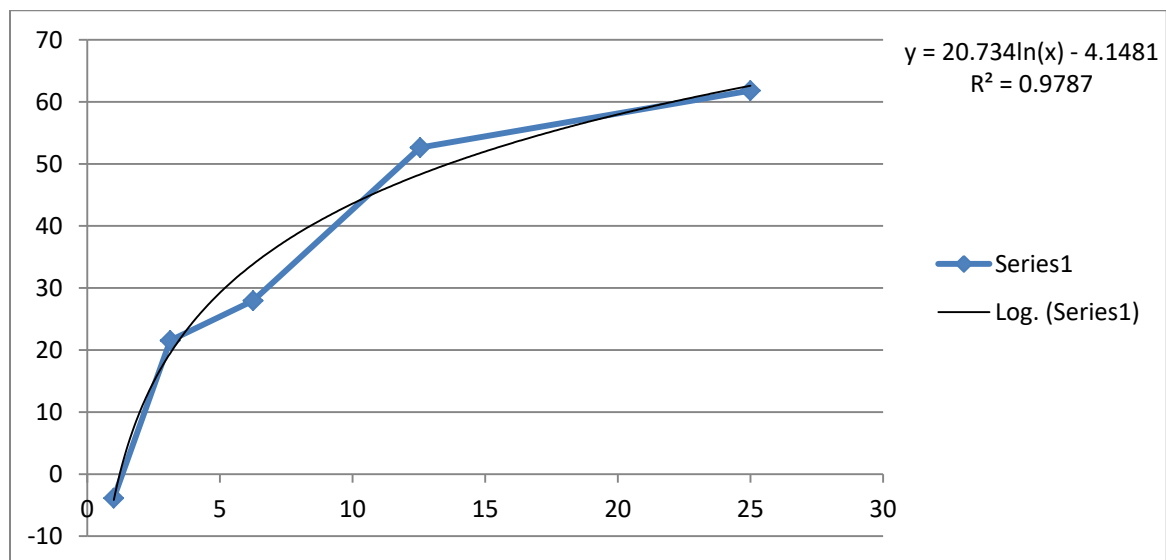

X-axis = concentration (μM) of compound **5**

Y-axis = % Cell Proliferation Inhibition

IC<sub>50</sub> = 13.620 μM

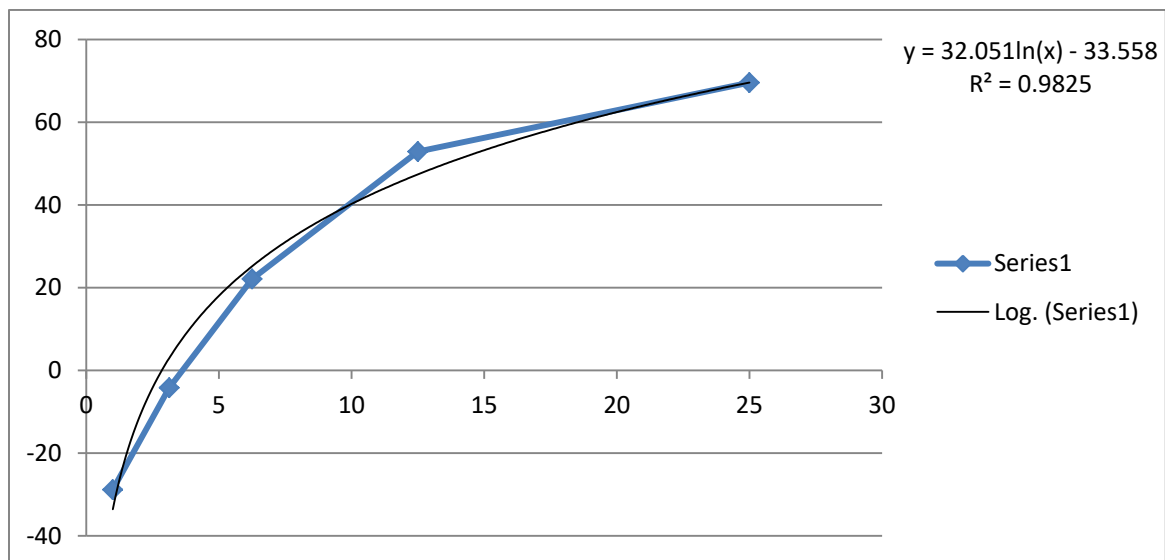

X-axis = concentration ( $\mu\text{M}$ ) of compound **5**  
Y-axis = % Cell Proliferation Inhibition  
 $\text{IC}_{50}$  = 13.575  $\mu\text{M}$

8. The curves that we used to calculate the  $\text{IC}_{50}$  value for compound **5** against DU145

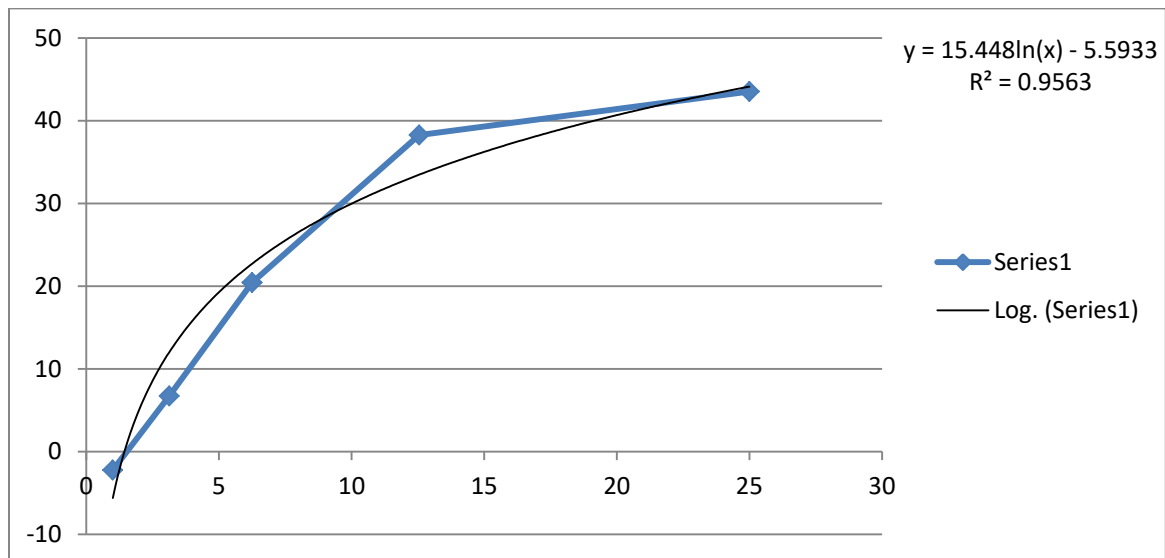

X-axis = concentration ( $\mu\text{M}$ ) of compound **5**  
Y-axis = % Cell Proliferation Inhibition  
 $\text{IC}_{50}$  > 25  $\mu\text{M}$

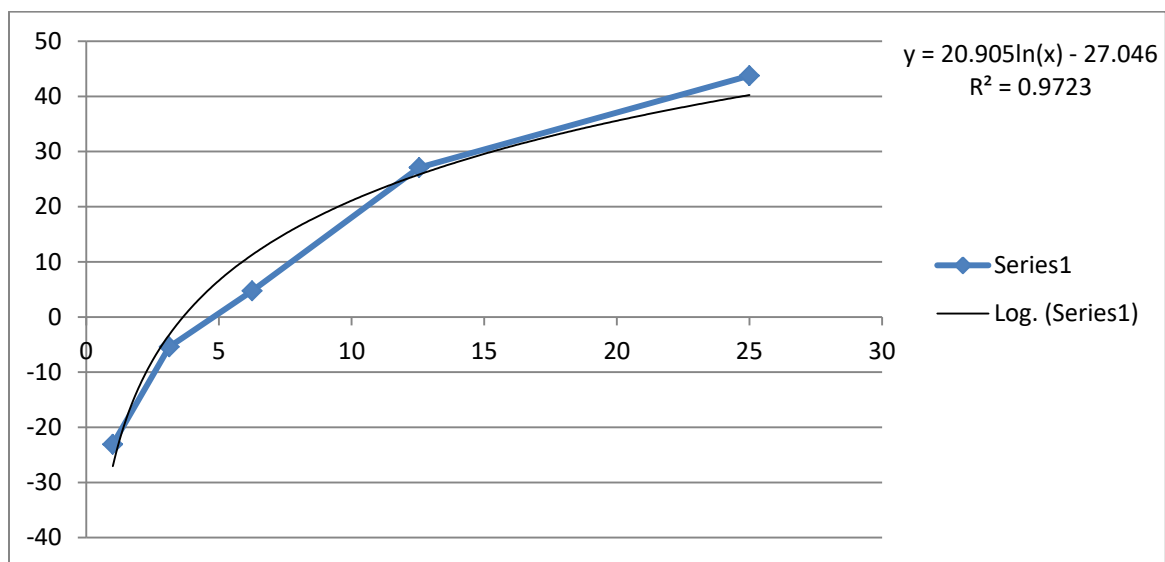

X-axis = concentration ( $\mu\text{M}$ ) of compound **5**  
Y-axis = % Cell Proliferation Inhibition  
IC<sub>50</sub> > 25  $\mu\text{M}$

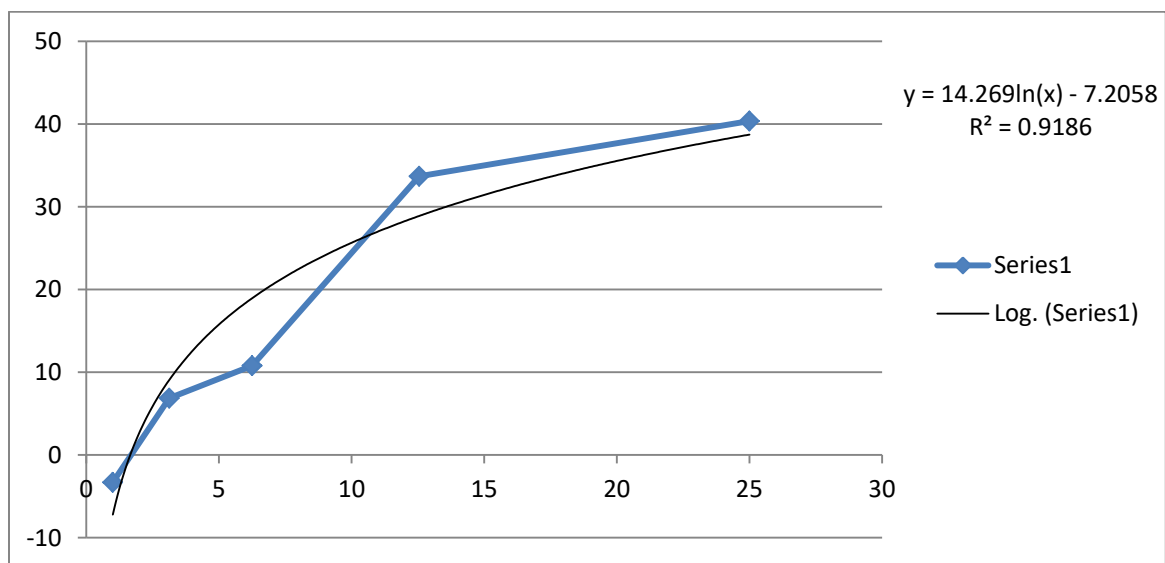

X-axis = concentration ( $\mu\text{M}$ ) of compound **5**  
Y-axis = % Cell Proliferation Inhibition  
IC<sub>50</sub> > 25  $\mu\text{M}$



9. The curves that we used to calculate the IC<sub>50</sub> value for compound **5** against LNCaP

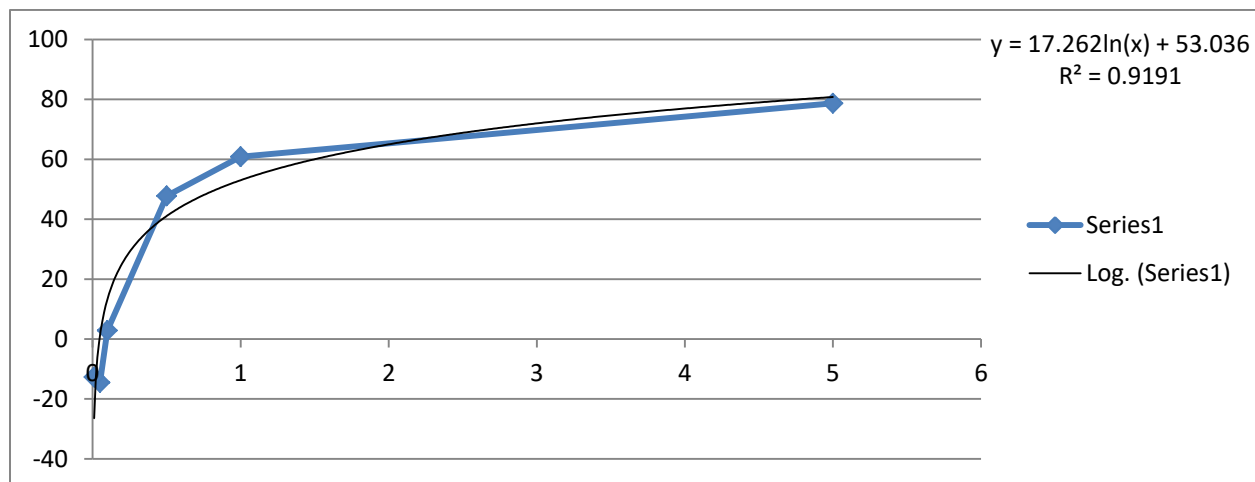

X-axis = concentration (μM) of compound **5**

Y-axis = % Cell Proliferation Inhibition

IC<sub>50</sub> = 0.839 μM

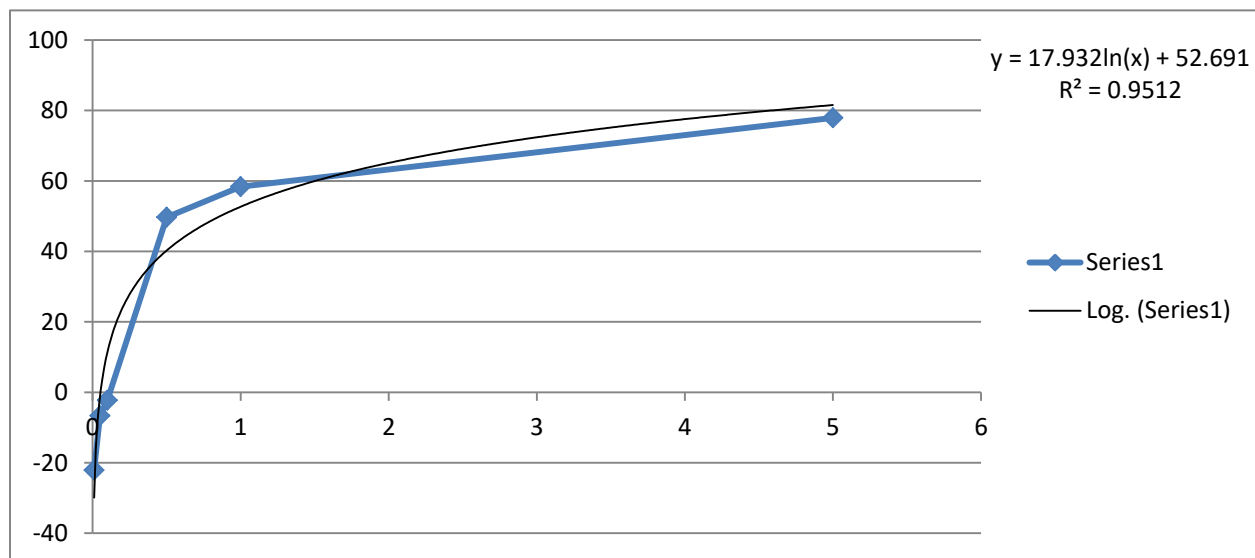

X-axis = concentration (μM) of compound **5**

Y-axis = % Cell Proliferation Inhibition

IC<sub>50</sub> = 0.861 μM

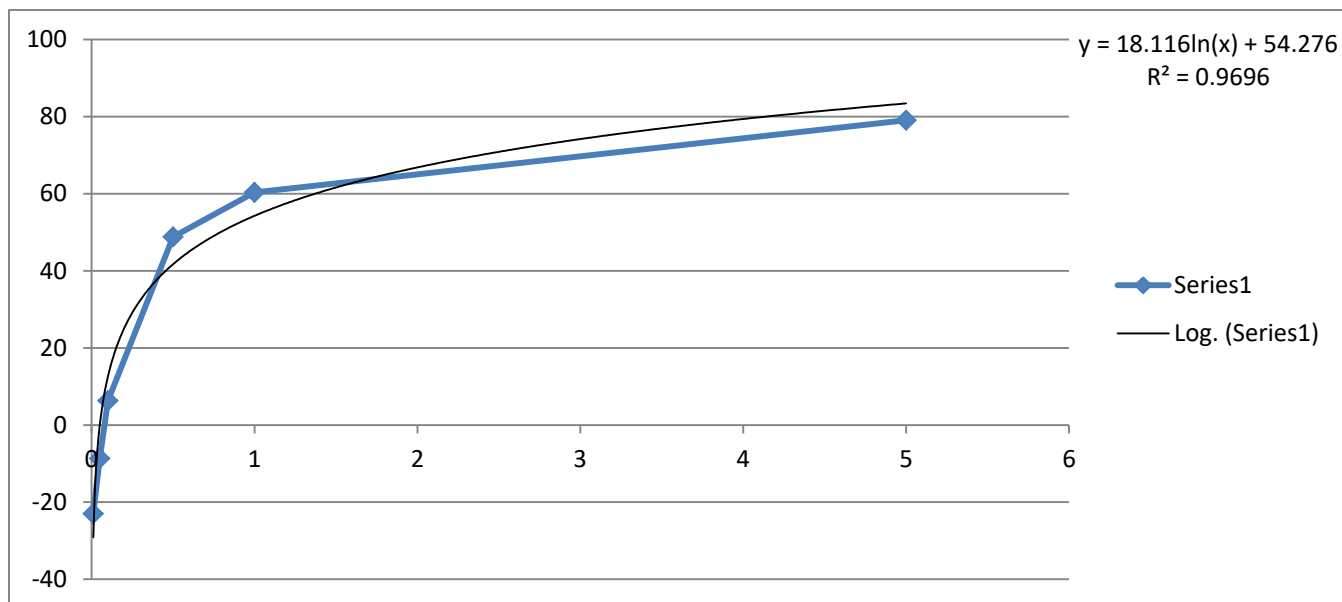

X-axis = concentration ( $\mu\text{M}$ ) of compound **5**  
Y-axis = % Cell Proliferation Inhibition  
 $\text{IC}_{50} = 0.790 \mu\text{M}$

10. The curves that we used to calculate the  $\text{IC}_{50}$  value for compound **6** against PC-3

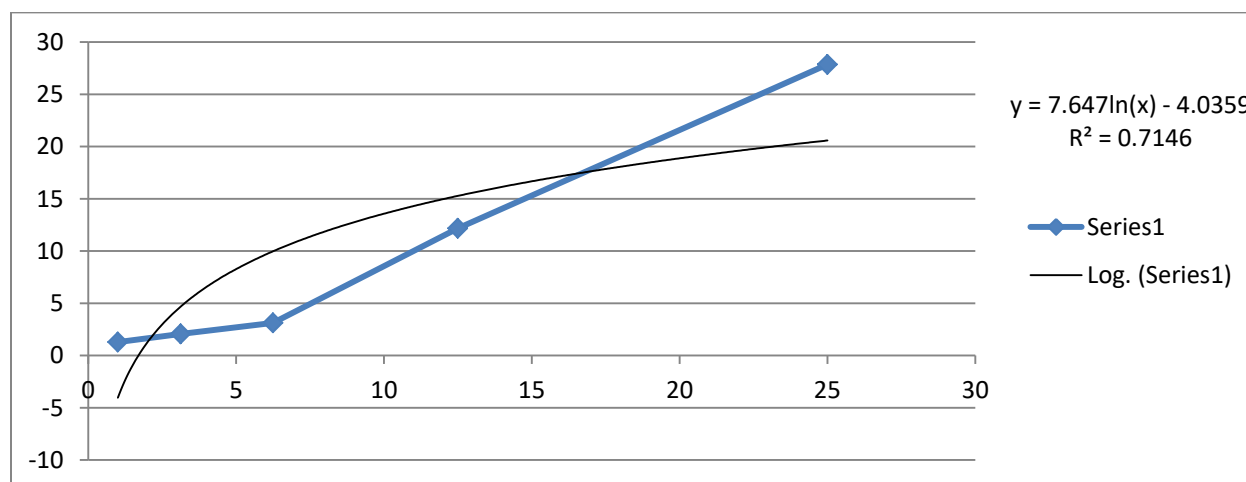

X-axis = concentration ( $\mu\text{M}$ ) of compound **6**  
Y-axis = % Cell Proliferation Inhibition  
 $\text{IC}_{50} > 25 \mu\text{M}$

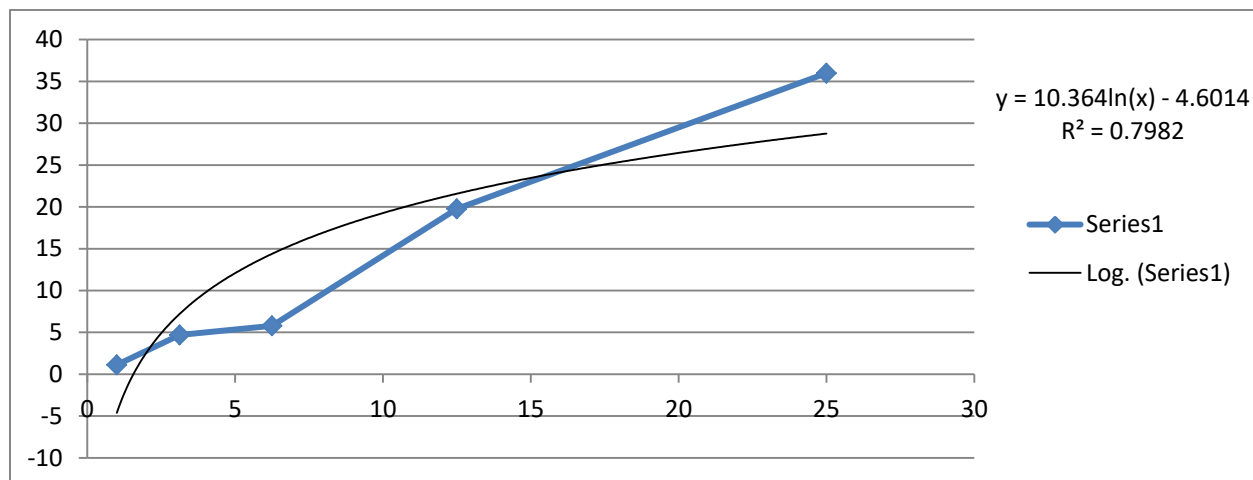

X-axis = concentration ( $\mu\text{M}$ ) of compound **6**  
Y-axis = % Cell Proliferation Inhibition  
IC<sub>50</sub> > 25  $\mu\text{M}$

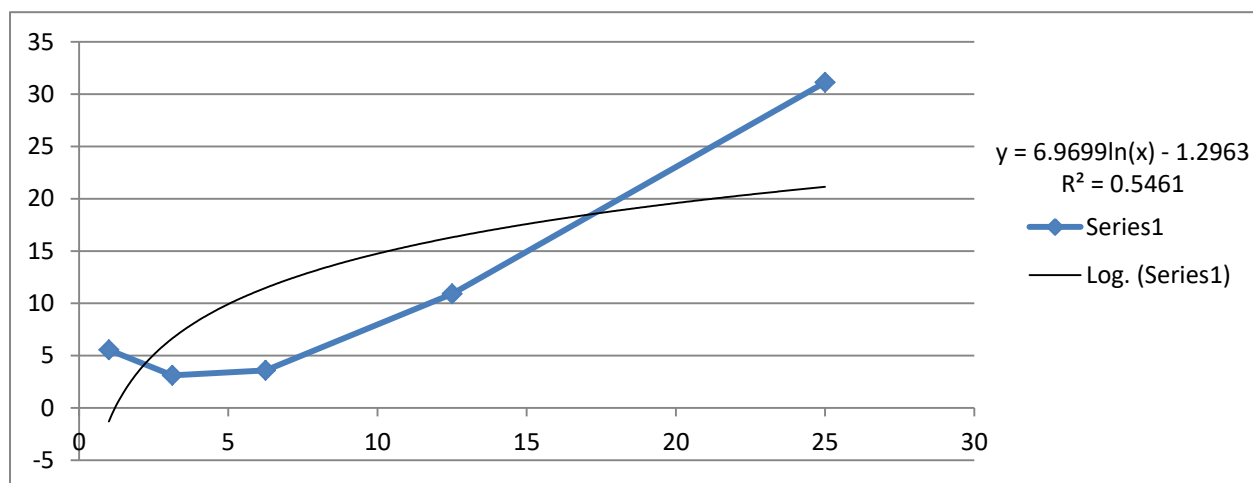

X-axis = concentration ( $\mu\text{M}$ ) of compound **6**  
Y-axis = % Cell Proliferation Inhibition  
IC<sub>50</sub> > 25  $\mu\text{M}$

11. The curves that we used to calculate the IC<sub>50</sub> value for compound **6** against DU145

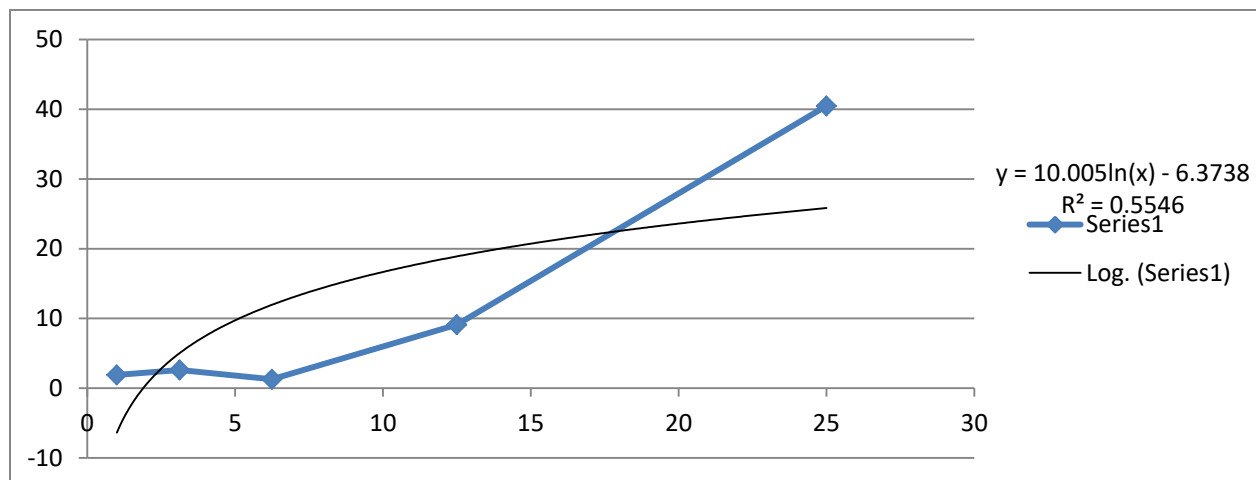

X-axis = concentration (μM) of compound **6**

Y-axis = % Cell Proliferation Inhibition

IC<sub>50</sub> > 25 μM

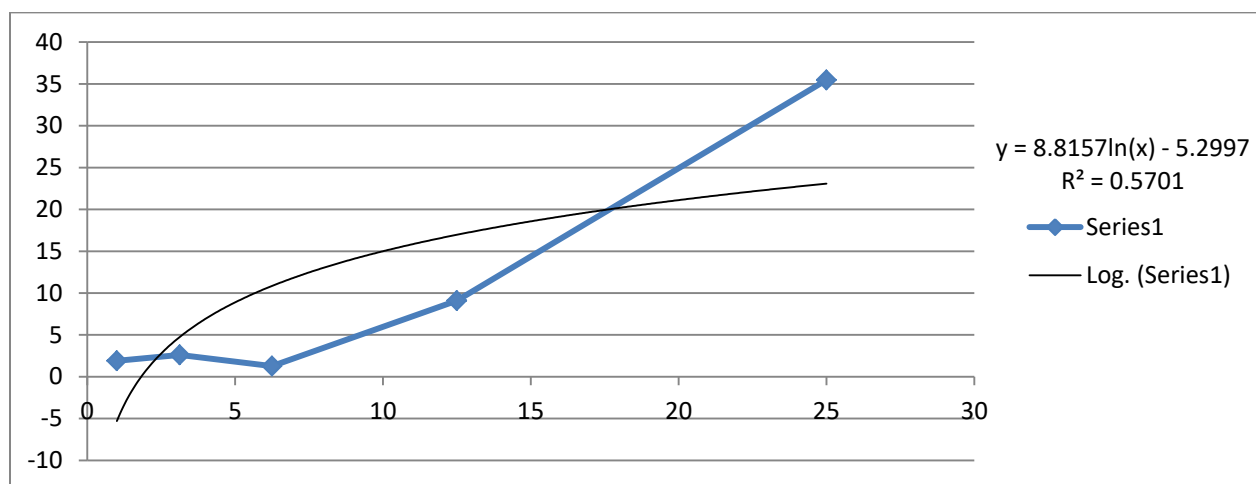

X-axis = concentration (μM) of compound **6**

Y-axis = % Cell Proliferation Inhibition

IC<sub>50</sub> > 25 μM

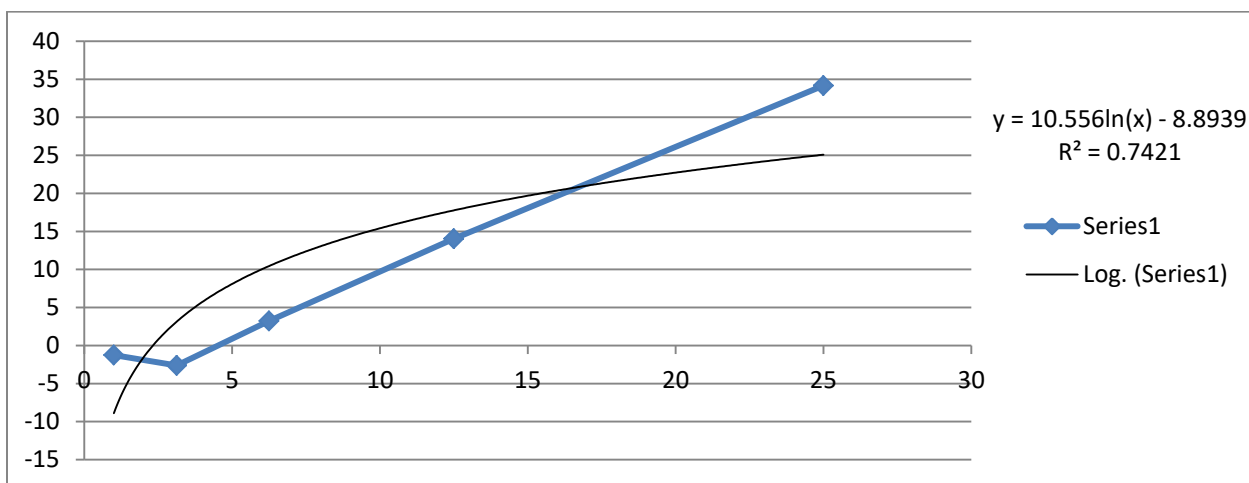

X-axis = concentration ( $\mu\text{M}$ ) of compound **6**

Y-axis = % Cell Proliferation Inhibition

$\text{IC}_{50} > 25 \mu\text{M}$

12. The curves that we used to calculate the  $\text{IC}_{50}$  value for compound **6** against LNCaP

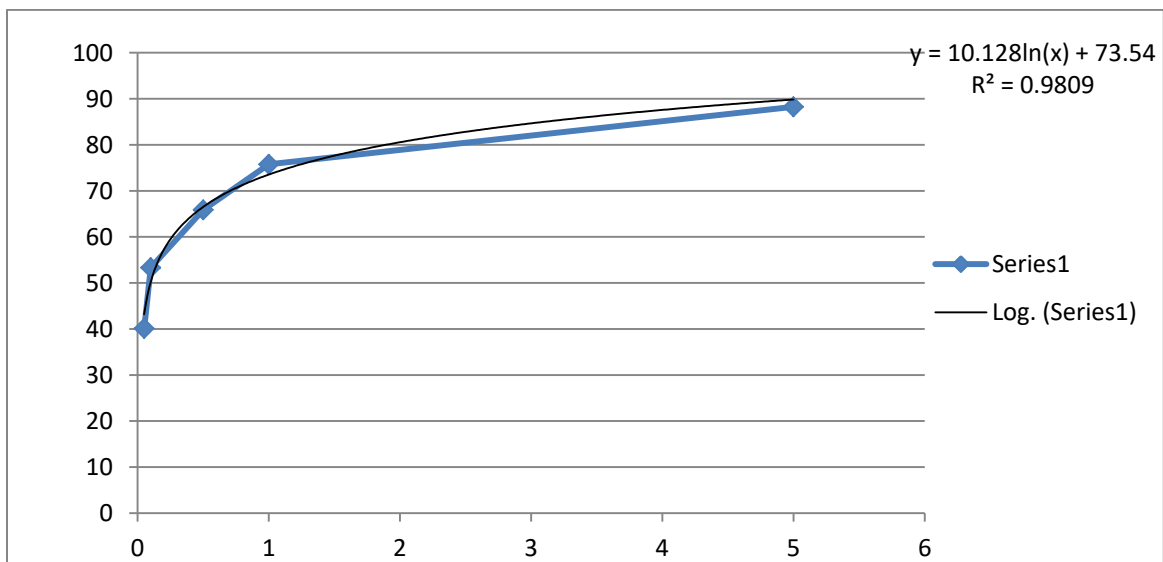

X-axis = concentration ( $\mu\text{M}$ ) of compound **6**

Y-axis = % Cell Proliferation Inhibition

$\text{IC}_{50} = 0.0979 \mu\text{M}$

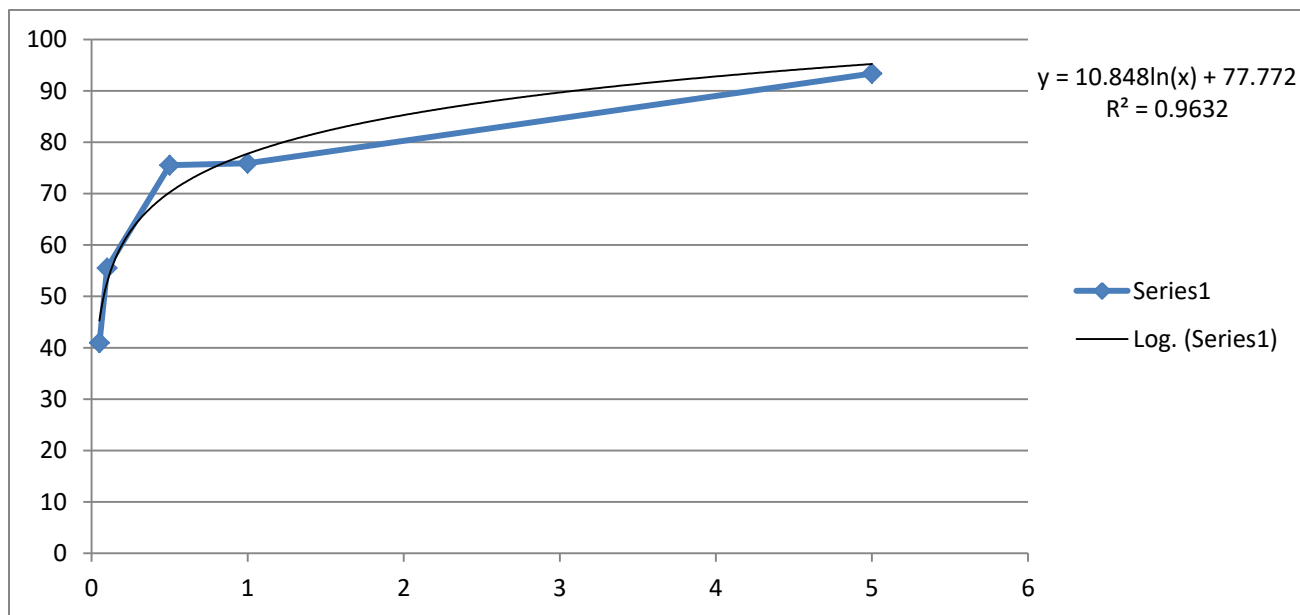

X-axis = concentration (μM) of compound 6

Y-axis = % Cell Proliferation Inhibition

IC<sub>50</sub> = 0.0773 μM

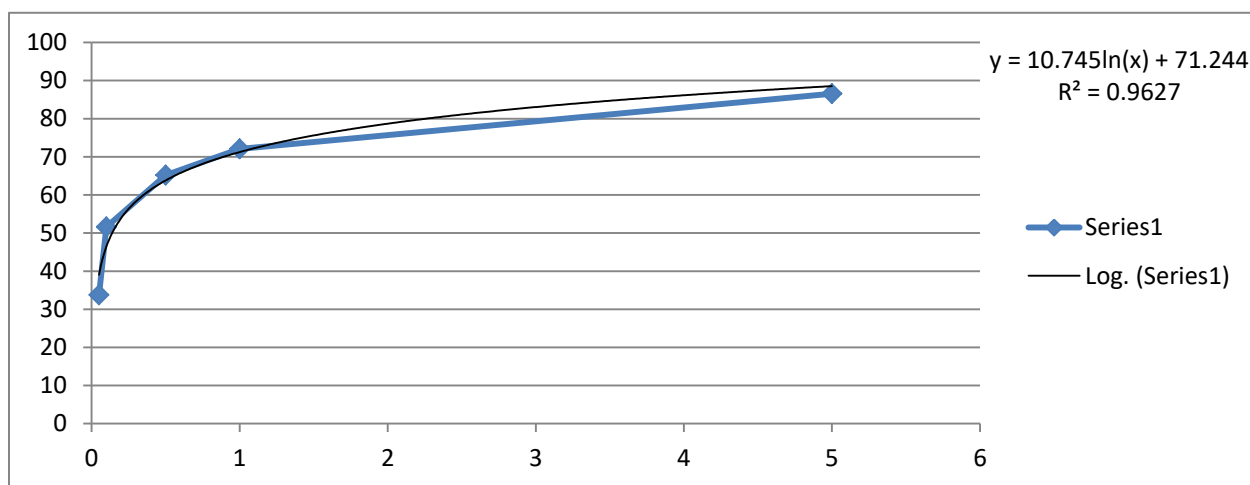

X-axis = concentration (μM) of compound 6

Y-axis = % Cell Proliferation Inhibition

IC<sub>50</sub> = 0.1385 μM

13. The curves that we used to calculate the IC<sub>50</sub> value for compound 7 against PC-3

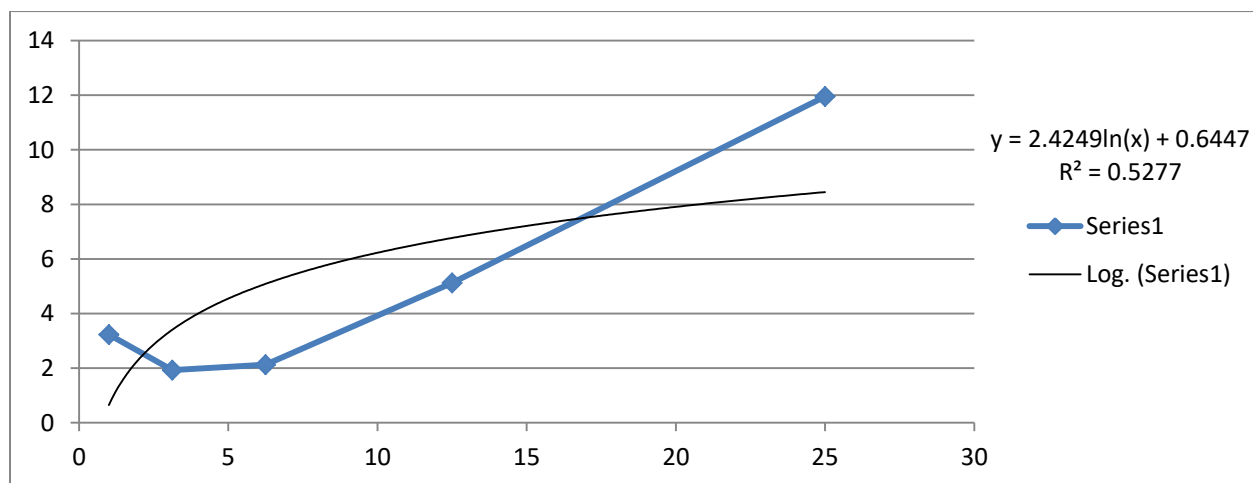

X-axis = concentration (μM) of compound 7

Y-axis = % Cell Proliferation Inhibition

IC<sub>50</sub> > 25 μM

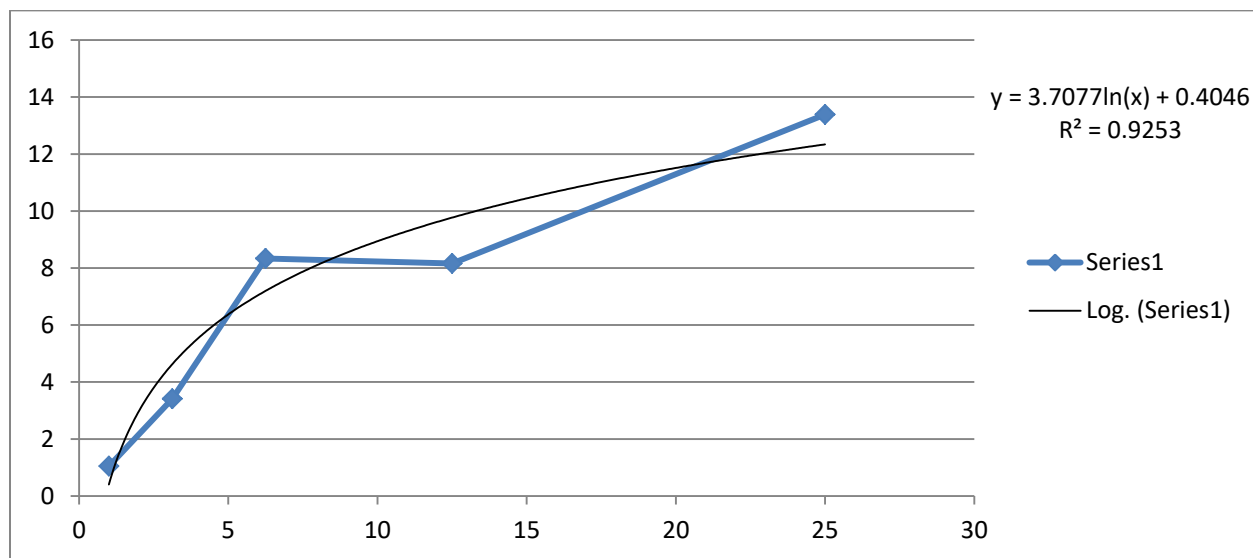

X-axis = concentration (μM) of compound 7

Y-axis = % Cell Proliferation Inhibition

IC<sub>50</sub> > 25 μM

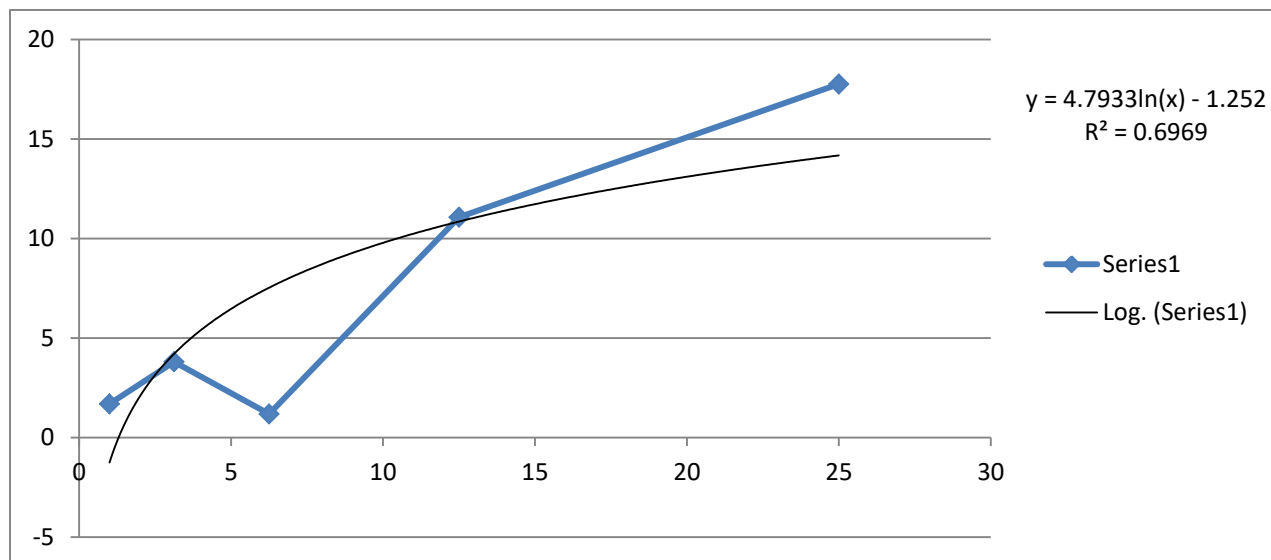

X-axis = concentration ( $\mu\text{M}$ ) of compound 7  
Y-axis = % Cell Proliferation Inhibition  
 $\text{IC}_{50} > 25 \mu\text{M}$

14. The curves that we used to calculate the  $\text{IC}_{50}$  value for compound 7 against DU145

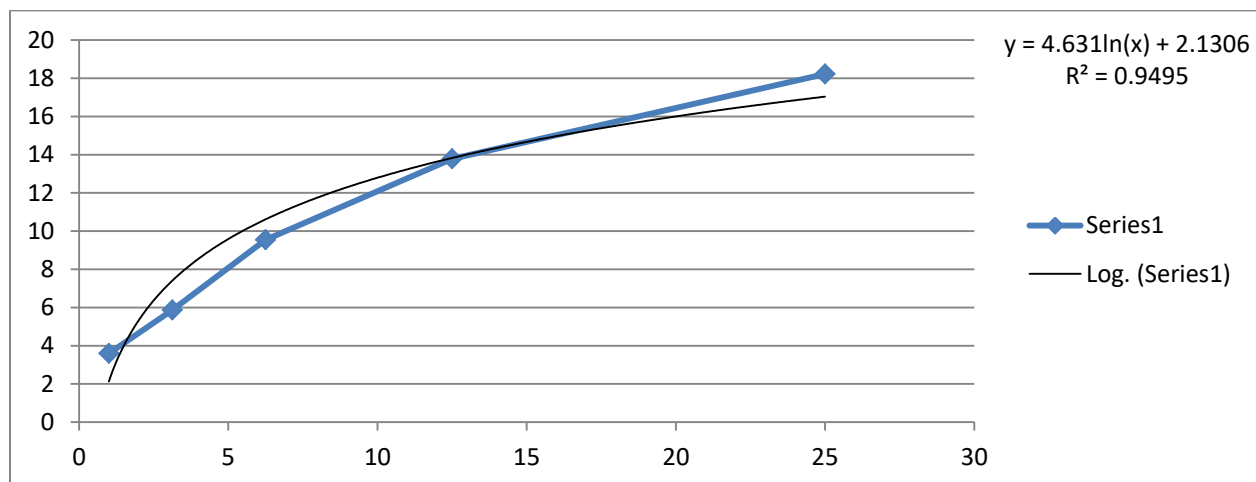

X-axis = concentration ( $\mu\text{M}$ ) of compound 7  
Y-axis = % Cell Proliferation Inhibition  
 $\text{IC}_{50} > 25 \mu\text{M}$



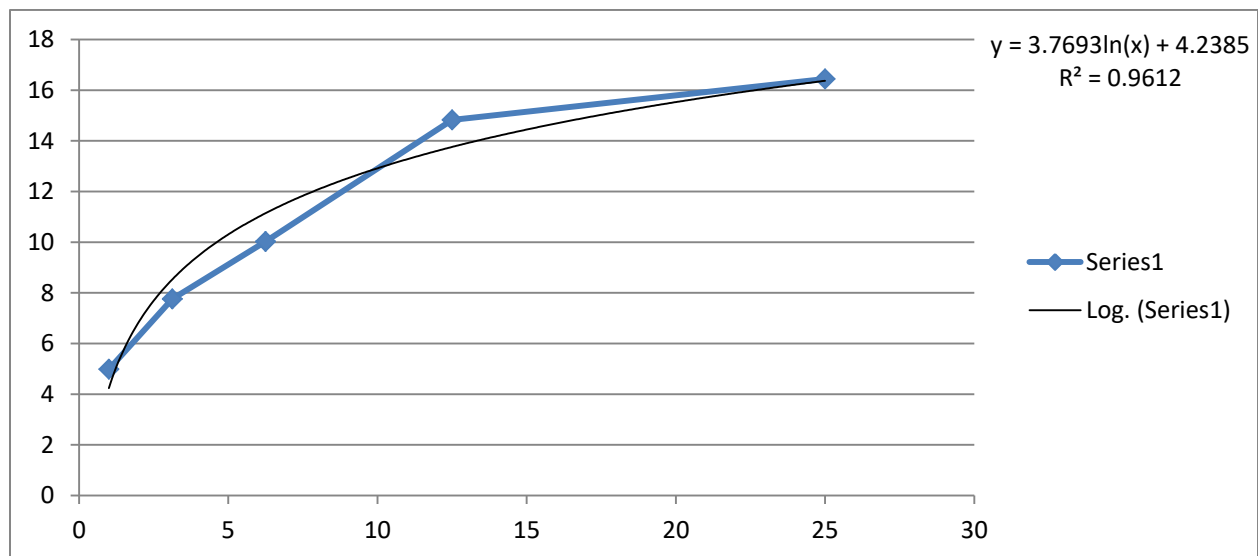

X-axis = concentration (μM) of compound 7  
Y-axis = % Cell Proliferation Inhibition  
IC<sub>50</sub> > 25 μM

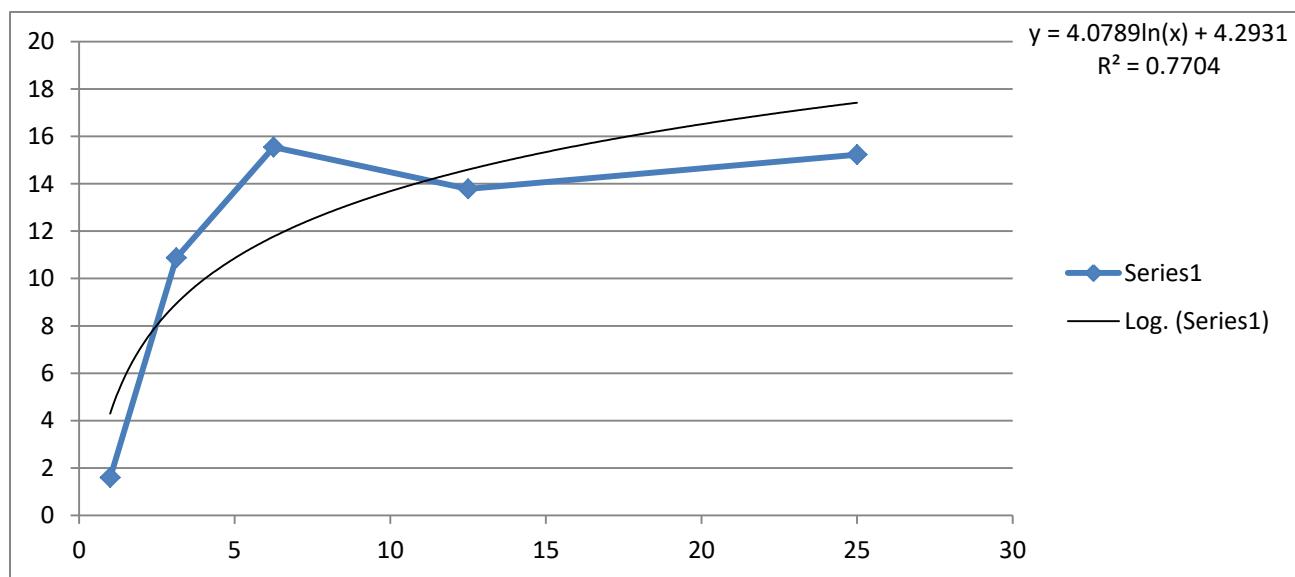

X-axis = concentration (μM) of compound 7  
Y-axis = % Cell Proliferation Inhibition  
IC<sub>50</sub> > 25 μM

15. The curves that we used to calculate the IC<sub>50</sub> value for compound 7 against LNCaP

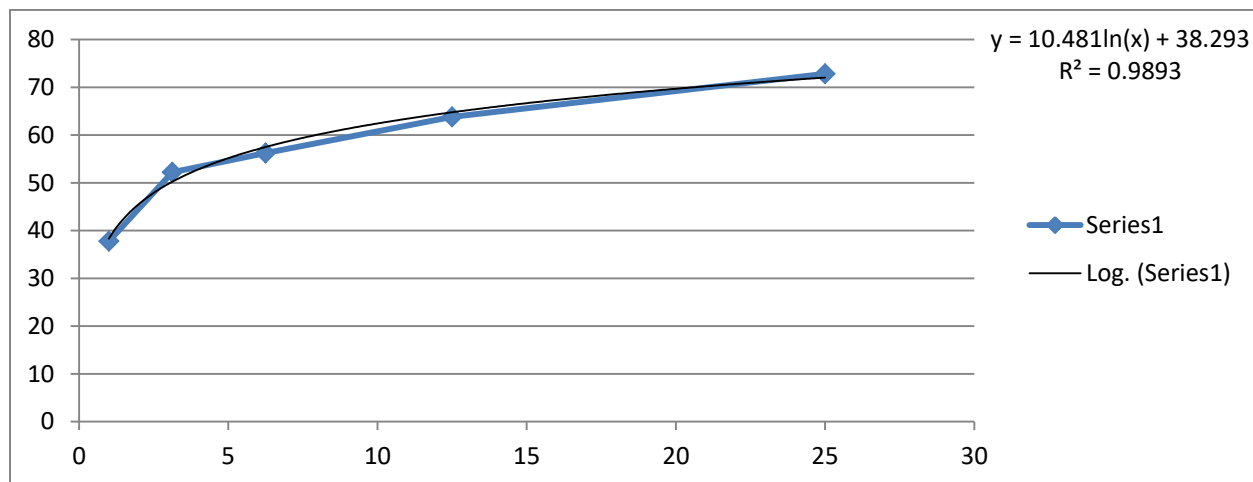

X-axis = concentration (μM) of compound 7

Y-axis = % Cell Proliferation Inhibition

IC<sub>50</sub> = 3.055 μM

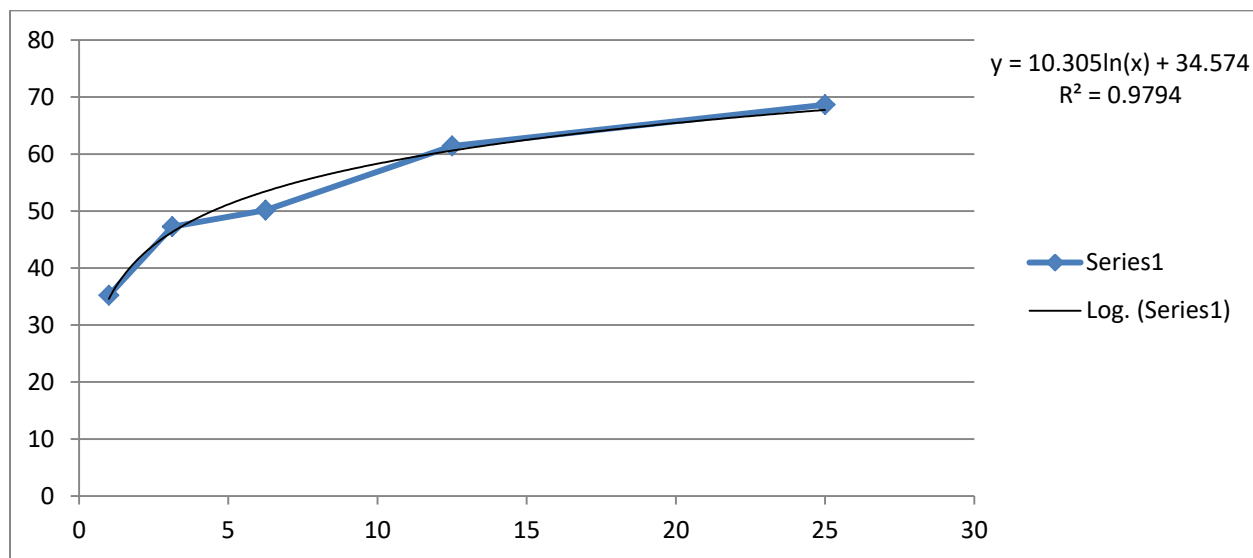

X-axis = concentration (μM) of compound 7

Y-axis = % Cell Proliferation Inhibition

IC<sub>50</sub> = 4.468 μM

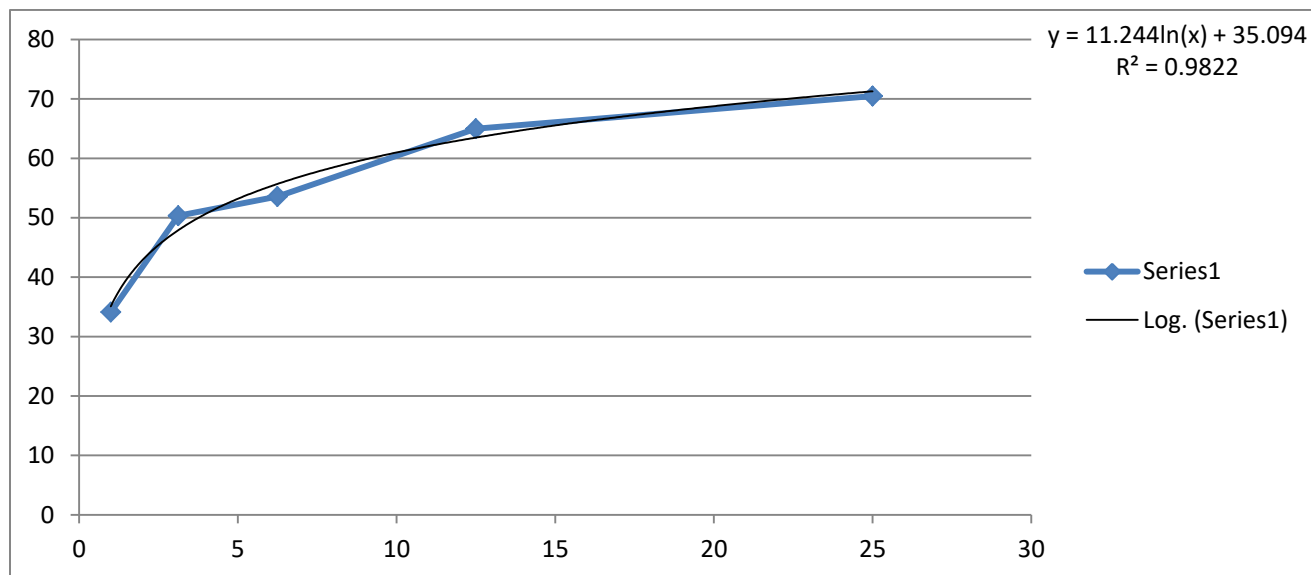

X-axis = concentration (μM) of compound 7

Y-axis = % Cell Proliferation Inhibition

IC<sub>50</sub> = 3.765 μM

16. The curves that we used to calculate the IC<sub>50</sub> value for compound 8 against PC-3

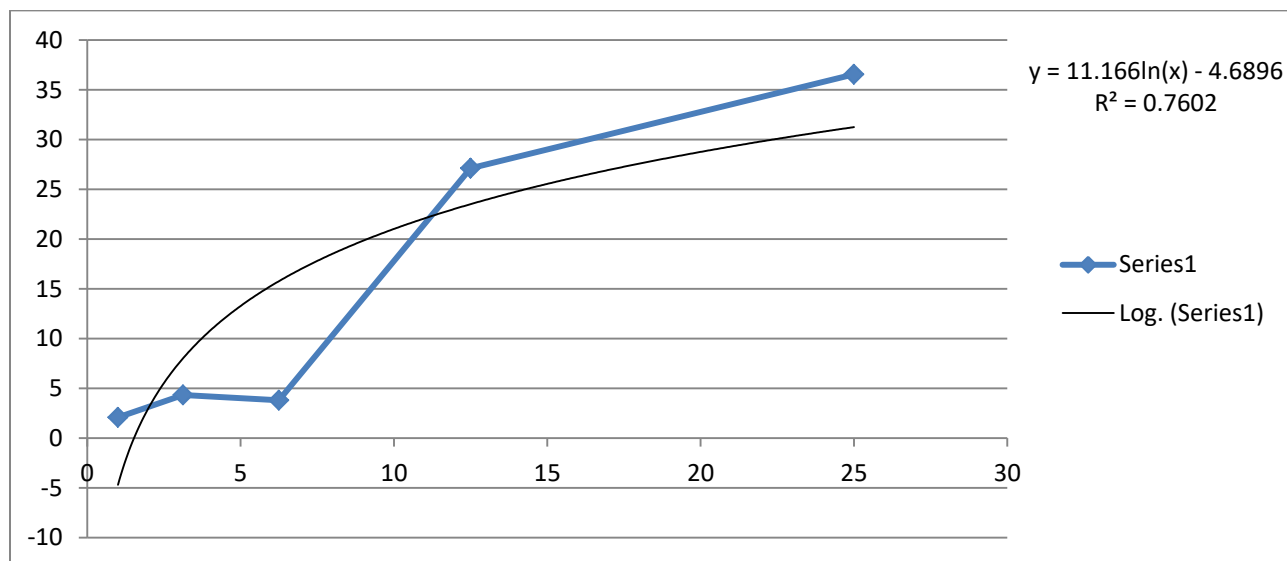

X-axis = concentration (μM) of compound 8

Y-axis = % Cell Proliferation Inhibition

IC<sub>50</sub> > 25 μM

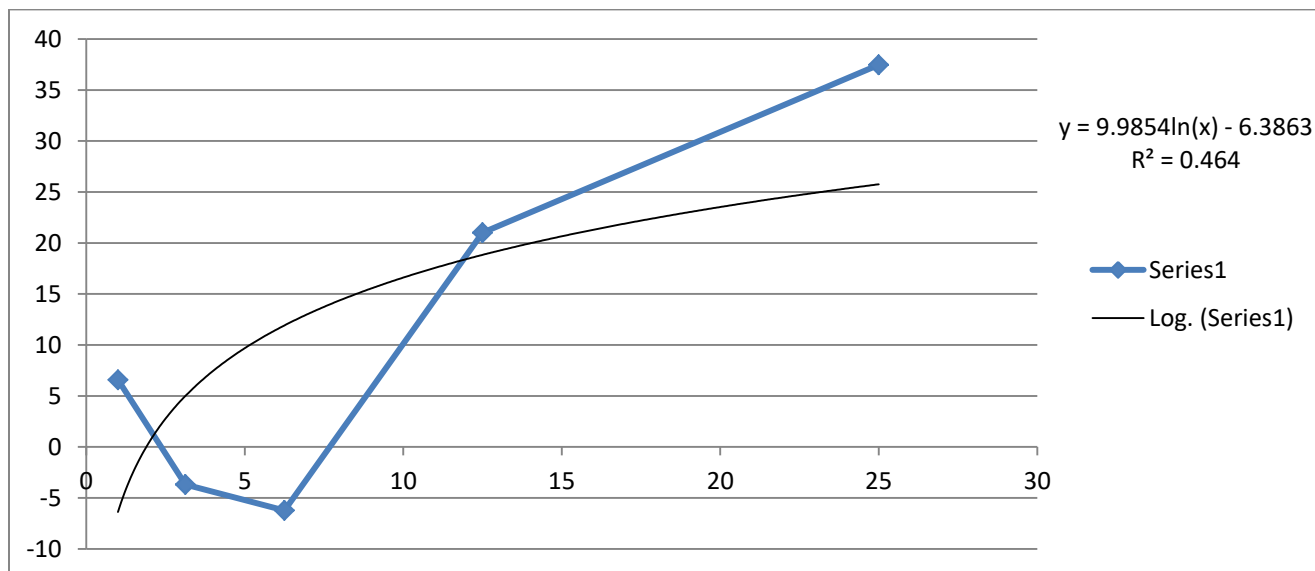

X-axis = concentration (μM) of compound 8

Y-axis = % Cell Proliferation Inhibition

IC<sub>50</sub> > 25 μM

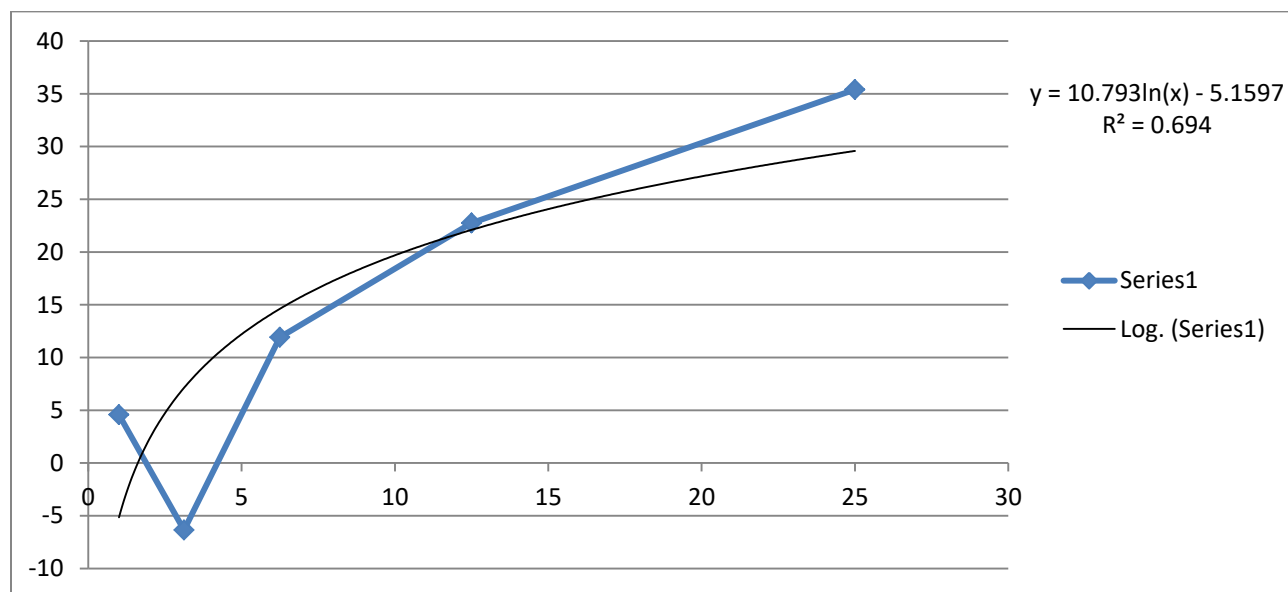

X-axis = concentration (μM) of compound 8

Y-axis = % Cell Proliferation Inhibition

IC<sub>50</sub> > 25 μM

17. The curves that we used to calculate the IC<sub>50</sub> value for compound **8** against DU145

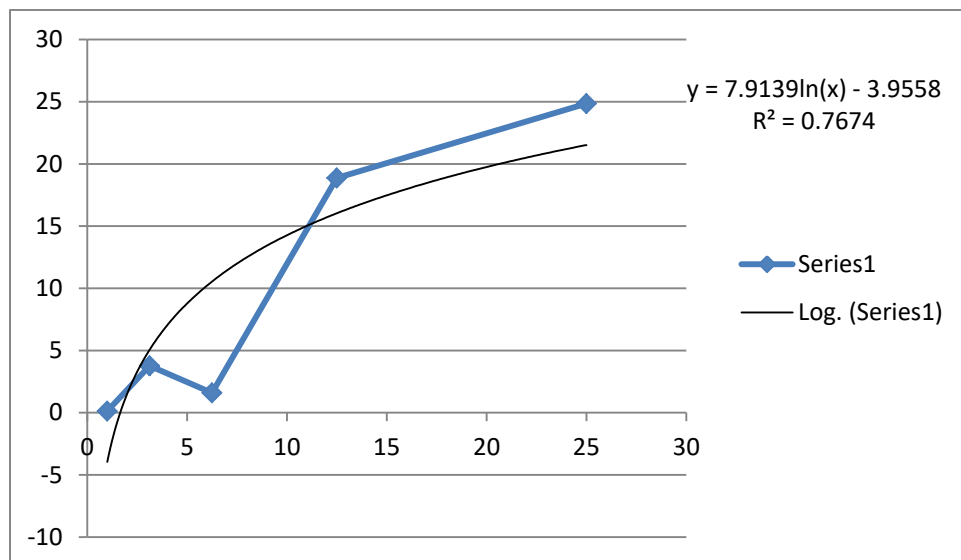

X-axis = concentration (μM) of compound **8**

Y-axis = % Cell Proliferation Inhibition

IC<sub>50</sub> > 25 μM

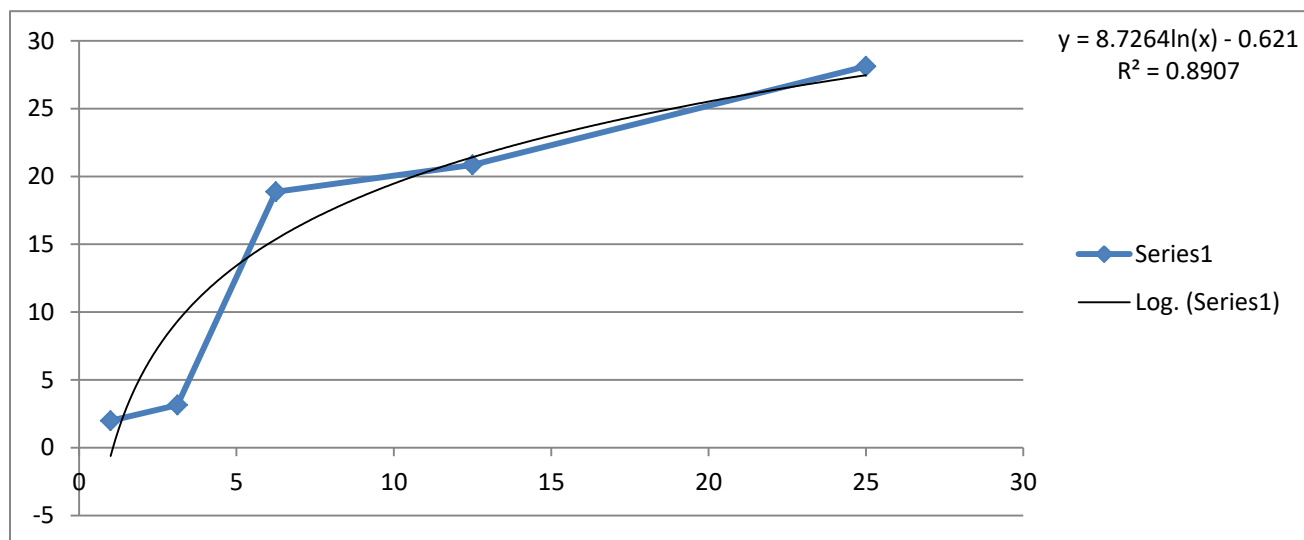

X-axis = concentration (μM) of compound **8**

Y-axis = % Cell Proliferation Inhibition

IC<sub>50</sub> > 25 μM

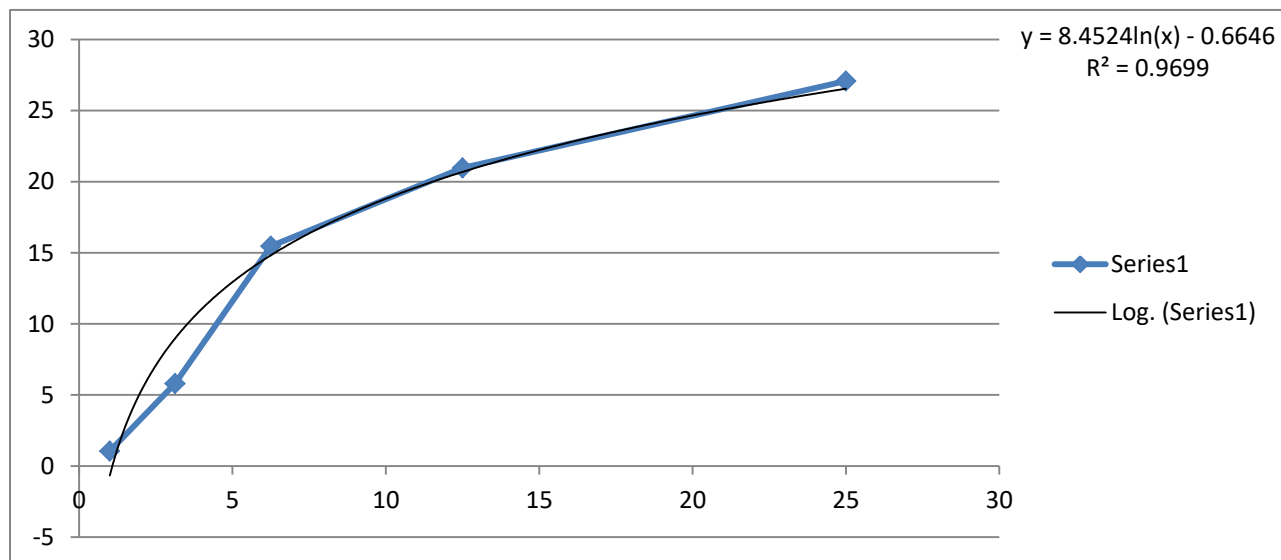

X-axis = concentration (μM) of compound **8**  
Y-axis = % Cell Proliferation Inhibition  
IC<sub>50</sub> > 25 μM

18. The curves that we used to calculate the IC<sub>50</sub> value for compound **8** against LNCaP

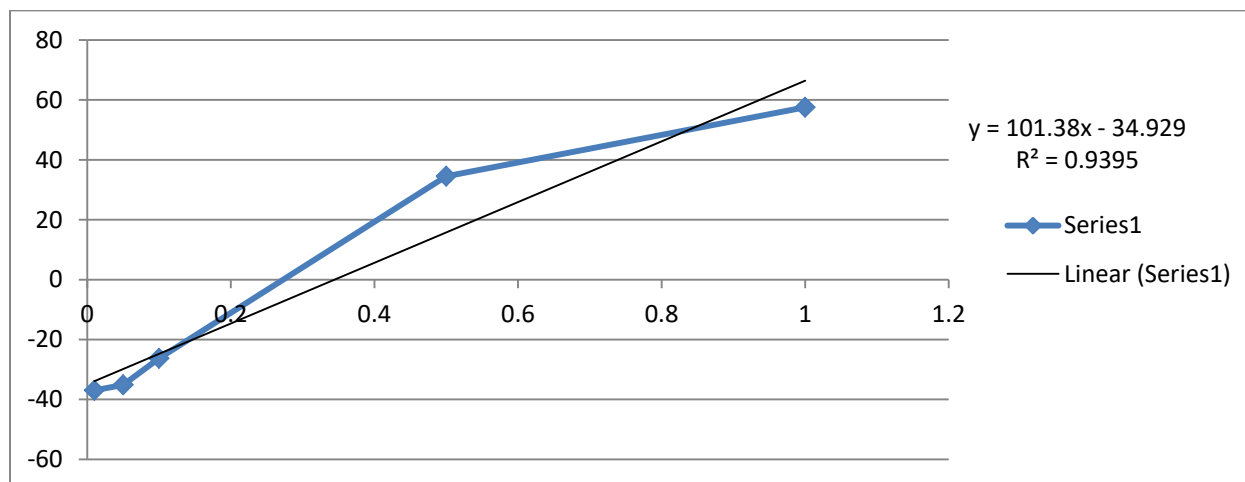

X-axis = concentration (μM) of compound **8**  
Y-axis = % Cell Proliferation Inhibition  
IC<sub>50</sub> = 0.838 μM

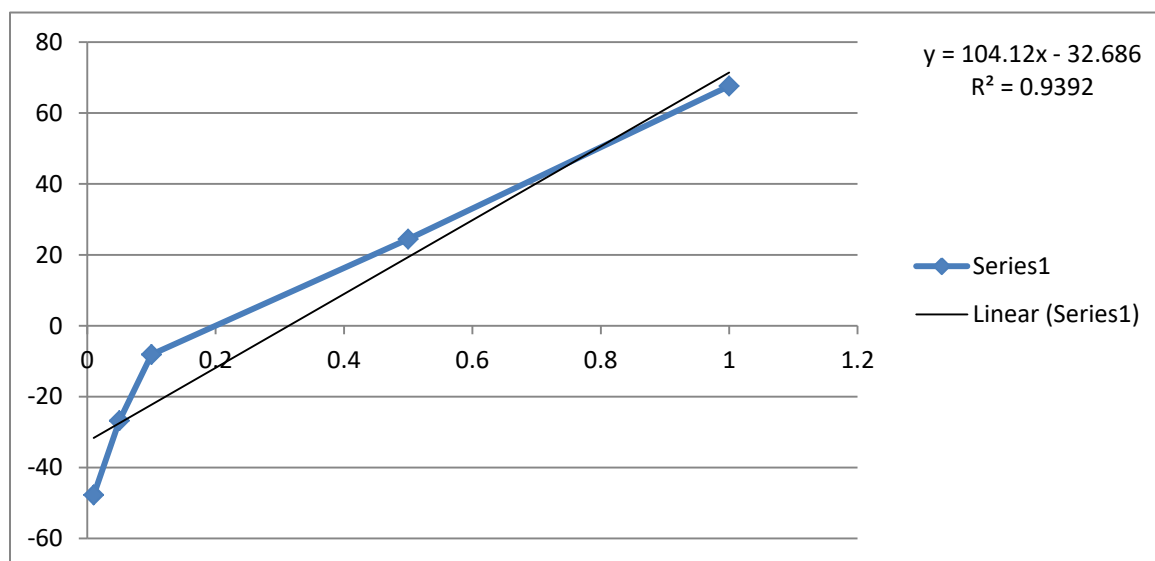

X-axis = concentration ( $\mu\text{M}$ ) of compound **8**

Y-axis = % Cell Proliferation Inhibition

$\text{IC}_{50} = 0.794 \mu\text{M}$

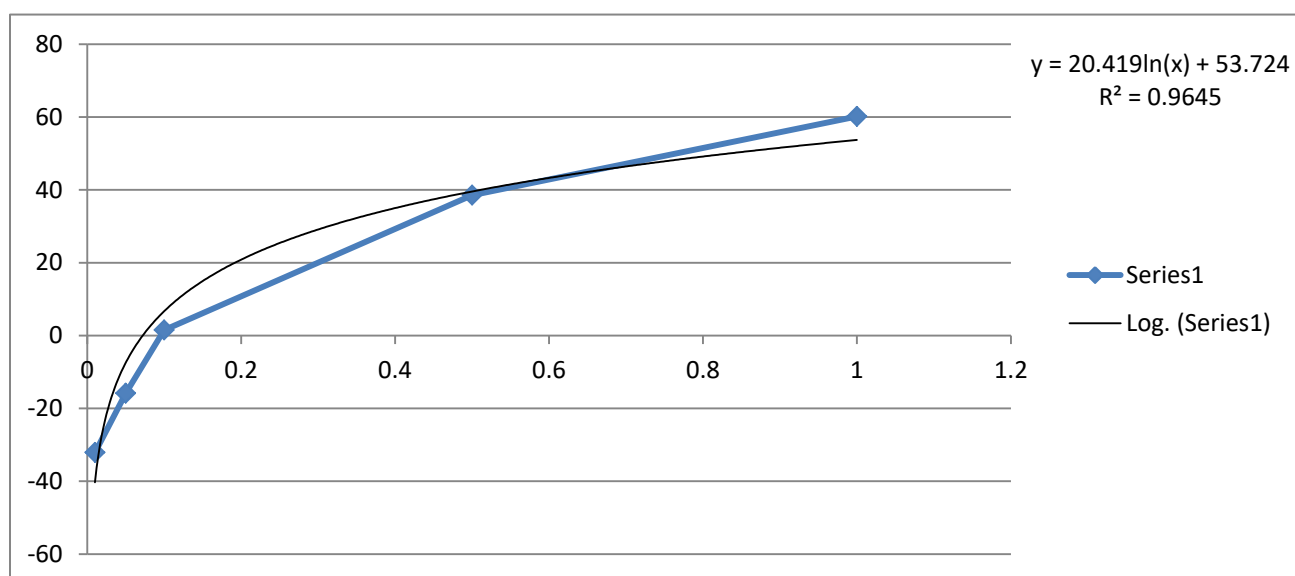

X-axis = concentration ( $\mu\text{M}$ ) of compound **8**

Y-axis = % Cell Proliferation Inhibition

$\text{IC}_{50} = 0.833 \mu\text{M}$

19. The curves that we used to calculate the IC<sub>50</sub> value for compound **9** against PC-3

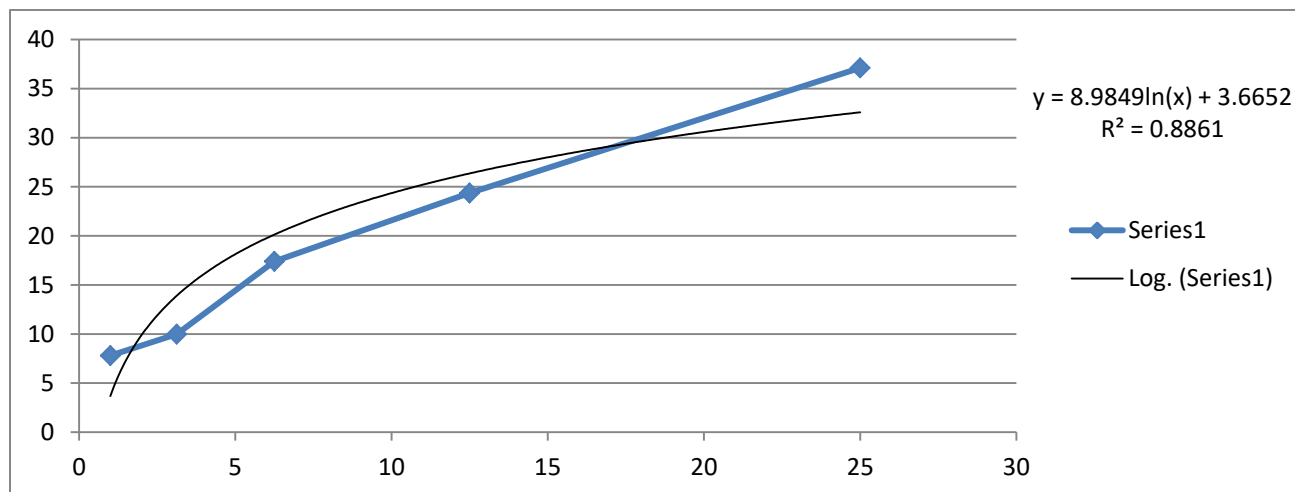

X-axis = concentration (μM) of compound **9**

Y-axis = % Cell Proliferation Inhibition

IC<sub>50</sub> > 25 μM

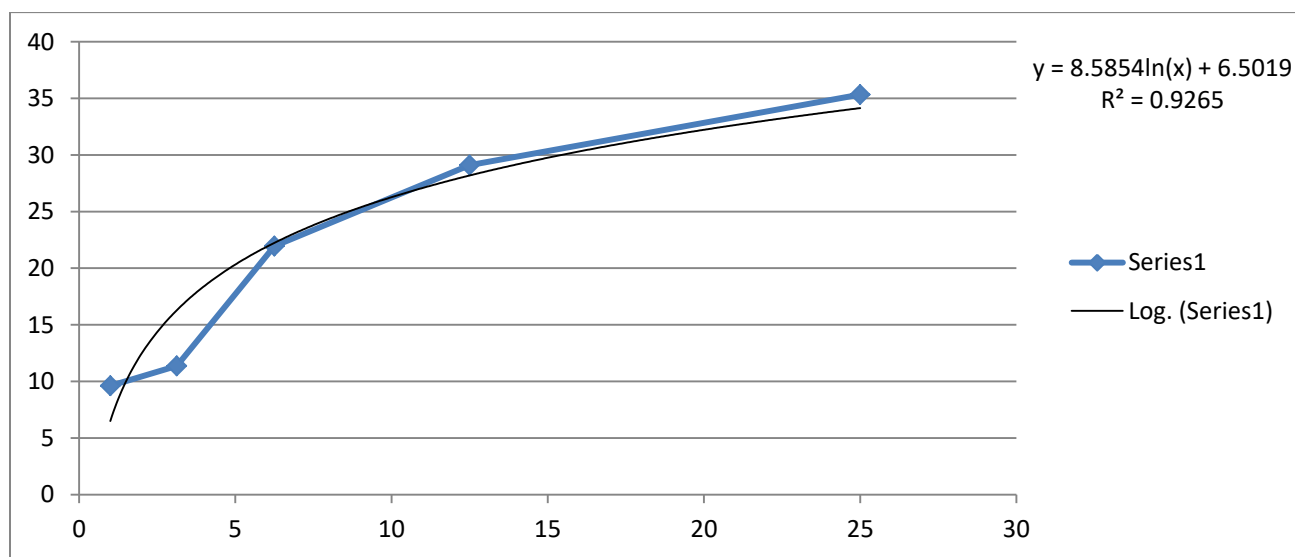

X-axis = concentration (μM) of compound **9**

Y-axis = % Cell Proliferation Inhibition

IC<sub>50</sub> > 25 μM



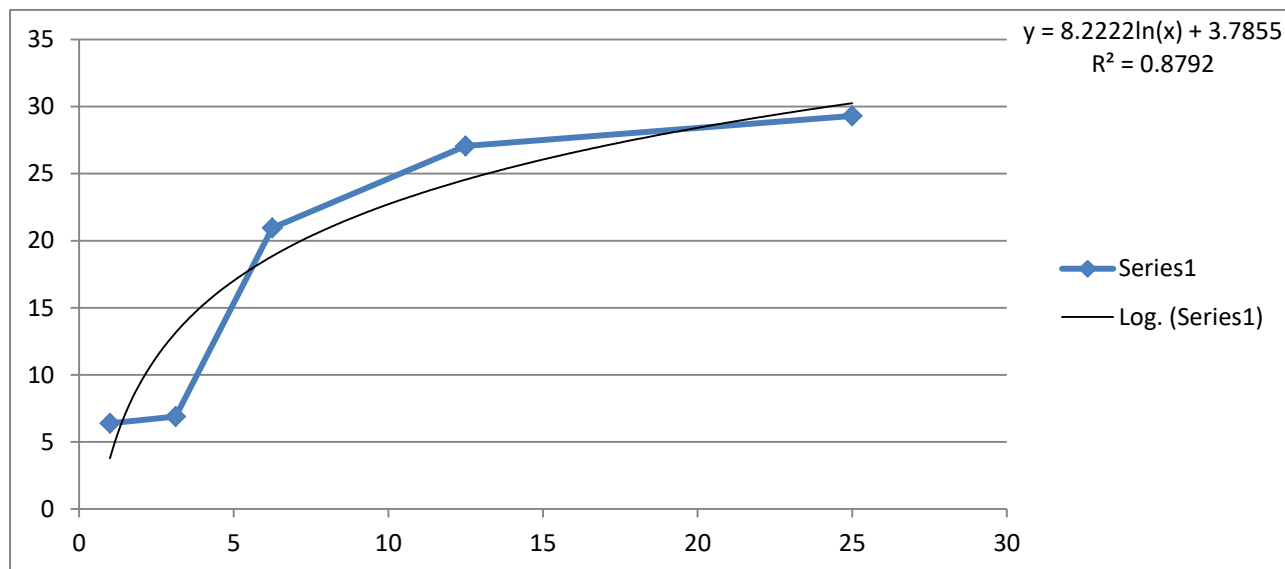

X-axis = concentration (μM) of compound 9  
Y-axis = % Cell Proliferation Inhibition  
IC<sub>50</sub> > 25 μM

20. The curves that we used to calculate the IC<sub>50</sub> value for compound 9 against DU145

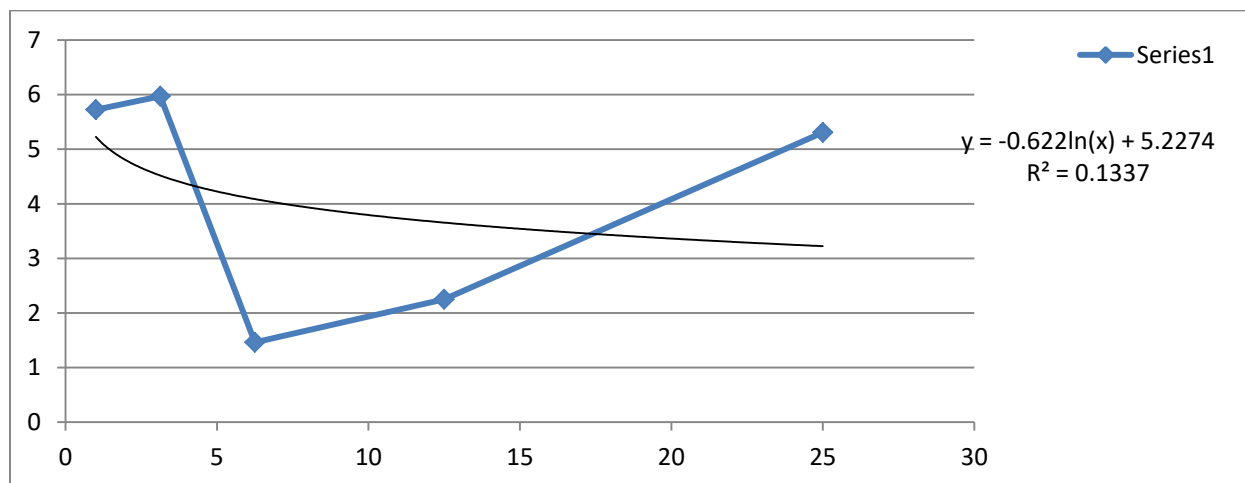

X-axis = concentration (μM) of compound 9  
Y-axis = % Cell Proliferation Inhibition  
IC<sub>50</sub> > 25 μM

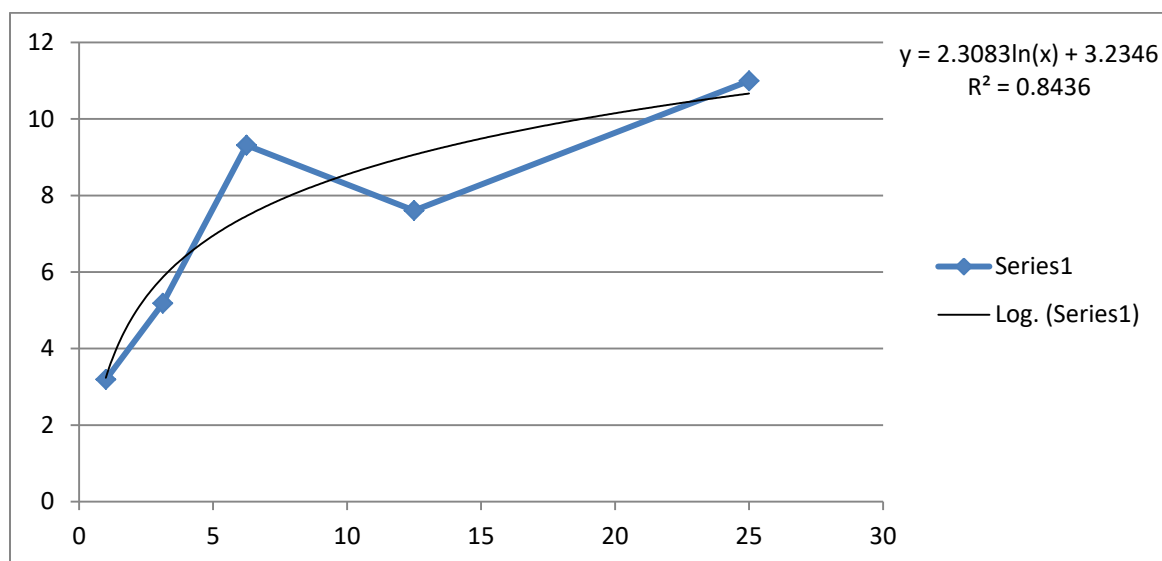

X-axis = concentration ( $\mu\text{M}$ ) of compound **9**  
 Y-axis = % Cell Proliferation Inhibition  
 IC<sub>50</sub> > 25  $\mu\text{M}$

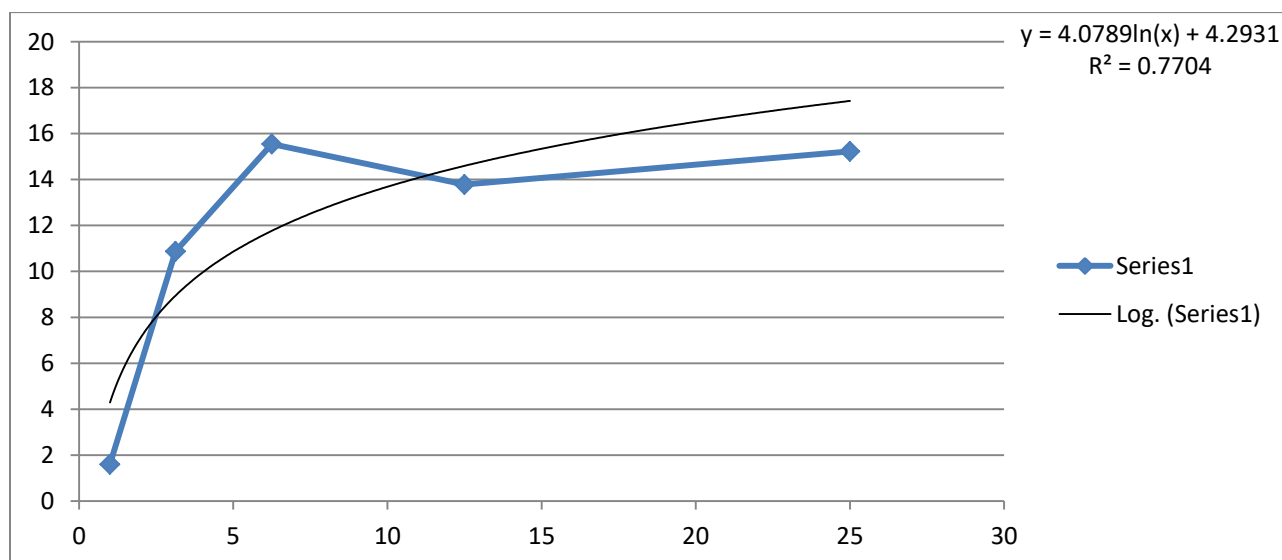

X-axis = concentration ( $\mu\text{M}$ ) of compound **9**  
 Y-axis = % Cell Proliferation Inhibition  
 IC<sub>50</sub> > 25  $\mu\text{M}$

21. The curves that we used to calculate the IC<sub>50</sub> value for compound **9** against LNCaP

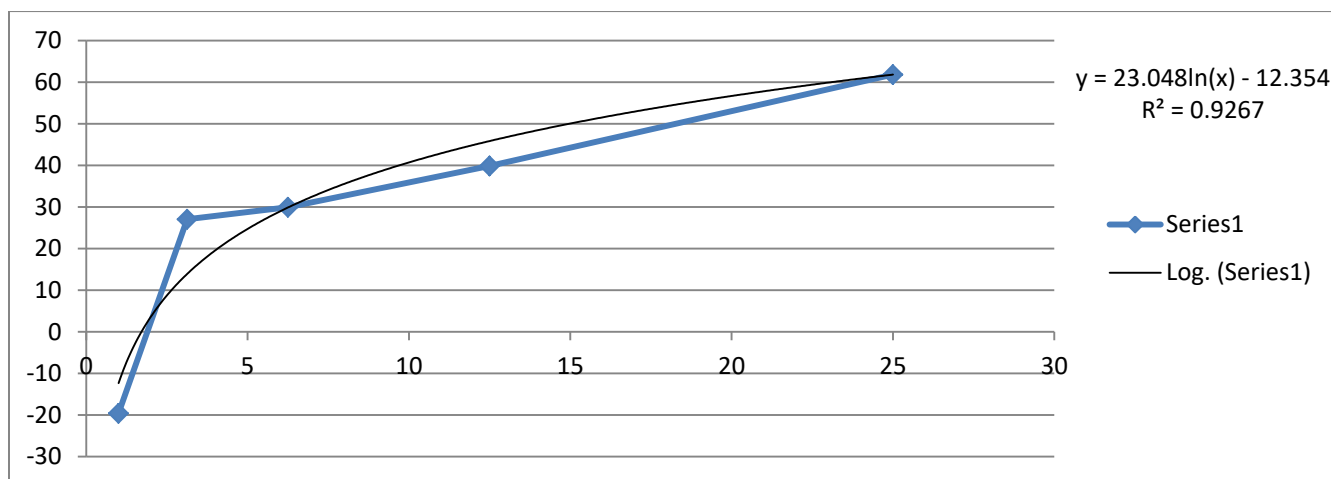

X-axis = concentration (μM) of compound **9**

Y-axis = % Cell Proliferation Inhibition

IC<sub>50</sub> = 14.960 μM

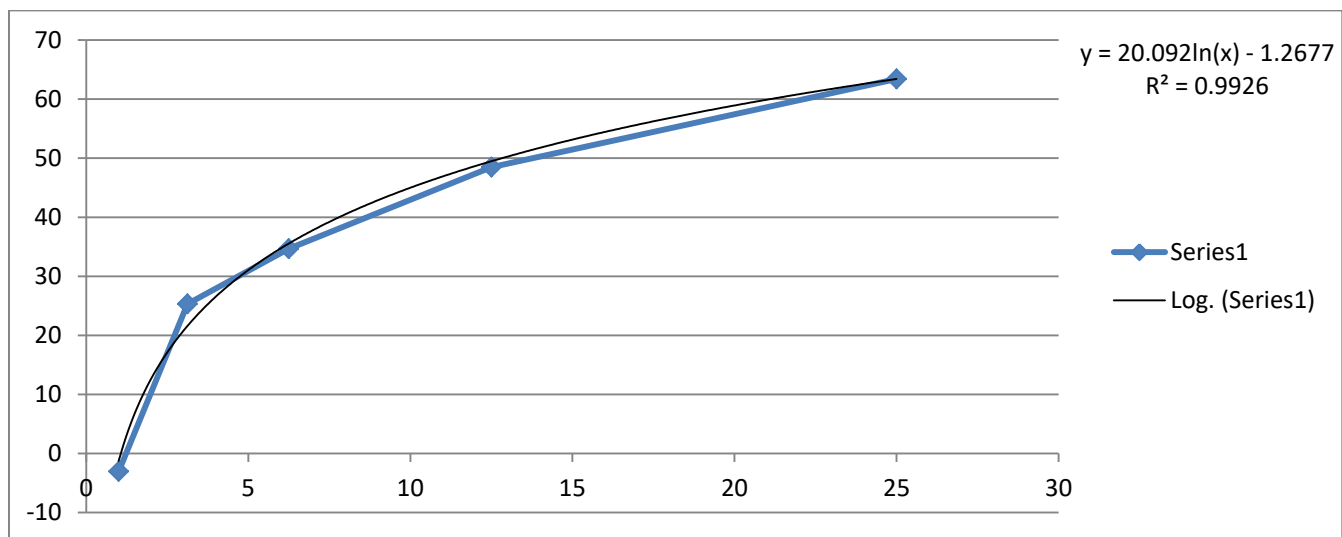

X-axis = concentration (μM) of compound **9**

Y-axis = % Cell Proliferation Inhibition

IC<sub>50</sub> = 12.828 μM

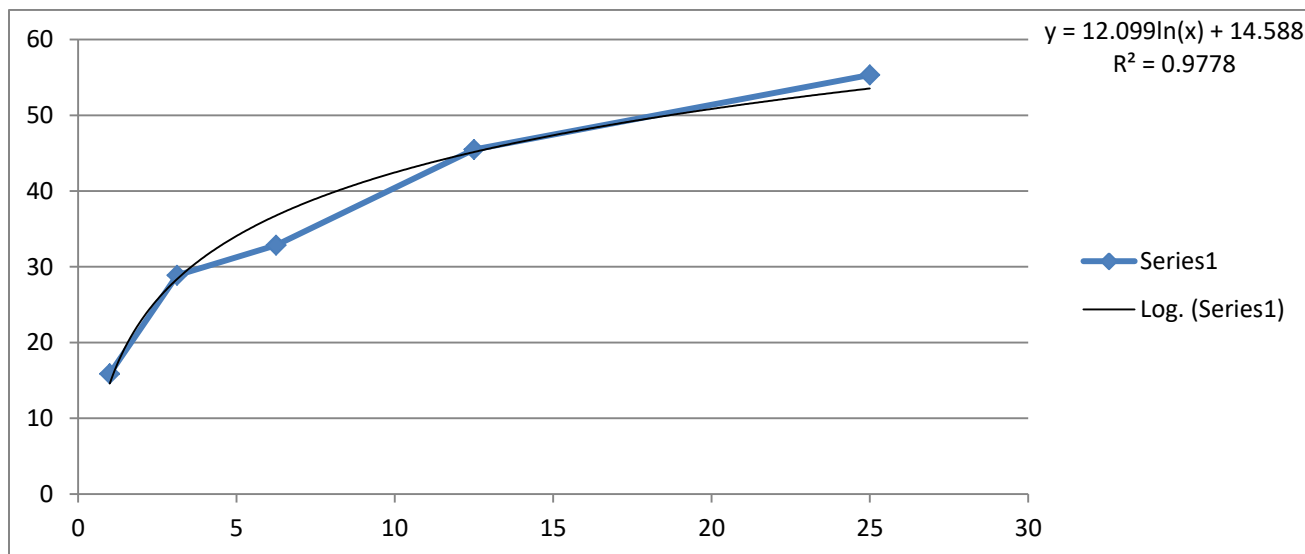

X-axis = concentration ( $\mu\text{M}$ ) of compound **9**

Y-axis = % Cell Proliferation Inhibition

$\text{IC}_{50} = 18.669 \mu\text{M}$

22. The curves that we used to calculate the  $\text{IC}_{50}$  value for compound **11** against PC-3

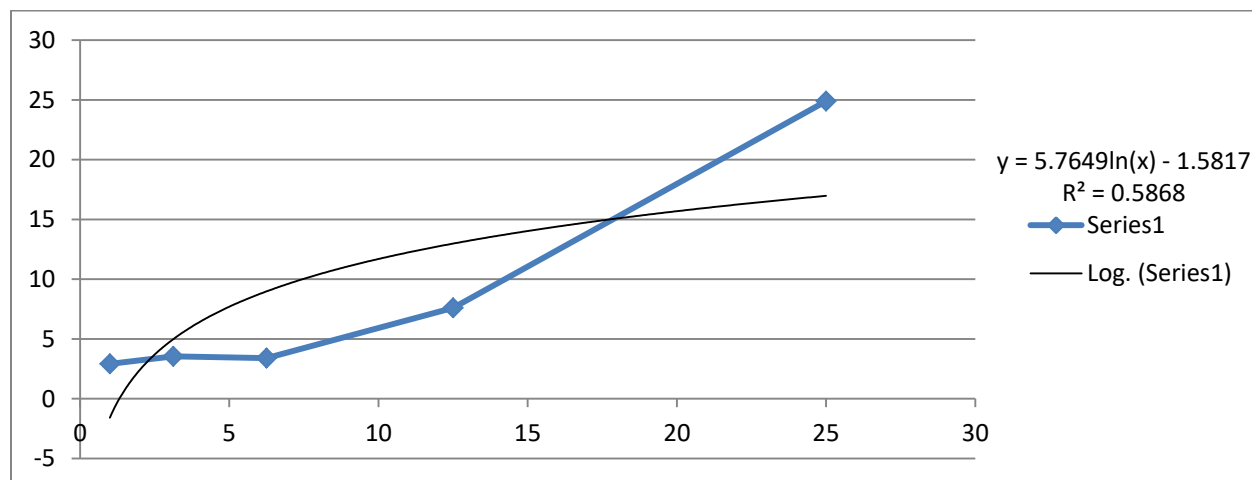

X-axis = concentration ( $\mu\text{M}$ ) of compound **11**

Y-axis = % Cell Proliferation Inhibition

$\text{IC}_{50} > 25 \mu\text{M}$

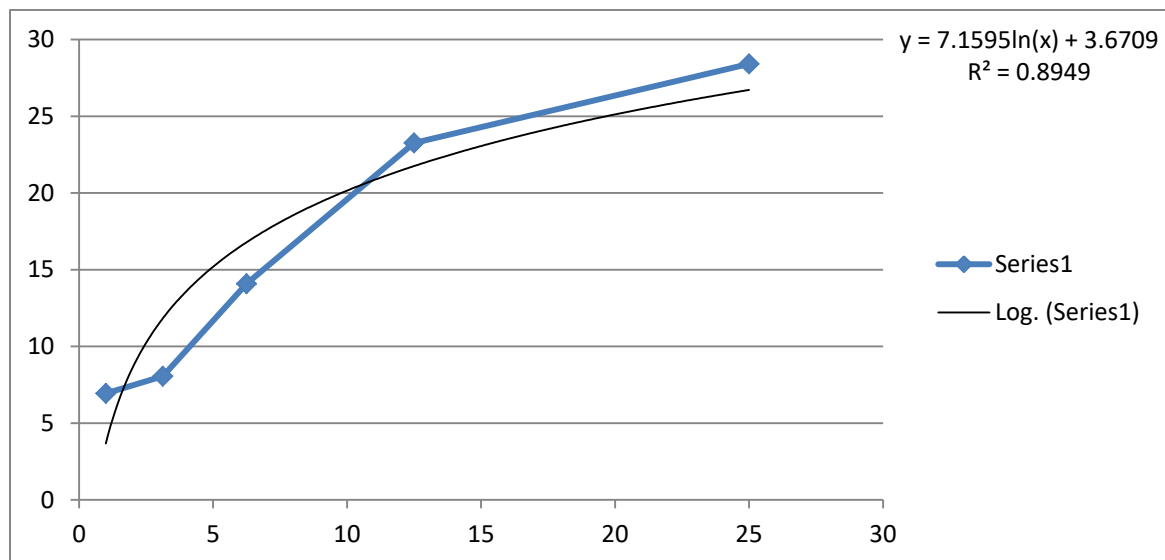

X-axis = concentration ( $\mu\text{M}$ ) of compound **11**  
Y-axis = % Cell Proliferation Inhibition  
IC<sub>50</sub> > 25  $\mu\text{M}$

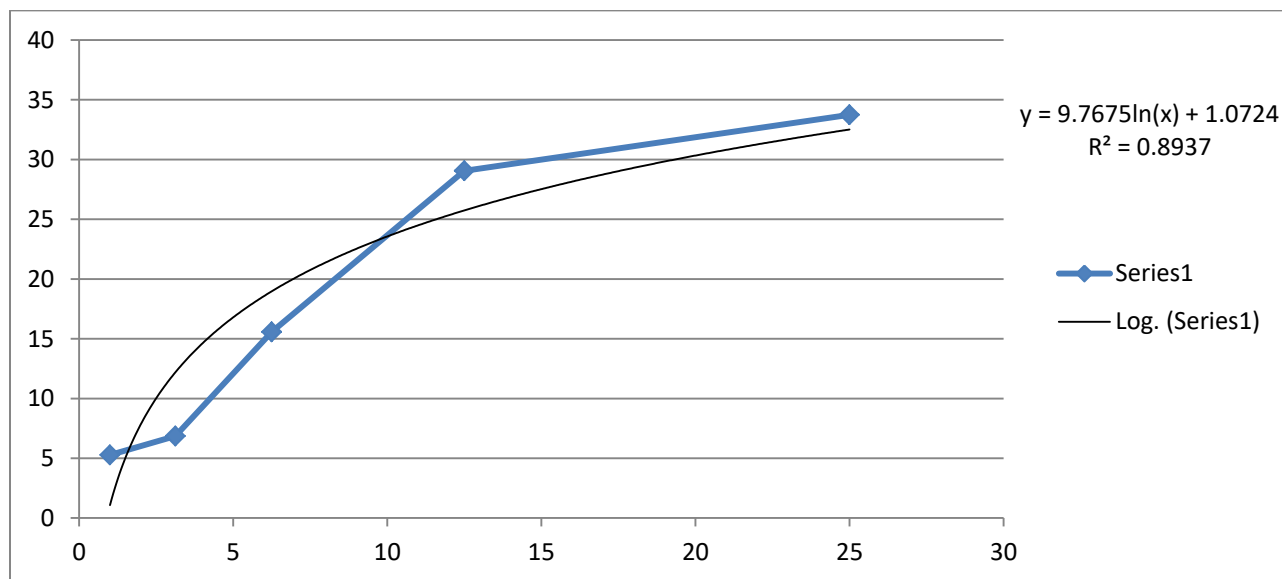

X-axis = concentration ( $\mu\text{M}$ ) of compound **11**  
Y-axis = % Cell Proliferation Inhibition  
IC<sub>50</sub> > 25  $\mu\text{M}$

23. The curves that we used to calculate the IC<sub>50</sub> value for compound **11** against DU145

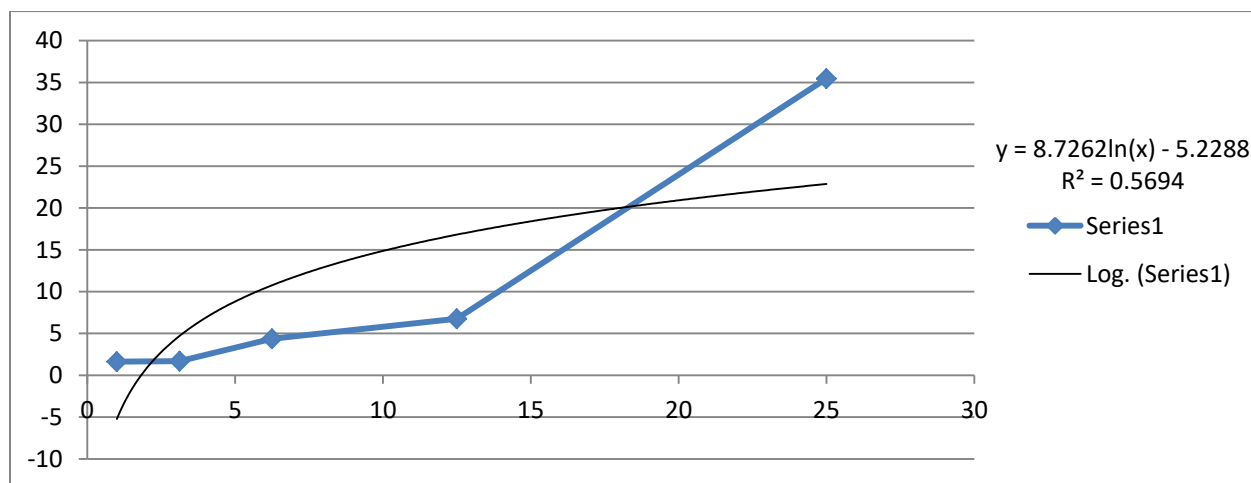

X-axis = concentration (μM) of compound **11**

Y-axis = % Cell Proliferation Inhibition

IC<sub>50</sub> > 25 μM

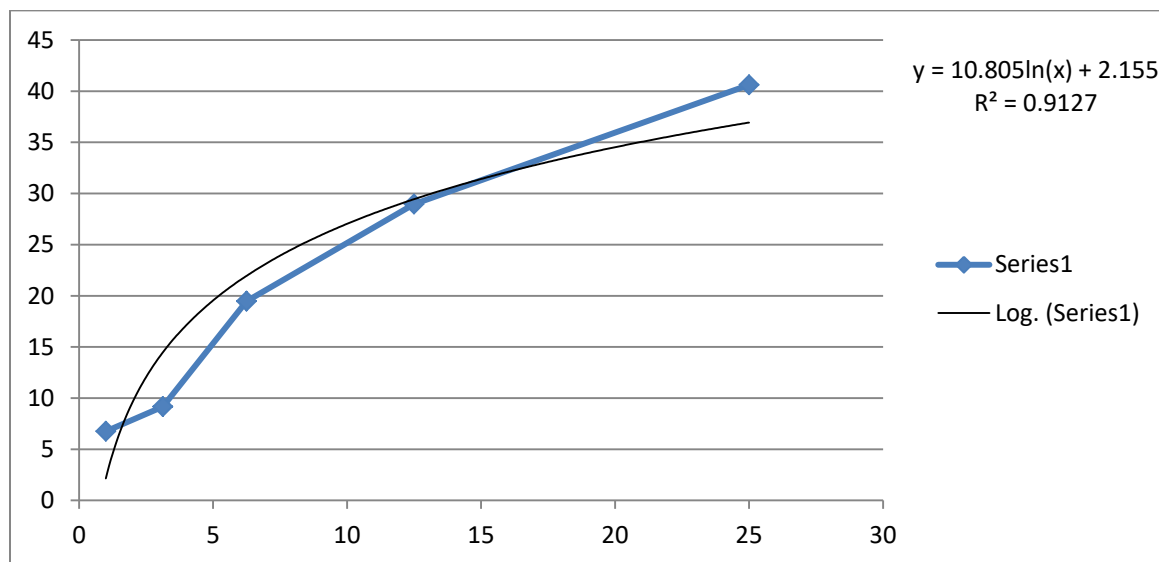

X-axis = concentration (μM) of compound **11**

Y-axis = % Cell Proliferation Inhibition

IC<sub>50</sub> > 25 μM

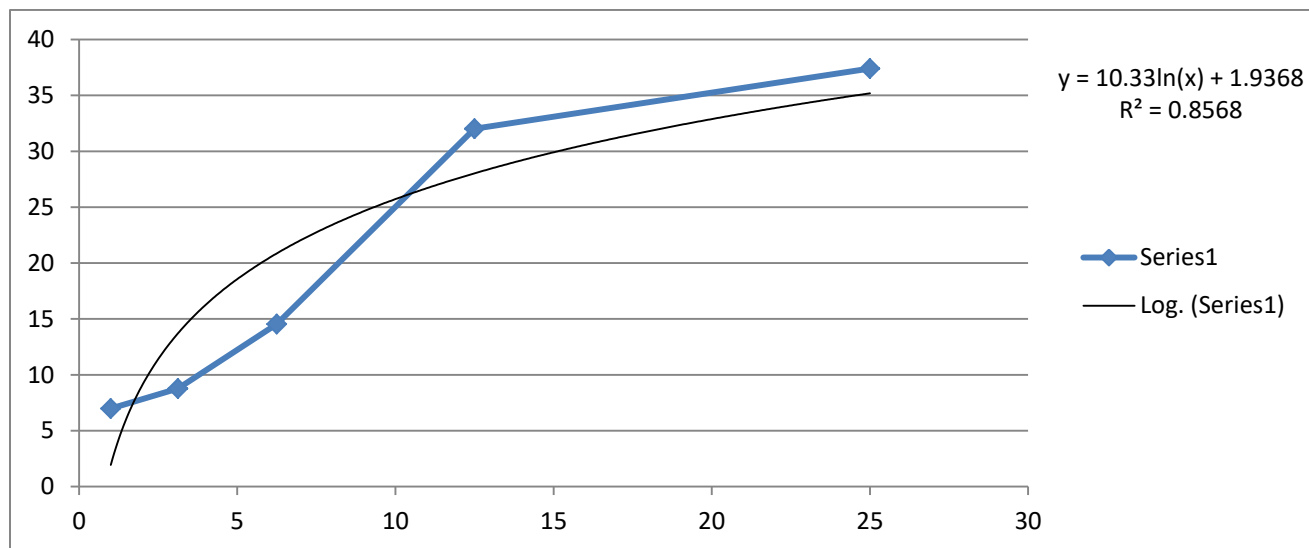

X-axis = concentration ( $\mu\text{M}$ ) of compound **11**  
 Y-axis = % Cell Proliferation Inhibition  
 IC<sub>50</sub> > 25  $\mu\text{M}$

24. The curves that we used to calculate the IC<sub>50</sub> value for compound **11** against LNCaP

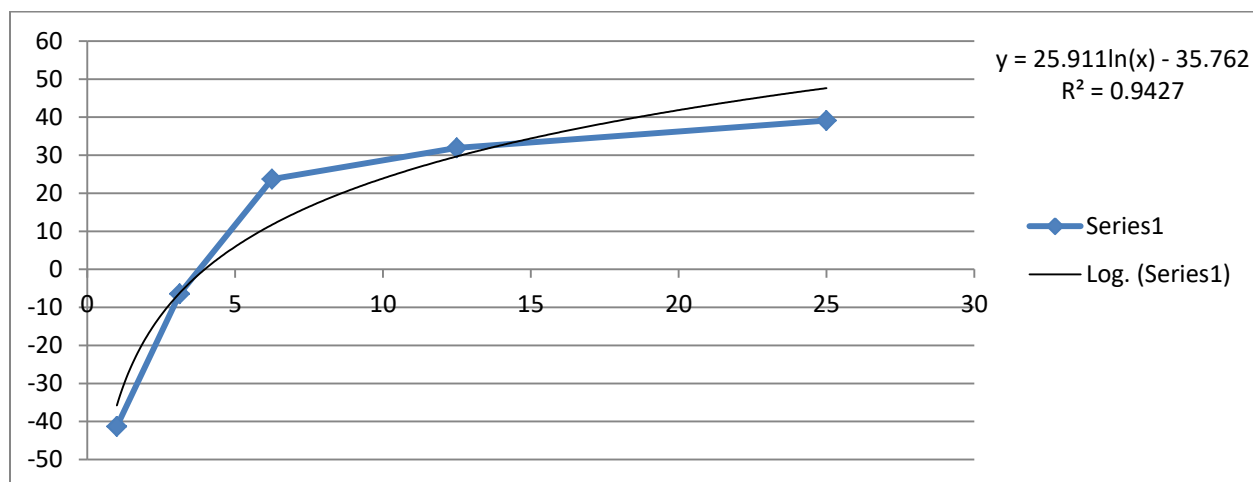

X-axis = concentration ( $\mu\text{M}$ ) of compound **11**  
 Y-axis = % Cell Proliferation Inhibition  
 IC<sub>50</sub> = 27.381  $\mu\text{M}$

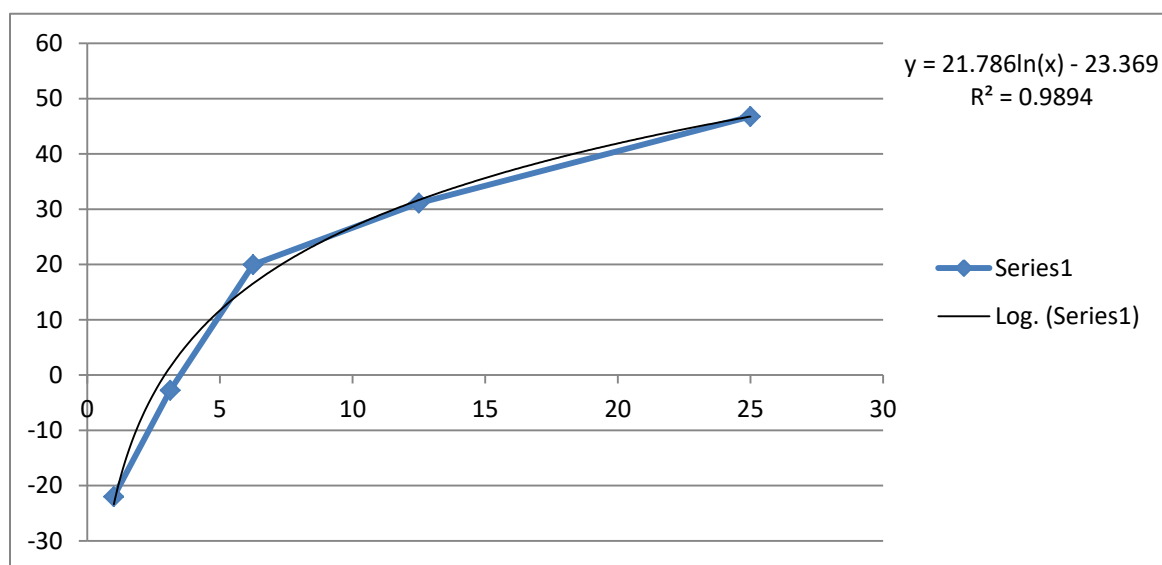

X-axis = concentration ( $\mu\text{M}$ ) of compound **11**

Y-axis = % Cell Proliferation Inhibition

$\text{IC}_{50} = 29.012 \mu\text{M}$

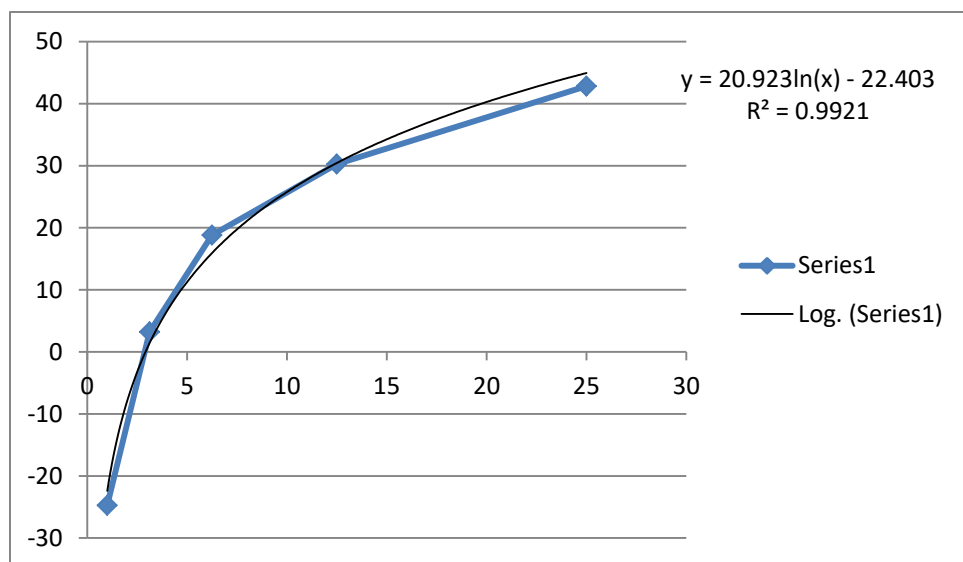

X-axis = concentration ( $\mu\text{M}$ ) of compound **11**

Y-axis = % Cell Proliferation Inhibition

$\text{IC}_{50} = 31.831 \mu\text{M}$



25. The curves that we used to calculate the IC<sub>50</sub> value for compound **12** against PC-3

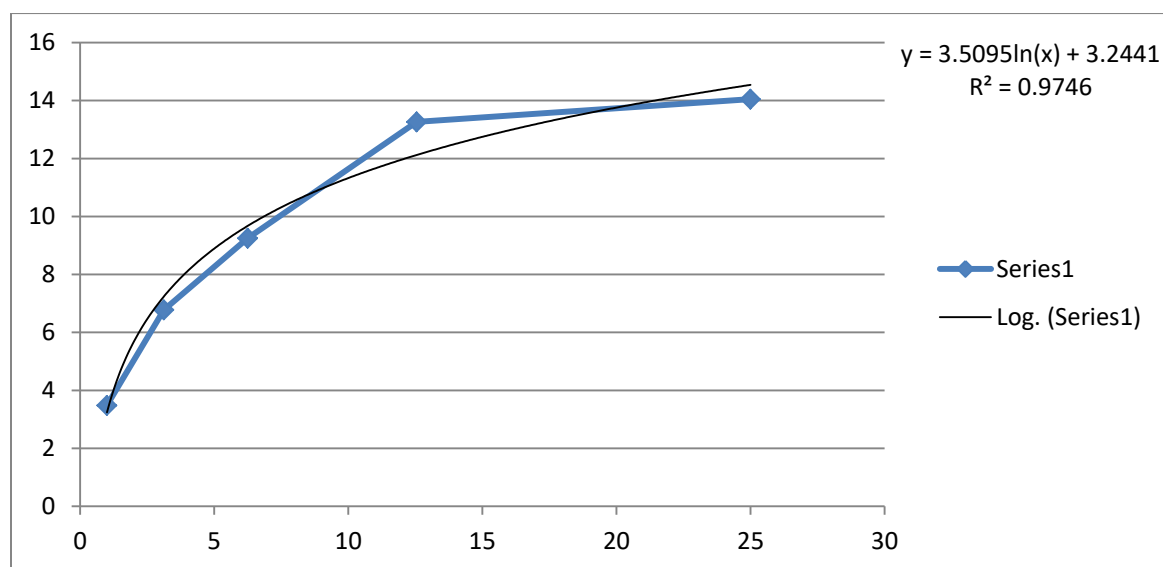

X-axis = concentration (μM) of compound **12**

Y-axis = % Cell Proliferation Inhibition

IC<sub>50</sub> > 25 μM

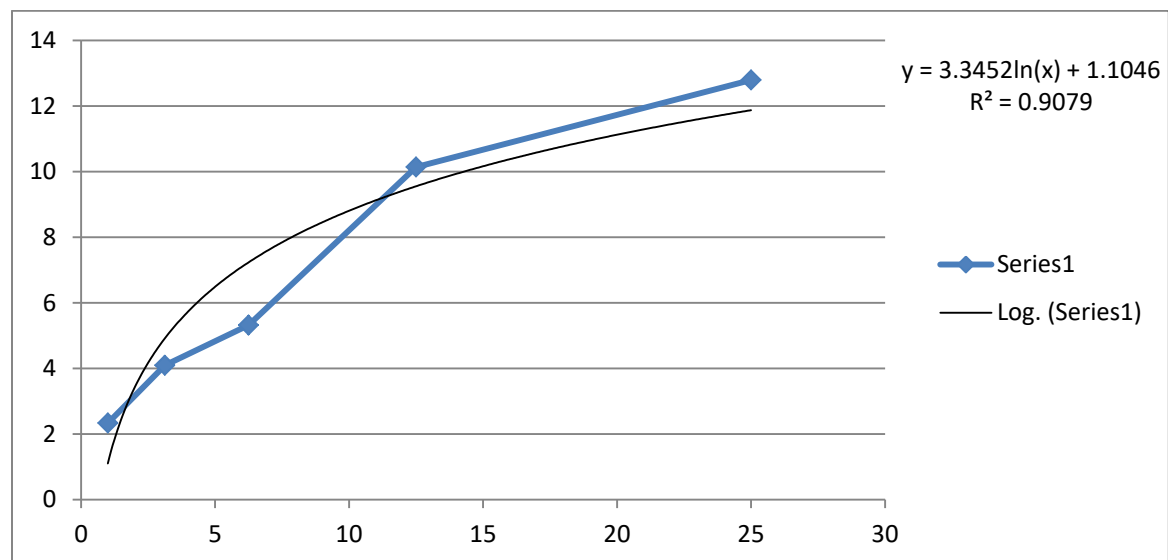

X-axis = concentration (μM) of compound **12**

Y-axis = % Cell Proliferation Inhibition

IC<sub>50</sub> > 25 μM

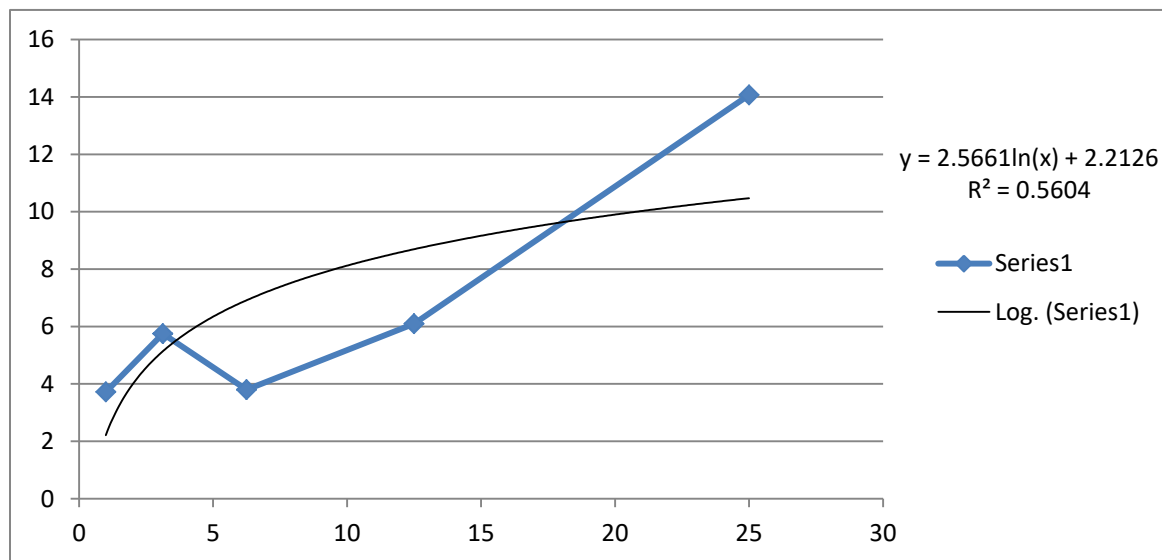

X-axis = concentration ( $\mu\text{M}$ ) of compound **12**  
Y-axis = % Cell Proliferation Inhibition  
 $\text{IC}_{50} > 25 \mu\text{M}$

26. The curves that we used to calculate the  $\text{IC}_{50}$  value for compound **12** against DU145

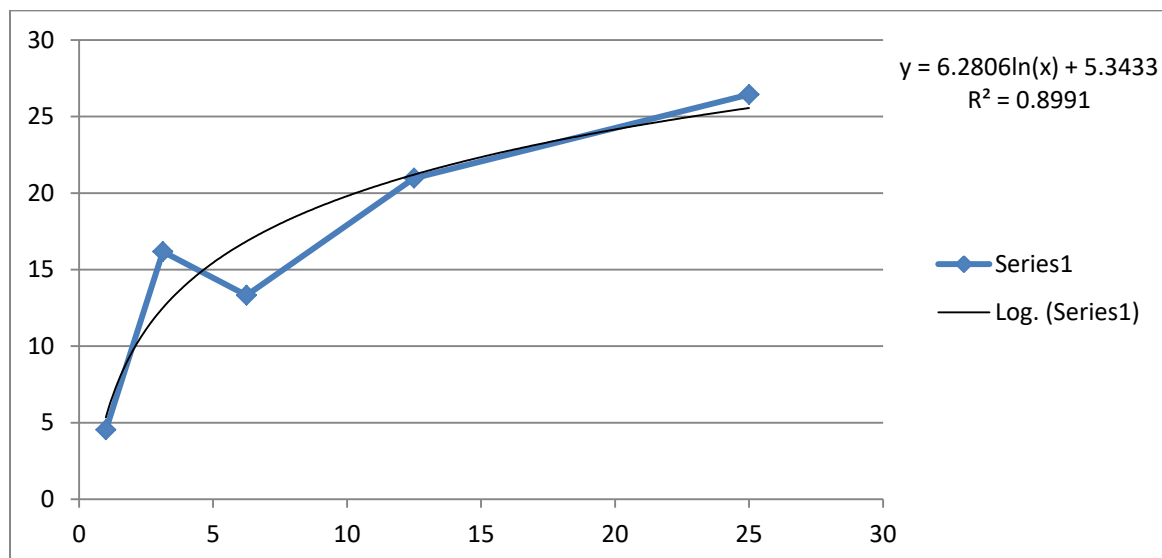

X-axis = concentration ( $\mu\text{M}$ ) of compound **12**  
Y-axis = % Cell Proliferation Inhibition  
 $\text{IC}_{50} > 25 \mu\text{M}$

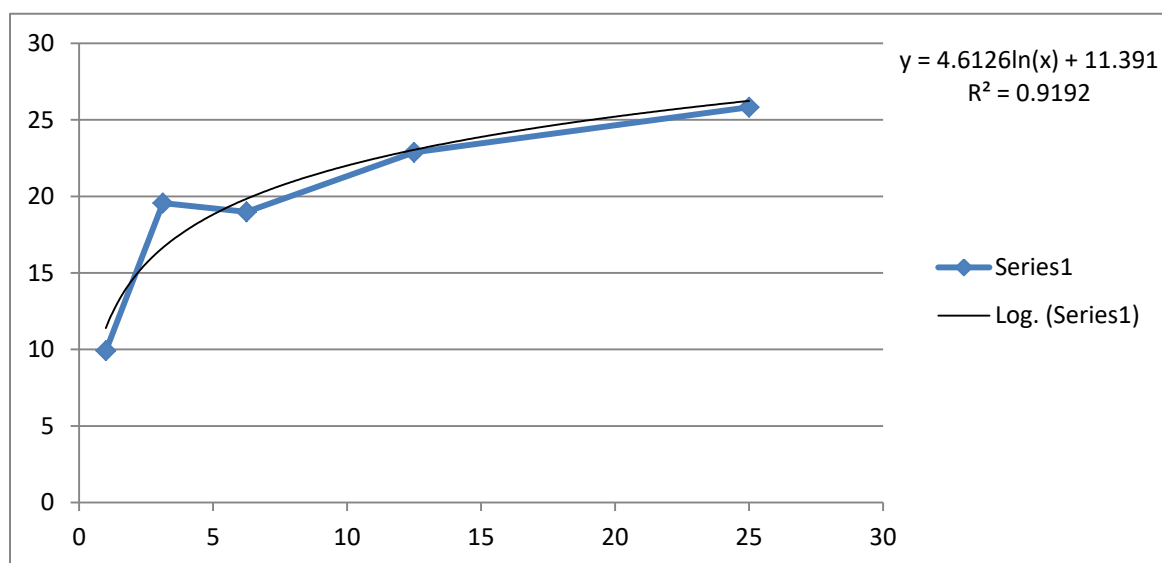

X-axis = concentration ( $\mu\text{M}$ ) of compound **12**

Y-axis = % Cell Proliferation Inhibition

IC<sub>50</sub> > 25  $\mu\text{M}$

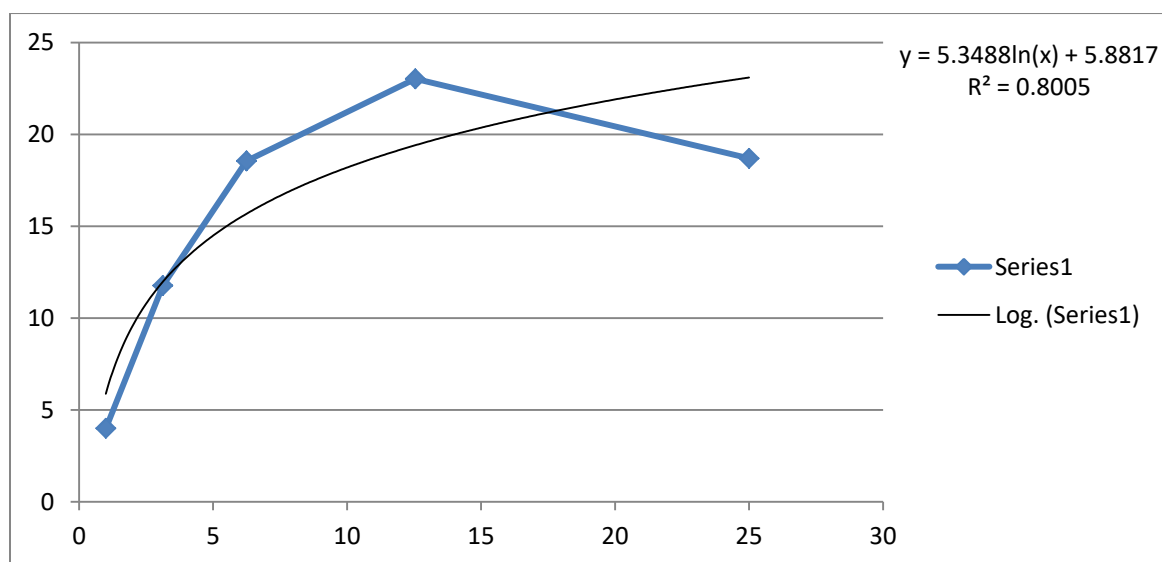

X-axis = concentration ( $\mu\text{M}$ ) of compound **12**

Y-axis = % Cell Proliferation Inhibition

IC<sub>50</sub> > 25  $\mu\text{M}$

27. The curves that we used to calculate the IC<sub>50</sub> value for compound **12** against LNCaP

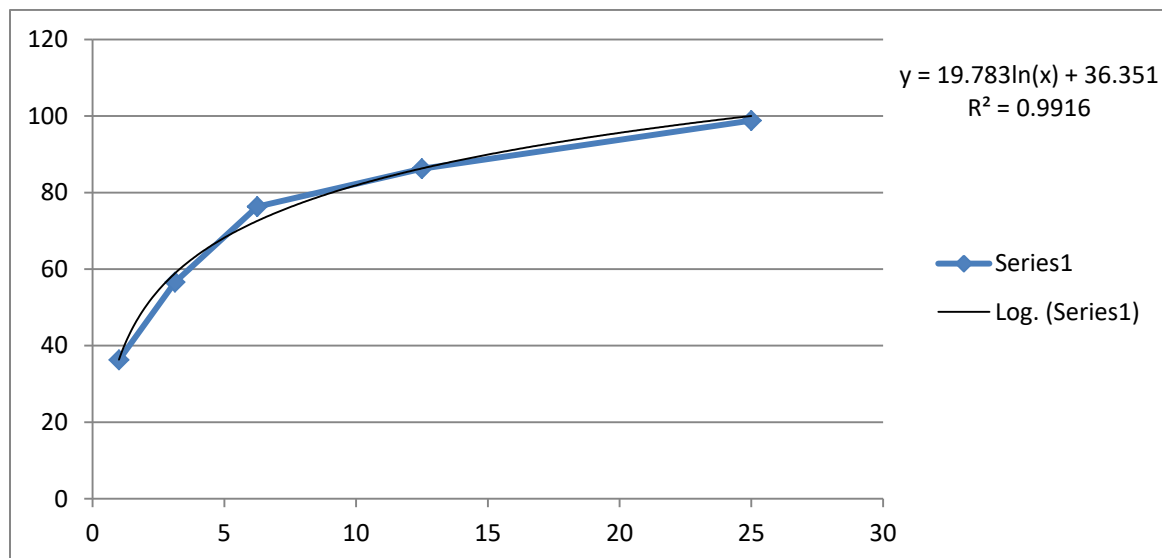

X-axis = concentration (μM) of compound **12**

Y-axis = % Cell Proliferation Inhibition

IC<sub>50</sub> = 1.994 μM

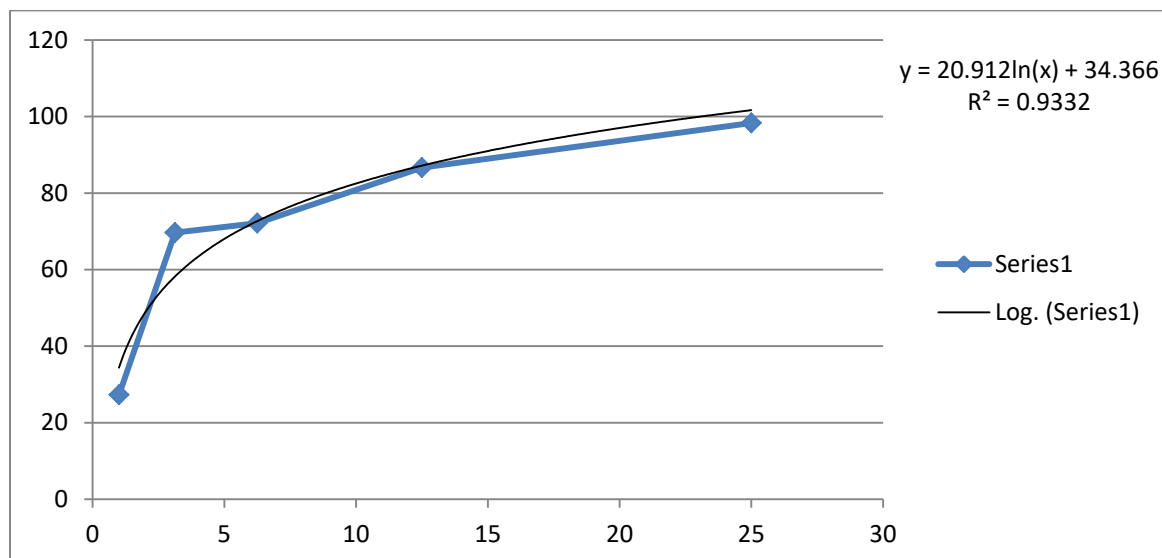

X-axis = concentration (μM) of compound **12**

Y-axis = % Cell Proliferation Inhibition

IC<sub>50</sub> = 2.112 μM

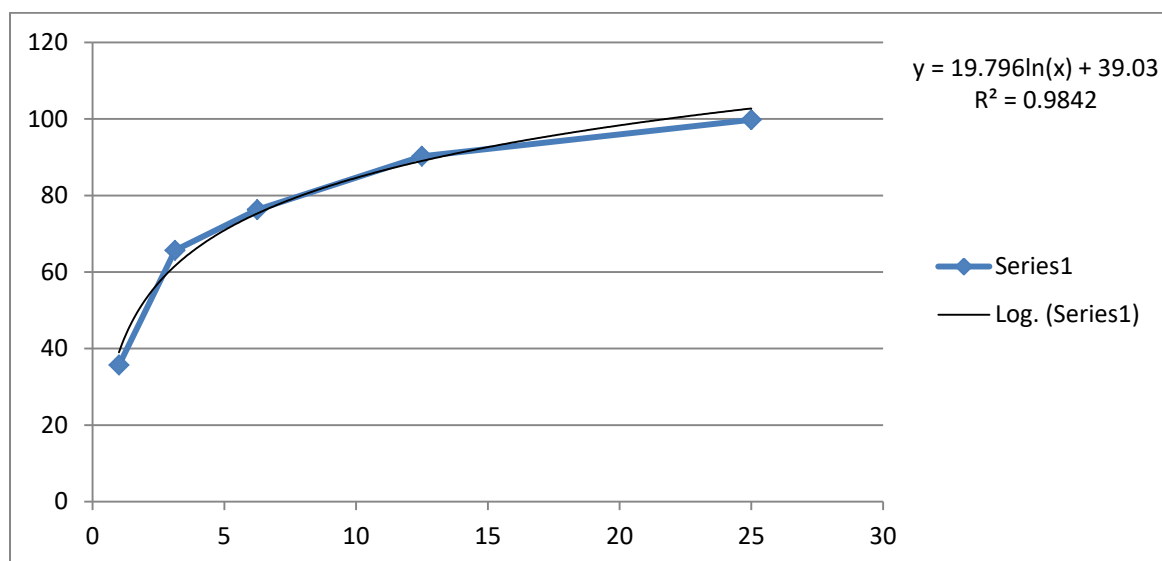

X-axis = concentration (μM) of compound **12**

Y-axis = % Cell Proliferation Inhibition

IC<sub>50</sub> = 1.740 μM

28. The curves that we used to calculate the IC<sub>50</sub> value for compound **13** against PC-3

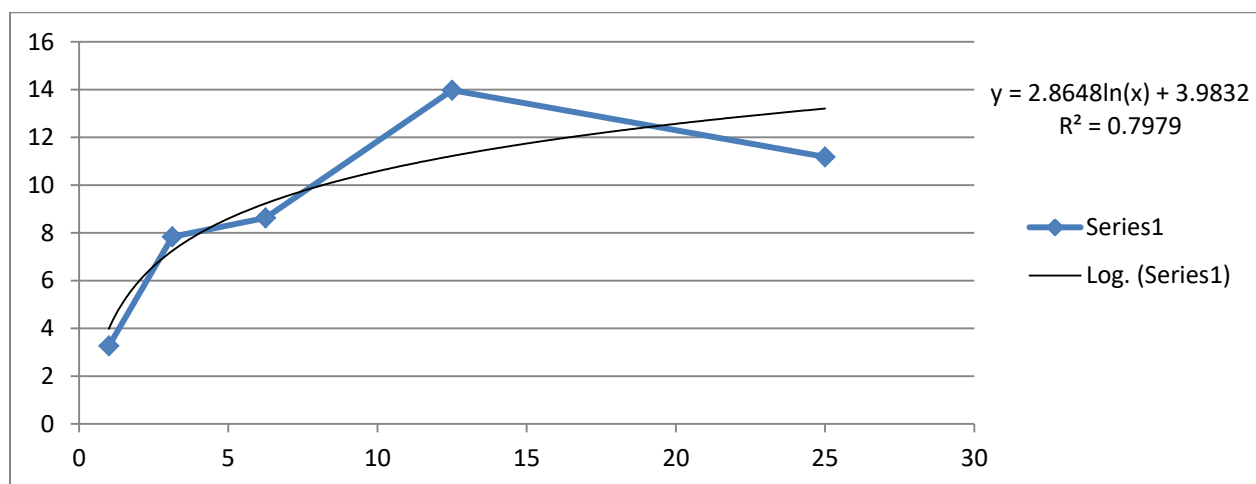

X-axis = concentration (μM) of compound **13**

Y-axis = % Cell Proliferation Inhibition

IC<sub>50</sub> > 25 μM

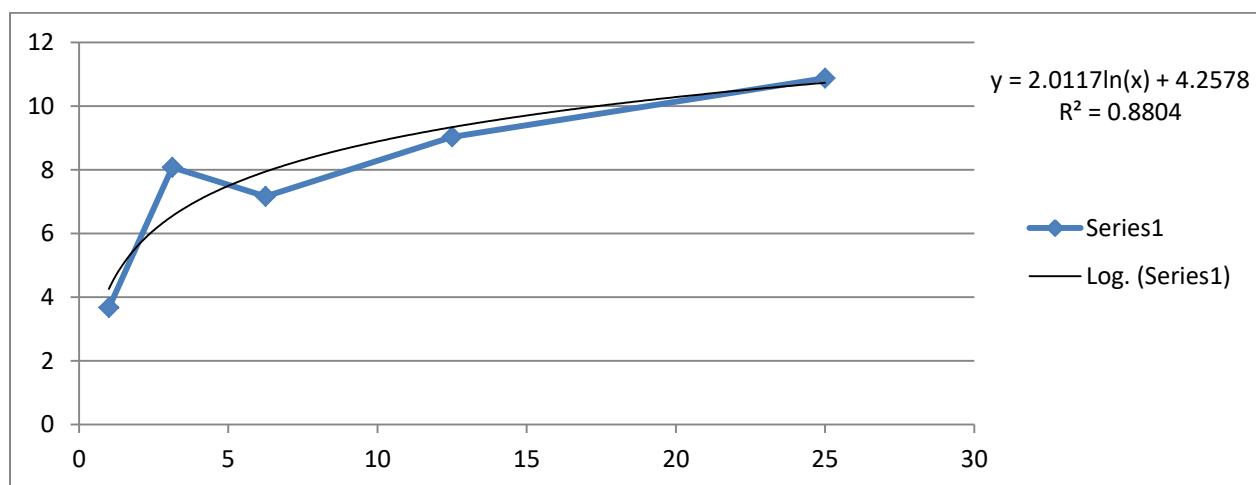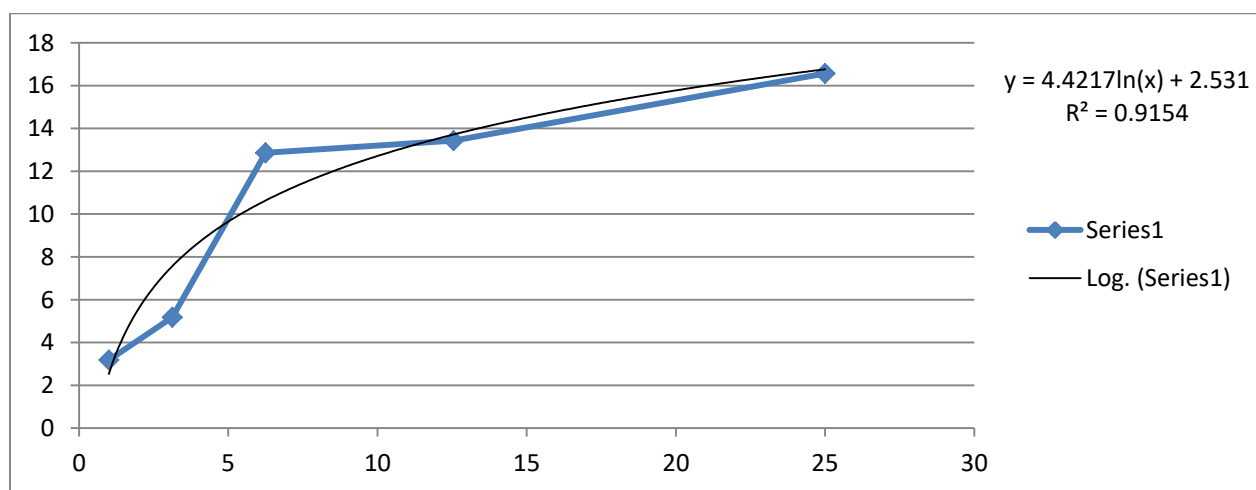

29. The curves that we used to calculate the IC<sub>50</sub> value for compound **13** against DU145

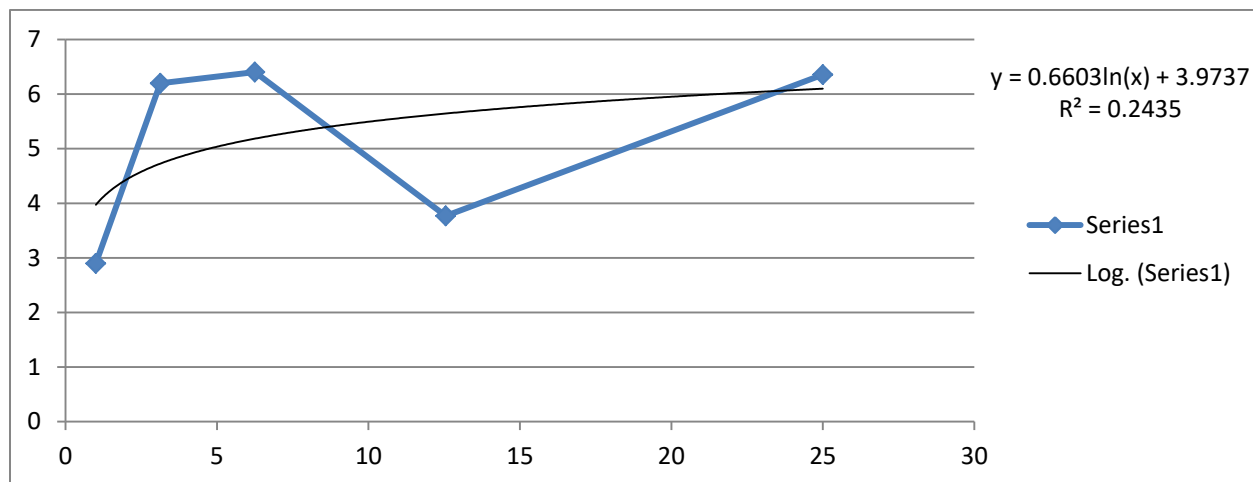

X-axis = concentration (μM) of compound **13**

Y-axis = % Cell Proliferation Inhibition

IC<sub>50</sub> > 25 μM

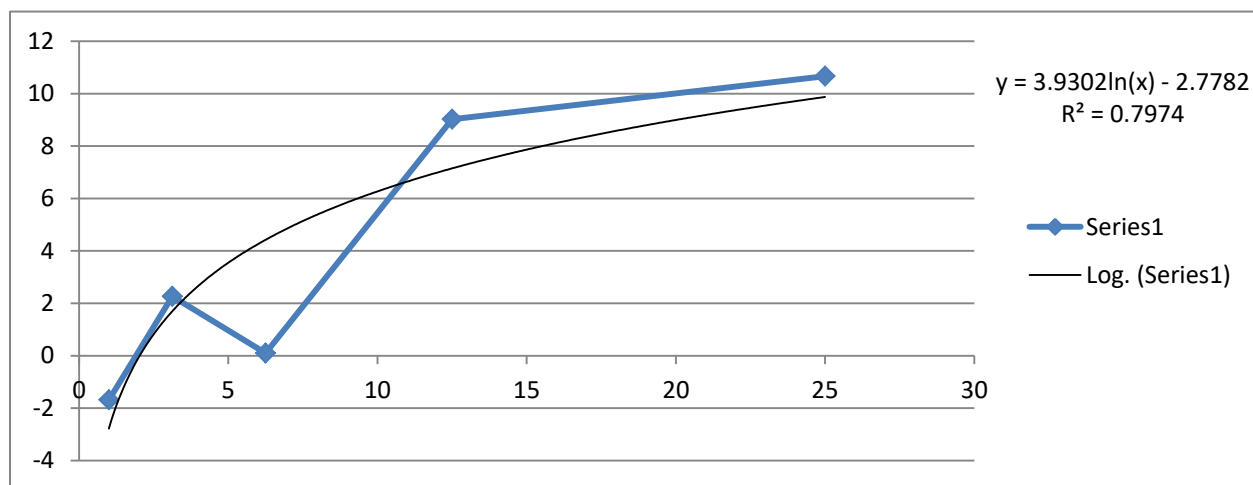

X-axis = concentration (μM) of compound **13**

Y-axis = % Cell Proliferation Inhibition

IC<sub>50</sub> > 25 μM

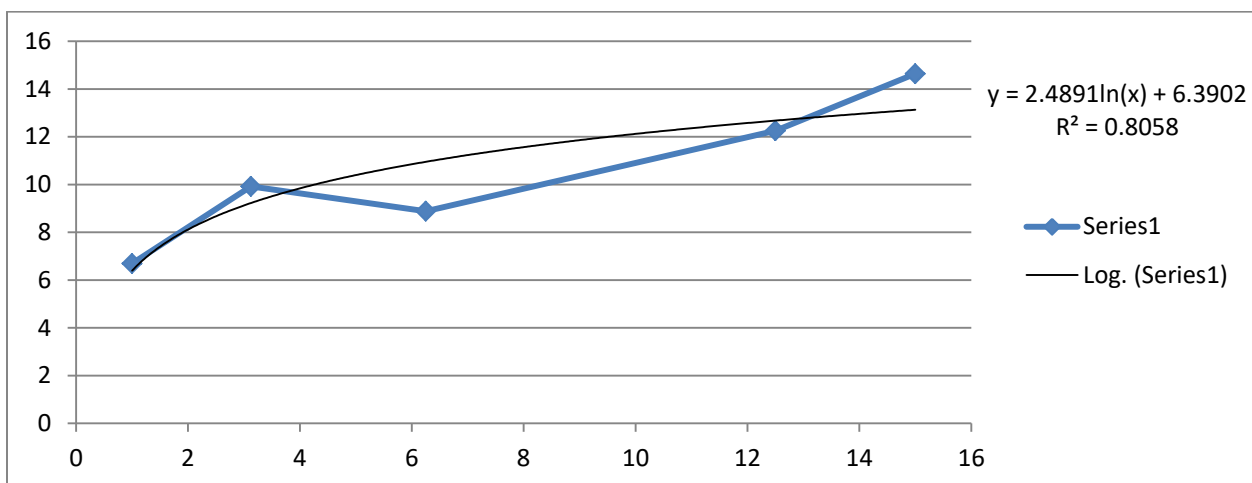

X-axis = concentration (μM) of compound **13**

Y-axis = % Cell Proliferation Inhibition

$IC_{50} > 25 \mu M$

30. The curves that we used to calculate the  $IC_{50}$  value for compound **13** against LNCaP

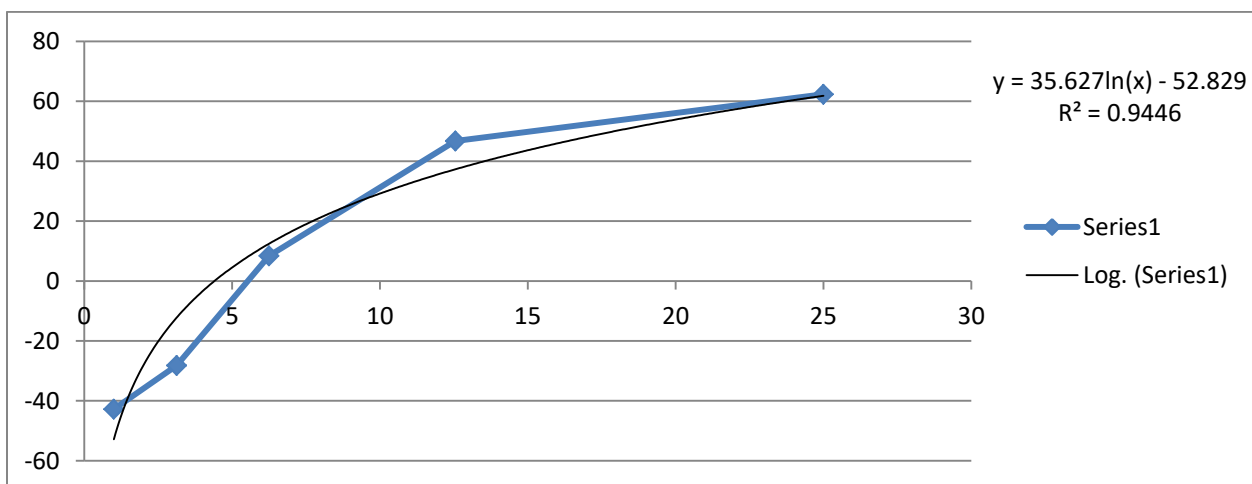

X-axis = concentration (μM) of compound **13**

Y-axis = % Cell Proliferation Inhibition

$IC_{50} = 17.926 \mu M$



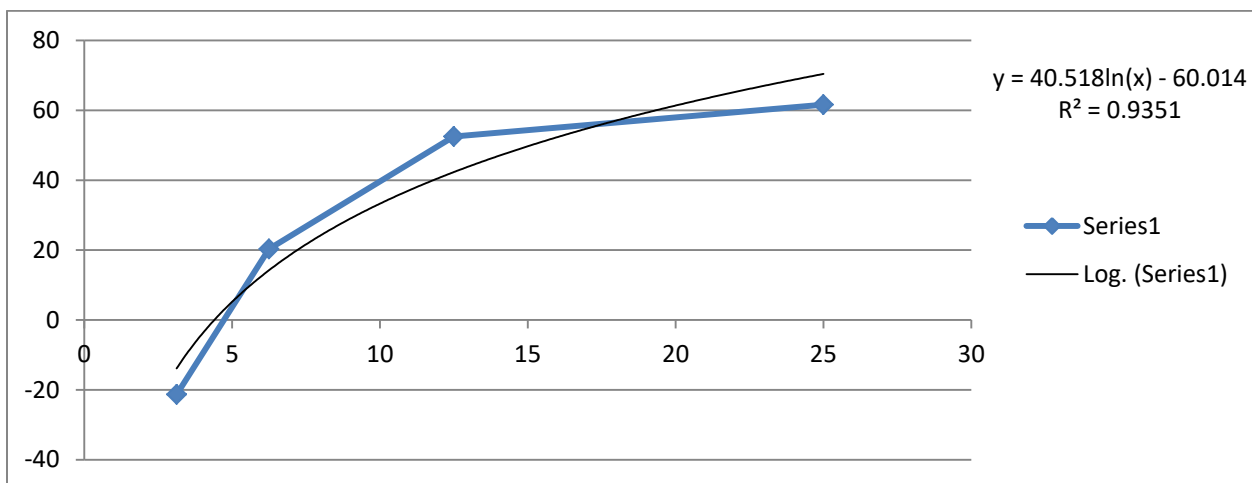

X-axis = concentration ( $\mu\text{M}$ ) of compound **13**  
Y-axis = % Cell Proliferation Inhibition  
IC<sub>50</sub> = 15.123  $\mu\text{M}$

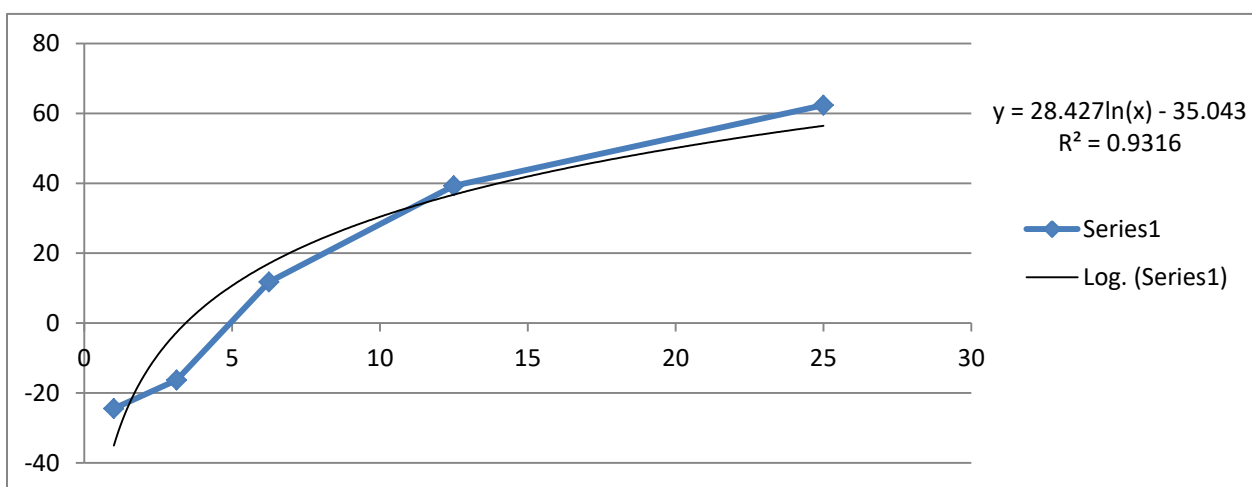

X-axis = concentration ( $\mu\text{M}$ ) of compound **13**  
Y-axis = % Cell Proliferation Inhibition  
IC<sub>50</sub> = 19.918  $\mu\text{M}$
